# Supplementary material for: Diverse BRAF Gene Fusions Confer Resistance to EGFR-Targeted Therapy via Differential Modulation of BRAF Activity
Source: Oxford University Press journal article supplement (doi:10.1158/1541-7786.mcr-19-0529), 2020-01-07
Supplement: 15417786mcr190529-sup-222529_2_supp_5922406_q1j8xn.xlsx [file 15417786mcr190529-sup-222529_2_supp_5922406_q1j8xn.xlsx]

## Sheet: KSEA Kinase Scores AGAP3 all
Kinase.Gene,mS,Enrichment,m,z.score,p.value,FDR
ADRBK1,-1.29184149561484,-0.768205974813292,3,0.487062063404458,0.31310717480155,0.471423520700599
AKT1,-1.2901368632032,-0.767192298748596,43,1.85205129178441,0.0320092289516943,0.254473370165969
AKT2,-1.71598224717798,-1.02042535359825,17,-0.102168139306052,0.459311608269873,0.48675230922601
AKT3,-1.48156461508904,-0.881026653228587,7,0.381874042240687,0.351277397542243,0.471751988812816
ALK,-0.162504446399916,-0.0966348325873574,1,1.0959349584858,0.13655361954883,0.35593484439777
ARAF,-1.11974253699029,-0.665865673218008,11,1.34443211098045,0.0894043479608208,0.35593484439777
ATM,-0.918719053783453,-0.54632512478271,6,1.34816110478062,0.0888032857887185,0.35593484439777
ATR,-0.816827284837054,-0.485734204027634,6,1.52821586894563,0.0632294750306421,0.355880184368042
AURKA,-1.91861341721175,-1.14092192847353,52,-1.23282572829009,0.108820395086739,0.35593484439777
AURKB,-1.32553842705701,-0.78824417931022,25,1.28447838663883,0.0994873106299869,0.35593484439777
AURKC,-1.3350766586802,-0.793916180516993,3,0.433037953721255,0.332493598599515,0.471423520700599
BRAF,-2.12256822656288,-1.26220561820426,4,-0.636199653622844,0.26232314945177,0.471423520700599
CAMK1,-2.16773739914226,-1.28906590127354,3,-0.607405795817009,0.271790821542917,0.471423520700599
CAMK1D,-0.0181825781185788,-0.0108124450217894,1,1.20005205104895,0.11505956294952,0.35593484439777
CAMK1G,-1.98901369951115,-1.1827861336988,1,-0.221750540172719,0.412254042021125,0.473060218814549
CAMK2A,-0.475768092480841,-0.282920073793847,4,1.73987881646707,0.0409401495385868,0.271228490693137
CAMK2B,-1.15365616405496,-0.686032737851793,6,0.932999542458557,0.175410102293867,0.398431518067497
CAMK2D,-0.835717978605758,-0.496967736833901,4,1.22052667589326,0.11113264170539,0.35593484439777
CAMK2G,-0.0220313488680115,-0.0131011535788664,2,1.69320319330369,0.0452083984918527,0.287525414408183
CAMK4,-1.29241662622131,-0.768547981762041,2,0.397097734786352,0.345647695143914,0.471423520700599
CAMKK1,0.0788233082357919,0.0468730386404452,2,1.79609975068624,0.0362393270496306,0.254891230538271
CDC42BPA,-0.409779606687681,-0.243679385809087,1,0.917545009278242,0.179428559352804,0.40181888643797
CDC7,-3.46014023605434,-2.05760568309018,3,-2.2223161527104,0.0131309736465653,0.140879942631014
CDK1,-1.58333089422901,-0.941542950262867,191,0.980110442868111,0.163515802454819,0.388044964034572
CDK16,-3.34757680653677,-1.99066875669913,1,-1.20184899961979,0.114711018519605,0.35593484439777
CDK19,-2.10589486562095,-1.25229064369749,1,-0.306071283353645,0.379775185962519,0.471751988812816
CDK2,-1.6796575828,-0.998824542428319,153,0.0176390062019107,0.492963419530891,0.493264019811588
CDK3,-1.70220335099736,-1.01223160041086,4,-0.0296780061309813,0.488161926379577,0.493264019811588
CDK4,-1.65297779349239,-0.9829591490171,21,0.0947375972221013,0.462261627000802,0.48675230922601
CDK5,-1.4176082786609,-0.84299440241605,46,1.29186012021655,0.0982027953100412,0.35593484439777
CDK6,-2.05498346337153,-1.2220156885061,9,-0.80802790436235,0.209537259330793,0.421726889032861
CDK7,-2.50787652380832,-1.49133290440295,9,-1.78821010244994,0.036871058505536,0.254891230538271
CDK9,-1.95717058526448,-1.16385031943366,5,-0.444481545628642,0.328347234140357,0.471423520700599
CHEK1,-0.623350070743225,-0.370681117126775,17,3.14786909240274,0.000822326643293522,0.0217916560472783
CHEK2,-0.827978389257248,-0.492365315561392,2,0.87093897397908,0.191893737499047,0.414268077974126
CHUK,-1.89524188563211,-1.12702382235063,7,-0.407714011736563,0.341741824664734,0.471423520700599
CLK1,-2.51534105345064,-1.49577175877469,10,-1.9019680780222,0.0285876639996874,0.245735160526772
CSNK1A1,-2.14776778331387,-1.27719077708364,12,-1.16490588343935,0.122028545861149,0.35593484439777
CSNK1D,0.0304142026767488,0.0180860982518143,3,2.13927479510528,0.0162067098760639,0.151580404134951
CSNK1E,-0.242850472952911,-0.144413370325954,2,1.4679133720396,0.0710638777083637,0.35593484439777
CSNK1G1,-1.64506610475258,-0.978254387185703,3,0.0456934256126509,0.481777301969509,0.491942270768735
CSNK2A1,-1.94093610946346,-1.15419633219867,43,-1.22667555541288,0.109972279412009,0.35593484439777
CSNK2A2,-2.10603267755002,-1.25237259488707,5,-0.684618506924138,0.246792342761718,0.471423520700599
DMPK,-1.28075531028561,-0.761613468041589,9,0.867609722279929,0.192804011132612,0.414268077974126
DYRK1A,-2.39358355056686,-1.4233674881957,3,-0.889609825848019,0.186837714167183,0.412599952119196
DYRK1B,-2.8217759413321,-1.67799621321501,1,-0.822524244444232,0.205389297031873,0.418678182411125
DYRK2,-2.27425309806611,-1.35240648647883,5,-0.955983365434235,0.169540319343226,0.390679866312651
EGFR,-0.162504446399916,-0.0966348325873574,1,1.0959349584858,0.13655361954883,0.35593484439777
EIF2AK2,-1.55136865417751,-0.922536296691728,4,0.187953185559409,0.425456674782896,0.473060218814549
ERBB2,-0.162504446399916,-0.0966348325873574,1,1.0959349584858,0.13655361954883,0.35593484439777
FER,-0.162504446399916,-0.0966348325873574,1,1.0959349584858,0.13655361954883,0.35593484439777
GSK3A,-0.369232498864361,-0.219567658018172,9,2.84038985727289,0.00225292149549561,0.0447768147229753
GSK3B,-1.09788443241764,-0.652867541026244,47,2.88712504008102,0.00194389845615232,0.0441542649326026
HIPK2,-1.60226843074047,-0.952804338556813,24,0.280497592209068,0.389547886246358,0.473060218814549
ICK,-3.54699481165432,-2.10925459214153,1,-1.3457137038731,0.0891974325658757,0.35593484439777
JAK2,-0.162504446399916,-0.0966348325873574,1,1.0959349584858,0.13655361954883,0.35593484439777
LATS1,-1.4298748289562,-0.850288824571697,3,0.314583751501276,0.376538858835869,0.471751988812816
LATS2,-1.60248458085565,-0.952932874302494,1,0.057100395618619,0.477232610640578,0.491942270768735
LIMK1,-1.20515388847508,-0.716656355163289,2,0.486127191231006,0.313438494604303,0.471423520700599
LIMK2,-1.20515388847508,-0.716656355163289,2,0.486127191231006,0.313438494604303,0.471423520700599
LMTK2,-2.43430215873742,-1.44758120031819,1,-0.542991806507942,0.293567721900548,0.471423520700599
MAK,-1.41397685254358,-0.840834939935639,3,0.334448925136866,0.369020412902165,0.471751988812816
MAP2K1,0.392839269270011,0.233605651172305,9,4.48971780252787,3.56587961715245e-06,0.00014174371478181
MAP2K2,0.954128900663597,0.567381930925637,8,5.37825350631184,3.76059323827575e-08,5.97934324885845e-06
MAP2K4,-1.5211736610813,-0.904580553526101,3,0.200502115837771,0.420543951697908,0.473060218814549
MAP2K5,-1.90220769948568,-1.1311661105802,1,-0.159126708820497,0.436784522862308,0.476557121740294
MAP2K6,-0.84929144899965,-0.5050393316007,3,1.04004649930225,0.149159148943526,0.364866225877241
MAP2K7,-0.584746301295063,-0.347725014198467,2,1.11909553129621,0.131549693034714,0.35593484439777
MAP3K10,-0.226002024649127,-0.134394278434855,1,1.0501263550438,0.146830011534791,0.364780809906747
MAP3K7,-4.197441351564,-2.49604888536667,1,-1.81496069609702,0.0347649748990922,0.254891230538271
MAP3K8,-1.81784929315893,-1.08100157260405,2,-0.138972825728954,0.444735811285021,0.477790499961611
MAP4K4,-1.40933172757026,-0.838072671677208,1,0.196445276223601,0.422130830634804,0.473060218814549
MAP4K5,-0.521495530980202,-0.310112335063792,1,0.836950589535369,0.201310171112816,0.415692431258931
MAPK1,-0.783523487752036,-0.465929780658725,52,4.67220051733206,1.4899491422997e-06,7.89673045418838e-05
MAPK10,0.0263627803660256,0.0156768809940051,1,1.23218809022188,0.108939415577085,0.35593484439777
MAPK11,-1.08585076997952,-0.645711607875597,11,1.42552456524605,0.0770028121701386,0.35593484439777
MAPK12,-1.45635447827178,-0.866035202811006,10,0.513939657357491,0.303647089952743,0.471423520700599
MAPK13,-0.668652521395725,-0.397620655284566,9,2.19236452530339,0.0141765980006052,0.140879942631014
MAPK14,-1.34066019104185,-0.797236481757776,3,0.426061101008345,0.335031661947956,0.471423520700599
MAPK15,0.0263627803660256,0.0156768809940051,1,1.23218809022188,0.108939415577085,0.35593484439777
MAPK3,-0.680030494746026,-0.404386676610431,45,4.84721295922263,6.26040008190808e-07,4.97701806511693e-05
MAPK6,-3.78272973027738,-2.24943662962297,1,-1.51577825912676,0.0647877156127277,0.355880184368042
MAPK7,-1.89927677530054,-1.12942320831363,10,-0.496516403790579,0.309765058417496,0.471423520700599
MAPK8,-1.83658737051821,-1.09214435059405,10,-0.353500598406658,0.361856590112208,0.471751988812816
MAPK9,-1.65468218554163,-0.98397268214798,5,0.0434777731027334,0.482660341131589,0.491942270768735
MAPKAPK2,-0.631750510347285,-0.375676519362113,4,1.51482025766897,0.0649089644444857,0.355880184368042
MAPKAPK3,-0.767257983090958,-0.45625734181355,1,0.659651942561923,0.254738606530913,0.471423520700599
MAPKAPK5,-0.767257983090958,-0.45625734181355,1,0.659651942561923,0.254738606530913,0.471423520700599
MARK1,-1.90657464703659,-1.13376295795791,8,-0.458989020772295,0.323121025198132,0.471423520700599
MARK2,-3.4526746340343,-2.05316619101871,3,-2.21298757676004,0.0134492510776902,0.140879942631014
MKNK1,-1.90449240527898,-1.13252473286246,1,-0.160774947769957,0.436135328652702,0.476557121740294
MTOR,-2.62259326925076,-1.55955032082684,16,-2.71531725927603,0.00331061533218713,0.058487537535306
NEK2,-1.49791556879711,-0.8907499051717,4,0.265077739233953,0.395474787812754,0.473060218814549
NLK,-2.41894256790812,-1.43844747184933,4,-1.06382209364047,0.143704650335326,0.362683165132013
NUAK1,-1.86918020012952,-1.11152599031415,2,-0.191342976659728,0.424128446275505,0.473060218814549
NUAK2,-1.0875302100092,-0.646710303047973,1,0.428600241994633,0.334107084699589,0.471423520700599
OXSR1,0.142371912493567,0.0846628275948816,1,1.31587972816789,0.0941072068856284,0.35593484439777
PAK1,-1.6594252218073,-0.98679317429846,21,0.0734225617693899,0.470734932175865,0.491942270768735
PAK2,-1.80214751602693,-1.07166435975794,21,-0.398413744521344,0.345162614040202,0.471423520700599
PAK3,-1.79762067373964,-1.06897242943682,2,-0.11833465830448,0.452901248478794,0.483297305423679
PAK4,-1.57462092728025,-0.936363484613888,11,0.256049641890913,0.398956252958559,0.473060218814549
PAK5,-2.14394181376503,-1.27491562747988,1,-0.333519220861917,0.369371191519959,0.471751988812816
PAK6,-2.14394181376503,-1.27491562747988,1,-0.333519220861917,0.369371191519959,0.471751988812816
PBK,0.0263627803660256,0.0156768809940051,1,1.23218809022188,0.108939415577085,0.35593484439777
PDK1,-1.31936127478731,-0.784570876279603,8,0.739215131392174,0.229888187029081,0.456902771720298
PIM1,-1.87416258011293,-1.11448881050923,4,-0.277788638124904,0.390587306759618,0.473060218814549
PIM2,-1.30935561598656,-0.778620915004349,3,0.465177451600489,0.320902192365209,0.471423520700599
PIM3,-1.30935561598656,-0.778620915004349,3,0.465177451600489,0.320902192365209,0.471423520700599
PKD1,-1.9481165328905,-1.15846624007596,7,-0.508636138250017,0.305503646636455,0.471423520700599
PKD2,-0.882195255513128,-0.524605896727735,1,0.57673356869216,0.282059726015484,0.471423520700599
PKD3,-1.25268618289352,-0.744921891370928,1,0.309452950451592,0.378488498461364,0.471751988812816
PKM,-0.162504446399916,-0.0966348325873574,1,1.0959349584858,0.13655361954883,0.35593484439777
PLK1,-1.51530569173366,-0.901091109094894,28,0.63494453183781,0.262732295988287,0.471423520700599
PLK2,-2.28578632244266,-1.3592648293212,1,-0.435849089615926,0.331473112330976,0.471423520700599
PLK3,0.0263627803660256,0.0156768809940051,1,1.23218809022188,0.108939415577085,0.35593484439777
PNCK,-1.98901369951115,-1.1827861336988,1,-0.221750540172719,0.412254042021125,0.473060218814549
PRKAA1,-1.78473324633977,-1.06130879673717,14,-0.278296824062018,0.390392256947001,0.473060218814549
PRKAA2,-2.15221122565173,-1.2798331128224,12,-1.17601041036659,0.119795358025706,0.35593484439777
PRKACA,-1.62937835503183,-0.968925515874657,27,0.195887737120842,0.422349017842576,0.473060218814549
PRKACB,-1.93574879468299,-1.15111164555474,5,-0.40992497305355,0.340930492703697,0.471423520700599
PRKACG,-1.93574879468299,-1.15111164555474,5,-0.40992497305355,0.340930492703697,0.471423520700599
PRKCA,-1.23734443383831,-0.735798772684694,9,0.961562516027709,0.168134704064771,0.390679866312651
PRKCB,0.132697471344434,0.0789098280829665,3,2.2670819347917,0.0116926104652524,0.140879942631014
PRKCD,-0.755281482507244,-0.44913540050961,8,1.89021540012434,0.0293645789308721,0.245735160526772
PRKCE,-1.3165088690207,-0.782874665746085,20,1.1780044677104,0.119397412556781,0.35593484439777
PRKCG,-1.8611937404858,-1.10677676524533,12,-0.4487338408499,0.326811834748939,0.471423520700599
PRKCH,-2.08411154447917,-1.23933698219243,5,-0.649256419753615,0.258086324696781,0.471423520700599
PRKCI,-2.22252419156411,-1.32164539451802,12,-1.35172828041879,0.088231127323473,0.35593484439777
PRKCQ,-1.51800216543118,-0.902694593123232,4,0.236095879922771,0.40667913545948,0.473060218814549
PRKCT,-2.13449013361845,-1.26929509494142,4,-0.653401125793566,0.256748856613638,0.471423520700599
PRKCZ,-1.8073394919802,-1.07475181821312,3,-0.157073827907294,0.437593331912471,0.476557121740294
PRKD1,-1.4549017479171,-0.865171322728157,12,0.566623179395767,0.285485111639346,0.471423520700599
PRKD2,-1.98596615735125,-1.1809738834315,2,-0.310493378771297,0.37809289691927,0.471751988812816
PRKDC,-1.44460584074903,-0.859048762468649,25,0.8549886259998,0.196278722241513,0.415692431258931
PRKG1,-0.895241007225971,-0.532363678503406,6,1.38964958004879,0.0823176561778968,0.35593484439777
PRKG2,-1.01789926132885,-0.605303589461406,2,0.677172969786074,0.249148107809137,0.471423520700599
RAF1,-0.922281709018398,-0.548443691996238,41,3.50772292863174,0.000225979750757928,0.0071861560741021
RET,-0.162504446399916,-0.0966348325873574,1,1.0959349584858,0.13655361954883,0.35593484439777
ROCK1,-1.40675341284793,-0.836539452020334,4,0.396610662722912,0.345827294203065,0.471423520700599
ROCK2,-1.14241856897213,-0.679350193813326,7,1.02920394319461,0.151691924879512,0.365439637209733
RPS6KA1,-0.372598012614341,-0.22156899315087,7,2.49856462189052,0.00623487025215634,0.0901222154629871
RPS6KA2,-1.67335911083303,-0.995079095472447,8,0.016885400748435,0.493264019811588,0.493264019811588
RPS6KA3,-0.51620292535669,-0.306965036206995,8,2.37805326862178,0.00870215573870718,0.11530356353787
RPS6KB1,-0.708040575120712,-0.421043140404075,13,2.53244090473102,0.00566357306335084,0.0900508117072783
RPS6KB2,-1.0180989109729,-0.605422313043173,5,1.07038241228544,0.142223606279649,0.362683165132013
SGK1,-1.93652620514415,-1.15157394016532,2,-0.260052466815862,0.397411651357956,0.473060218814549
SGK3,-0.521495530980202,-0.310112335063792,1,0.836950589535369,0.201310171112816,0.415692431258931
SRC,-0.965628904629845,-0.574220518931392,1,0.516542628321071,0.302737737012655,0.471423520700599
STK3,-1.81936664537003,-1.08190388069557,2,-0.140520898206148,0.444124220963474,0.477790499961611
STK38,-1.4298748289562,-0.850288824571697,3,0.314583751501276,0.376538858835869,0.471751988812816
STK38L,-1.60248458085565,-0.952932874302494,1,0.057100395618619,0.477232610640578,0.491942270768735
TESK1,-1.0832569581438,-0.644169172711143,1,0.431683063505426,0.332985889256557,0.471423520700599
TGFBR2,-1.4088297039468,-0.837774138499299,1,0.196807447533433,0.421989111407187,0.473060218814549
TRPM7,-3.36283765735105,-1.99974376846804,1,-1.21285852600511,0.11259195732664,0.35593484439777
TTK,-2.47580539447909,-1.47226149877513,8,-1.62049977198822,0.052562481632814,0.321439791523747
UHMK1,-1.44161751159807,-0.857271723786842,4,0.3463071482254,0.364555948550605,0.471751988812816
VRK1,0.0263627803660256,0.0156768809940051,1,1.23218809022188,0.108939415577085,0.35593484439777
WNK1,-1.13588945424936,-0.675467592923586,1,0.393712778515982,0.346896552968365,0.471423520700599
WNK2,-1.13588945424936,-0.675467592923586,1,0.393712778515982,0.346896552968365,0.471423520700599

## Sheet: KSEA Kinase Scores DLG1 all
Kinase.Gene,mS,Enrichment,m,z.score,p.value,FDR
ADRBK1,-2.73013654487823,-1.73104379612184,8,-2.50623993851933,0.00610113921157429,0.0848101913911974
AKT1,-1.55304467818534,-0.984708387687141,54,0.136202291975879,0.445830681659867,0.472576791379604
AKT2,-1.48161312629544,-0.939417193377338,22,0.344425253342056,0.365263249959094,0.469693553212021
AKT3,-1.63041514484436,-1.03376515247219,12,-0.141773021512283,0.443629647250922,0.472576791379604
ALK,-0.782484925276513,-0.496134773185562,1,0.610729143329258,0.270689454529359,0.418988133156725
ARAF,-1.63969048608538,-1.03964618503164,13,-0.173263601194745,0.431222116488383,0.472576791379604
ATM,-0.946378341632862,-0.600051437039284,8,1.37114502190303,0.085164876290736,0.284450686811058
ATR,-1.28182445413776,-0.812741133118459,5,0.507529920458351,0.305891524043174,0.436707945681728
AURKA,-1.92731651916172,-1.22201554714065,62,-2.11891477748332,0.0170488349266619,0.142357771637627
AURKB,-1.73491352880506,-1.10002238037505,25,-0.60617978210574,0.272197688393322,0.418988133156725
AURKC,-2.24831937271152,-1.42554749107116,3,-0.89339376826188,0.185823169355983,0.418988133156725
BCKDK,-1.76507973699603,-1.11914927263231,1,-0.144419438632608,0.442584633953082,0.472576791379604
BRAF,-2.84209102094477,-1.80202856119033,4,-1.94425886143462,0.0259321214330681,0.15394622385605
BUB1,-1.06301917965978,-0.674007591144374,1,0.395131582806286,0.346372890823607,0.455466714705058
CAMK1,-0.76773425164348,-0.486782104679299,3,1.07744888422647,0.140639887541901,0.366982206554649
CAMK1G,-2.24142737664973,-1.421177619151,1,-0.510504461996299,0.304849044694154,0.436707945681728
CAMK2A,-1.81238330641775,-1.14914211329645,5,-0.404221632646227,0.343024873691847,0.454644078623321
CAMK2B,-1.93582474914302,-1.22741019260362,6,-0.675180371600242,0.249780587821542,0.418988133156725
CAMK2D,-0.645870522073776,-0.409514374814412,5,1.60040016995202,0.0547549187225518,0.242335071613242
CAMK2G,-1.99279558763214,-1.26353256776886,2,-0.451734800258667,0.325730022399118,0.446774498786239
CAMK4,-1.59175327016636,-1.00925158063881,2,-0.0158586127222622,0.493673594054896,0.493673594054896
CDC42BPA,-0.241771592486739,-0.153295341962955,1,1.02628080474046,0.152379621253969,0.374226422785484
CDC7,-2.3948656759527,-1.51846521328038,3,-1.08846509572724,0.138194918697885,0.366982206554649
CDK1,-1.46533103124331,-0.929093526716517,212,1.25137672395528,0.105398532617976,0.324687803881327
CDK16,-2.91770501937741,-1.84997163683332,1,-1.03024067149717,0.151448520876912,0.374226422785484
CDK19,-3.18165731788695,-2.01733066129831,1,-1.23309458599753,0.108770238574316,0.324687803881327
CDK2,-1.38416345508627,-0.877629203653085,172,1.94525377508014,0.0258722212861517,0.15394622385605
CDK3,-1.10667115371223,-0.701685136801831,4,0.723167907399566,0.234788366490613,0.418988133156725
CDK4,-1.84316849280431,-1.16866146884183,23,-0.980424269506675,0.163438367356166,0.394882392899915
CDK5,-1.30843832702032,-0.829615666236793,46,1.40069259709512,0.080653008694066,0.284450686811058
CDK6,-1.41372028712214,-0.896369720798536,12,0.435122507284837,0.331736753589782,0.446774498786239
CDK7,-2.71724606345235,-1.722870582975,8,-2.47821968402387,0.00660199094662015,0.0848101913911974
CDK8,-0.637300932132769,-0.404080824052815,1,0.722306657517635,0.23505298032846,0.418988133156725
CDK9,-2.00937720317158,-1.27404614547364,4,-0.664336250056157,0.253237562400672,0.418988133156725
CHEK1,-0.976505984970038,-0.619153877240829,18,1.95848409155403,0.0250866179758708,0.15394622385605
CHEK2,-1.29015286199514,-0.818021762316341,3,0.382044840862839,0.351214052276478,0.458224583829468
CHUK,-1.47822595672374,-0.937269557617323,10,0.240443259826168,0.404993322573101,0.472576791379604
CLK1,-2.72322815899915,-1.72666353223371,10,-2.78527206011415,0.00267414140544826,0.0405983286099873
CSNK1A1,-1.7005725840497,-1.0782484952984,9,-0.284532255594578,0.388001259330751,0.472576791379604
CSNK1D,0.579464494245897,0.367409615361192,2,2.3439475230581,0.00954042792409365,0.113803675951688
CSNK1E,0.229833339667232,0.145725889615046,1,1.38872093928491,0.0824588121734421,0.284450686811058
CSNK1G1,-2.00634704934306,-1.27212487563972,1,-0.329839376352187,0.37076066639022,0.472576791379604
CSNK2A1,-2.56705545131131,-1.62764218574694,43,-4.98862215361636,3.04057272394233e-07,2.53887822449184e-05
CSNK2A2,-2.16050201795717,-1.36986687413478,4,-0.896622617180116,0.184960162592277,0.418988133156725
DMPK,-1.65507291506978,-1.04939941818501,10,-0.189345980847082,0.424910829778167,0.472576791379604
DYRK1A,-2.03882349133369,-1.29271657224679,3,-0.614528735333398,0.269432995241805,0.418988133156725
DYRK1B,-2.98649373000087,-1.89358713694131,1,-1.08310650862833,0.139380575181918,0.366982206554649
DYRK2,-1.37730406498631,-0.873280005551626,5,0.343450698884935,0.365629712081214,0.469693553212021
EGFR,-0.782484925276513,-0.496134773185562,1,0.610729143329258,0.270689454529359,0.418988133156725
EIF2AK2,-1.00874513922463,-0.639595121496295,7,1.15577670823626,0.123886251241335,0.348059302340276
ERBB2,-0.782484925276513,-0.496134773185562,1,0.610729143329258,0.270689454529359,0.418988133156725
FER,-0.782484925276513,-0.496134773185562,1,0.610729143329258,0.270689454529359,0.418988133156725
GRK1,-4.47874318656921,-2.83974829833261,1,-2.22993737687702,0.0128758002907269,0.126485802855964
GRK7,-4.47874318656921,-2.83974829833261,1,-2.22993737687702,0.0128758002907269,0.126485802855964
GSK3A,-0.790876727139202,-0.501455597369226,11,2.00416947981316,0.022525954357116,0.15394622385605
GSK3B,-1.25375508540819,-0.794943742474557,51,1.7749755370774,0.0379509632539018,0.1980565894813
HIPK2,-1.33938521626492,-0.849237549521949,23,0.876377790339266,0.190412344075827,0.418988133156725
ICK,-1.35593631066524,-0.859731775290421,2,0.24044101648717,0.404994192036219,0.472576791379604
IKBKE,-1.72937529335537,-1.09651086072794,1,-0.116979684561658,0.453438076154682,0.472576791379604
IRAK1,0.460048801646791,0.291694063982975,1,1.56564725477738,0.0587156103620695,0.24513767326164
JAK2,-0.782484925276513,-0.496134773185562,1,0.610729143329258,0.270689454529359,0.418988133156725
LATS1,-2.3254139500786,-1.47442932817791,4,-1.15010047031912,0.1250512463498,0.348059302340276
LATS2,-1.7866665209188,-1.13283637867022,1,-0.161009419644084,0.436042990818878,0.472576791379604
LIMK1,-1.02295191486355,-0.648602931335983,2,0.60234788424194,0.273471296491515,0.418988133156725
LIMK2,-1.02295191486355,-0.648602931335983,2,0.60234788424194,0.273471296491515,0.418988133156725
LMTK2,-1.42602572796097,-0.904171988806909,1,0.116152010633701,0.453766034600321,0.472576791379604
MAK,-1.52018945553963,-0.96387652510585,2,0.0619211160658907,0.475312825787313,0.47817615606314
MAP2K1,-0.748451935784179,-0.474556147224635,12,2.20623208215569,0.0136838770216556,0.12695597014536
MAP2K2,-0.111961613289775,-0.0709892904267551,10,3.56086064339467,0.000184820617525464,0.00514417385445876
MAP2K4,-1.50122437588123,-0.951851711348012,3,0.101082445406704,0.459742506599566,0.472576791379604
MAP2K5,-0.491245225527443,-0.311474164769911,2,1.18023773412094,0.118952837537309,0.342502135667768
MAP2K6,-0.498843950026028,-0.316292138041758,4,1.65742859240816,0.0487164273438734,0.234021260661847
MAP2K7,-0.923421242833593,-0.585495482492621,3,0.870210166027203,0.192092780657383,0.418988133156725
MAP3K10,-0.683074323978377,-0.43310345522137,1,0.687128666008289,0.246000825688569,0.418988133156725
MAP3K7,-3.24022497589808,-2.05446550030251,1,-1.27810528966544,0.100606152043901,0.323100526756374
MAP3K8,-1.46817328635132,-0.930895659317151,2,0.118455323376778,0.452853446287121,0.472576791379604
MAP4K4,-0.973215410678493,-0.617067487743665,1,0.464148015614818,0.321270851347199,0.446774498786239
MAP4K5,-1.2773248785939,-0.809888176058489,1,0.230432316408533,0.408877925931059,0.472576791379604
MAPK1,-0.730554269368391,-0.463208127114714,64,5.20511316481972,9.69392102525787e-08,1.61888481121806e-05
MAPK10,-0.0544334426731316,-0.0345135386790998,3,2.02694083735316,0.0213342317497315,0.15394622385605
MAPK11,-0.865017484203811,-0.548464563934373,15,2.1196869477445,0.0170162272235681,0.142357771637627
MAPK12,-1.22647674822547,-0.777647905591509,13,0.971733461357438,0.165591582788452,0.394882392899915
MAPK13,-0.885547687631424,-0.56148174483075,13,1.91643286786943,0.0276550102735419,0.15394622385605
MAPK14,-0.842677679147402,-0.534300004648129,5,1.26219220234793,0.103439816943291,0.324687803881327
MAPK15,-0.511843673366364,-0.324534616053272,1,0.818723685090254,0.206472040078122,0.418988133156725
MAPK3,-0.783215786015973,-0.496598175630119,55,4.52512298372001,3.0180197425156e-06,0.000168003099000035
MAPK6,-1.28903531540946,-0.817313181609029,2,0.313152921152871,0.377082242123633,0.472576791379604
MAPK7,-0.956953206390367,-0.606756432827003,13,1.71857132131861,0.042846228707047,0.216827884668995
MAPK8,-1.32298093327595,-0.838836409567553,15,0.756566000816924,0.224654958454741,0.418988133156725
MAPK9,-0.922434503052234,-0.584869839874081,6,1.23252055049633,0.108877347409307,0.324687803881327
MAPKAPK2,-0.538212652809964,-0.341253874422066,4,1.59691693546394,0.0551421121036119,0.242335071613242
MAPKAPK3,-0.755423018491748,-0.478976164053401,1,0.63152689260491,0.263848035552802,0.418988133156725
MAPKAPK5,-0.755423018491748,-0.478976164053401,1,0.63152689260491,0.263848035552802,0.418988133156725
MARK1,-1.9051738627342,-1.20797598999453,9,-0.756255788906782,0.224747924878136,0.418988133156725
MARK2,-1.33591102121757,-0.847034735236155,3,0.321135048773434,0.374054025356741,0.472576791379604
MOK,-0.608080160710344,-0.385553386227928,1,0.744763548028649,0.228207337401148,0.418988133156725
MTOR,-2.54831566017889,-1.6157602162384,19,-3.25328929105864,0.0005703864717928,0.0119068175986747
NEK2,-1.47686599615328,-0.936407274259048,7,0.203934507018317,0.41920233949306,0.472576791379604
NEK6,0.460048801646791,0.291694063982975,1,1.56564725477738,0.0587156103620695,0.24513767326164
NLK,-1.5050799052604,-0.954296310767441,5,0.1238712491811,0.450708608710289,0.472576791379604
NUAK1,-2.84825807087556,-1.80593878082498,2,-1.38150133495455,0.0835624338226465,0.284450686811058
NUAK2,-0.725366744781349,-0.459918975782531,1,0.654625887430403,0.256354326244176,0.418988133156725
OXSR1,-1.34228250563,-0.851074576607793,1,0.180510762418152,0.428375802994277,0.472576791379604
PAK1,-1.2076027373021,-0.76568083398913,24,1.39138619750469,0.0820541739040095,0.284450686811058
PAK2,-1.02231087541939,-0.648196480107394,21,1.95408785180754,0.0253454142571273,0.15394622385605
PAK3,-0.326648826149028,-0.207111774345696,4,1.92210107401614,0.0272965204846301,0.15394622385605
PAK4,-1.36999669061419,-0.868646762904279,13,0.574046024091126,0.282968328624342,0.421925990002366
PAK5,-1.17002959690132,-0.741857574411285,2,0.442495278852528,0.329065422958783,0.446774498786239
PAK6,-1.17002959690132,-0.741857574411285,2,0.442495278852528,0.329065422958783,0.446774498786239
PBK,-0.511843673366364,-0.324534616053272,1,0.818723685090254,0.206472040078122,0.418988133156725
PDK1,-1.60080397753406,-1.01499018403166,12,-0.0629407400112819,0.474906846650725,0.47817615606314
PIM1,-2.20971975661918,-1.40107339431044,6,-1.19078604309305,0.11686879468233,0.342405065121915
PIM2,-1.40808426150264,-0.892796197268466,3,0.225063503613311,0.410964936257241,0.472576791379604
PIM3,-1.40808426150264,-0.892796197268466,3,0.225063503613311,0.410964936257241,0.472576791379604
PKD1,-1.70197213383136,-1.07913588020647,7,-0.253779603395343,0.399832915913293,0.472576791379604
PKD2,-1.93578444020876,-1.22738463471322,1,-0.275610254040778,0.391423716512129,0.472576791379604
PKD3,-2.20647606403831,-1.39901673017428,2,-0.68397520819225,0.246995410492009,0.418988133156725
PKM,-0.782484925276513,-0.496134773185562,1,0.610729143329258,0.270689454529359,0.418988133156725
PLK1,-1.6234740208244,-1.0293641309572,35,-0.210564634837557,0.416613505433067,0.472576791379604
PLK2,-2.94105780766201,-1.86477847840248,1,-1.04818787083879,0.147276028846957,0.374226422785484
PLK3,-0.511843673366364,-0.324534616053272,1,0.818723685090254,0.206472040078122,0.418988133156725
PLK4,-0.0945100966789626,-0.0599241517183131,2,1.61143261778554,0.0535427313469317,0.242335071613242
PNCK,-2.24142737664973,-1.421177619151,1,-0.510504461996299,0.304849044694154,0.436707945681728
PRKAA1,-1.39294970420932,-0.883200127226183,19,0.617096988846308,0.268585377349498,0.418988133156725
PRKAA2,-1.32945617546554,-0.842942038585163,15,0.737292545079459,0.23047223237582,0.418988133156725
PRKACA,-1.72161638398858,-1.09159132219817,30,-0.608063889144968,0.27157255054661,0.418988133156725
PRKACB,-3.750895757861,-2.37825644425218,5,-3.73550473294823,9.36695279321954e-05,0.00312856223293533
PRKACG,-3.8722036626457,-2.45517175326558,6,-4.32040179845661,7.78726773800297e-06,0.000325118428061624
PRKCA,-0.932066415639291,-0.590976956589504,9,1.48731612905695,0.0684656682885678,0.26590154893467
PRKCB,-0.684689450275983,-0.434127526476219,4,1.3717748024555,0.0850667768402195,0.284450686811058
PRKCD,-0.602819733679097,-0.382218011081775,9,2.24641895160125,0.0123385927769994,0.126485802855964
PRKCE,-1.26626883813445,-0.802878090690083,21,1.09491095605071,0.136777824351438,0.366982206554649
PRKCG,-1.8480760365023,-1.17177309821749,12,-0.721240372566933,0.235380818077341,0.418988133156725
PRKCH,-2.37924895958181,-1.50856343014783,5,-1.37836547635544,0.0840452384270958,0.284450686811058
PRKCI,-2.87719079031495,-1.82428357921407,12,-3.46099943438423,0.000269086971422143,0.00641964631821398
PRKCQ,-0.604417045082127,-0.383230786798021,4,1.49515748722,0.0674366728257458,0.26590154893467
PRKCT,-2.81984935378462,-1.78792622626308,3,-1.65417114461575,0.0490463719949979,0.234021260661847
PRKCZ,-1.84828761079077,-1.17190724695088,2,-0.29467510039398,0.384121043006971,0.472576791379604
PRKD1,-1.74884537265129,-1.10885586963909,13,-0.475726982805662,0.317134447531964,0.446774498786239
PRKD2,-1.95830082256703,-1.24166115288427,3,-0.507343064047546,0.305957063741091,0.436707945681728
PRKD3,-1.22601847988443,-0.777357340429042,1,0.269862561478955,0.39363299524999,0.472576791379604
PRKDC,-1.73447471577648,-1.09974415085858,23,-0.579809881383123,0.281021416617212,0.421925990002366
PRKG1,-0.494242440850156,-0.313374549935538,5,1.86096907377072,0.0313742720768381,0.169016239897805
PRKG2,-0.616327774453431,-0.39078278789634,2,1.04429072259927,0.148175451928863,0.374226422785484
RAF1,-1.16680464407552,-0.739812792221778,44,2.09192705049028,0.0182225209349745,0.144912428387655
RET,-0.782484925276513,-0.496134773185562,1,0.610729143329258,0.270689454529359,0.418988133156725
ROCK1,-1.1140619435807,-0.706371269066626,5,0.795825420374753,0.213066757160927,0.418988133156725
ROCK2,-1.76748691751143,-1.12067554607279,8,-0.413712386008472,0.339542377516632,0.453628616362221
RPS6KA1,-0.196656959134593,-0.124690396790871,7,2.80701653119892,0.00250013377888054,0.0405983286099873
RPS6KA2,-1.86762958626977,-1.18417103160315,8,-0.631394175521022,0.263891411710877,0.418988133156725
RPS6KA3,-0.751431497976234,-0.476445339418114,10,2.00676393320405,0.0223874024421155,0.15394622385605
RPS6KB1,-0.516770389812264,-0.327658401914798,13,2.93829851281569,0.00165009546847653,0.0306184381372868
RPS6KB2,-0.700207116723832,-0.443966506978946,5,1.50702414889478,0.0659022336957096,0.26590154893467
SGK1,-1.35593631066524,-0.859731775290421,2,0.24044101648717,0.404994192036219,0.472576791379604
SGK3,-1.2773248785939,-0.809888176058489,1,0.230432316408533,0.408877925931059,0.472576791379604
SRC,-1.47525883000038,-0.93538825013605,1,0.0783151456846754,0.468788684975623,0.477364087749567
STK3,-2.81846247328778,-1.78704687431839,2,-1.34911774121313,0.0886495753188129,0.290283903494936
STK38,-1.71833733411079,-1.08951223975858,3,-0.187921862686081,0.425468952055756,0.472576791379604
STK38L,-1.7866665209188,-1.13283637867022,1,-0.161009419644084,0.436042990818878,0.472576791379604
TESK1,-0.811213107669894,-0.514349884806705,1,0.588650819753806,0.278047767695339,0.421925990002366
TGFBR2,-2.26423662772161,-1.43563983080713,1,-0.528033939454456,0.298737889910097,0.436707945681728
TLK1,-2.14551741628169,-1.36036588349153,1,-0.436795269047067,0.331129915154996,0.446774498786239
TTK,-1.95479823665359,-1.23944033736234,11,-0.962560233041404,0.167884131113137,0.394882392899915
UHMK1,-2.10619675192035,-1.33543460588573,4,-0.813152718598009,0.208065251937901,0.418988133156725
VRK1,-0.511843673366364,-0.324534616053272,1,0.818723685090254,0.206472040078122,0.418988133156725
WNK1,-1.4506001206827,-0.919753388991534,1,0.0972659778610308,0.461257586795661,0.472576791379604
WNK2,-1.4506001206827,-0.919753388991534,1,0.0972659778610308,0.461257586795661,0.472576791379604

## Sheet: KSEA Kinase Scores TRIM24 all
Kinase.Gene,mS,Enrichment,m,z.score,p.value,FDR
ADRBK1,-1.75265199215493,-1.172664916109,6,-0.46105503020291,0.322379562088782,0.497140827662176
AKT1,-1.32666688831886,-0.887646676156287,53,0.891655098693294,0.186288913759332,0.453600157254674
AKT2,-1.33616176343062,-0.89399951001962,19,0.503683484373721,0.30724190800265,0.497140827662176
AKT3,-0.775433074541711,-0.518826992110147,8,1.48360841482276,0.0689564178471099,0.310303880311994
ALK,-0.330045593151681,-0.220827003613817,1,0.849389582803978,0.197832273895872,0.453600157254674
ARAF,-1.25545073635105,-0.839997352019642,11,0.57849092467646,0.281466361383289,0.497140827662176
ATM,-1.7174456291048,-1.14910903224987,10,-0.514016415830745,0.303620256790046,0.497140827662176
ATR,-1.95700356436666,-1.30939252681383,5,-0.754167579822122,0.225374301063032,0.453600157254674
AURKA,-1.62268069564129,-1.08570368238721,66,-0.759004739286647,0.223924860878177,0.453600157254674
AURKB,-0.986325756296578,-0.659931130333277,22,1.73880650305843,0.0410344021730217,0.233896092386224
AURKC,-1.30605620384239,-0.873856473257633,4,0.275022358449437,0.391649530429495,0.497140827662176
BRAF,-1.31826734989872,-0.882026710492313,4,0.257209332514603,0.398508590005471,0.497140827662176
BUB1,-0.804447452740511,-0.538239940903602,1,0.503372403523384,0.307351235081883,0.497140827662176
CAMK1,-1.81538433155457,-1.21463788840965,2,-0.330898213493763,0.370360685727186,0.497140827662176
CAMK1G,-1.52530566490175,-1.02055196786293,1,-0.0224040456867156,0.491062826585796,0.497140827662176
CAMK2A,-1.38445125714308,-0.92630905883293,5,0.179627217654885,0.42872261781202,0.497140827662176
CAMK2B,-1.54095589199182,-1.03102322645836,7,-0.0894765067599388,0.464351611786195,0.497140827662176
CAMK2D,-1.61648971450953,-1.08156141889052,6,-0.217787743436087,0.413797247339367,0.497140827662176
CAMK2G,-1.11497570563874,-0.746008276696634,3,0.479571349410196,0.315766111418913,0.497140827662176
CAMK4,-1.7886645843996,-1.19676023203737,2,-0.303336981882358,0.380816532767019,0.497140827662176
CDC7,-3.85098106082429,-2.5766155533686,3,-2.97686727187958,0.00145605026024029,0.03556922778587
CDK1,-1.31306692079373,-0.878547205840261,217,1.95034039151884,0.0255677807204249,0.174883620127706
CDK14,-1.76622005276919,-1.18174303813961,1,-0.198121141336914,0.421475142141377,0.497140827662176
CDK16,-1.6759545768457,-1.12134818666587,1,-0.132283698388154,0.447379950430019,0.497140827662176
CDK19,-3.03515283534071,-2.03076096165369,1,-1.12364985343476,0.130580798939219,0.439648778491807
CDK2,-1.50222602057607,-1.00510983257415,173,-0.0732660468866544,0.470797204860147,0.497140827662176
CDK3,-1.40660177556312,-0.941129534284456,5,0.143501192833943,0.442947184627294,0.497140827662176
CDK4,-1.77231397947824,-1.1858203644343,21,-0.928273584991725,0.176632836268321,0.453600157254674
CDK5,-1.357621762969,-0.908357972892465,50,0.706403312004139,0.239968680900033,0.467045079267581
CDK6,-2.04481935632135,-1.36814834300925,12,-1.39022953459944,0.0822295938149912,0.334791917675321
CDK7,-2.65344684806388,-1.77536900617602,11,-2.80335318827535,0.00252871259178448,0.0480455392439052
CDK8,-1.62133563228149,-1.08480372699444,1,-0.0924459685154856,0.463171859088419,0.497140827662176
CDK9,-1.63598005497222,-1.09460202168327,5,-0.230599550913135,0.408812958264119,0.497140827662176
CHEK1,-0.766053304867701,-0.512551173027335,20,2.37638643642035,0.00874157107987636,0.114985281127604
CHEK2,-1.34460765508846,-0.899650489721662,3,0.189473693988663,0.424860785404239,0.497140827662176
CHUK,-1.60023479175108,-1.07068557033746,9,-0.231166585768463,0.408592693844154,0.497140827662176
CLK1,-2.81893154986423,-1.88609155966791,11,-3.20367151525655,0.000678435960525636,0.0193354248749806
CLK4,-3.96160459085856,-2.6506315777408,1,-1.79938123328576,0.0359791980549915,0.219730102407269
CSNK1A1,-1.53044841408872,-1.02399288001828,12,-0.0906037228060426,0.463903736865303,0.497140827662176
CSNK1D,0.0879925013099025,0.0588740489433549,2,1.63242162745071,0.0512953480653523,0.265803167247735
CSNK1E,-0.957599810813519,-0.640711166187043,2,0.553900497800556,0.289823472211631,0.497140827662176
CSNK1G1,-3.53321818852898,-2.36400667627796,2,-2.10283177736318,0.0177402385820512,0.156822500915652
CSNK1G2,-1.41934167509285,-0.949653550050362,1,0.0548835115137759,0.478115633992006,0.497140827662176
CSNK2A1,-1.93976023089903,-1.29785535212955,59,-2.49404595559947,0.00631480958689329,0.0899860366132294
CSNK2A2,-1.80100653262963,-1.20501798642933,9,-0.670480661296729,0.251275715161506,0.467045079267581
DMPK,-1.63620969703962,-1.09475567066601,12,-0.357823509006969,0.360237698113416,0.497140827662176
DYRK1A,-0.963836726762759,-0.644884163765075,3,0.670507599874442,0.251267131679561,0.467045079267581
DYRK1B,-1.50549116302412,-1.00729447505427,1,-0.00795182989125075,0.496827712281326,0.497140827662176
DYRK2,-1.4665938509462,-0.981269049922016,5,0.0456581011621606,0.481791379693674,0.497140827662176
EGFR,-0.330045593151681,-0.220827003613817,1,0.849389582803978,0.197832273895872,0.453600157254674
EIF2AK2,-1.04786342756654,-0.701104773726454,6,0.798118984924899,0.212400722642017,0.453600157254674
ERBB2,-0.330045593151681,-0.220827003613817,1,0.849389582803978,0.197832273895872,0.453600157254674
FER,-0.330045593151681,-0.220827003613817,1,0.849389582803978,0.197832273895872,0.453600157254674
GRK1,-2.90464684778836,-1.94344197669272,1,-1.02846195992349,0.151866287916353,0.453600157254674
GRK7,-2.90464684778836,-1.94344197669272,1,-1.02846195992349,0.151866287916353,0.453600157254674
GSK3A,-1.04967909532298,-0.70231960124887,8,0.917842724494782,0.179350605436931,0.453600157254674
GSK3B,-1.26185342364665,-0.844281263939391,52,1.22409628318598,0.110457954003955,0.419740225215029
HIPK2,-1.45341543471988,-0.972451631274359,27,0.156045341068369,0.437998640971454,0.497140827662176
ICK,-2.42560085695516,-1.6229217426889,1,-0.679057464255098,0.248550726187849,0.467045079267581
IRAK1,0.471800147575928,0.315672183042503,1,1.4342363657934,0.0757524113093828,0.315942983753767
JAK2,-0.330045593151681,-0.220827003613817,1,0.849389582803978,0.197832273895872,0.453600157254674
LATS1,-1.445367390064,-0.967066843162699,3,0.0621823351540403,0.475208814884432,0.497140827662176
LATS2,-0.80815606129642,-0.540721297819044,1,0.50066743463333,0.308302597355337,0.497140827662176
LIMK1,-1.65967031964631,-1.11045271101634,2,-0.170280303359561,0.432394850341612,0.497140827662176
LIMK2,-1.65967031964631,-1.11045271101634,2,-0.170280303359561,0.432394850341612,0.497140827662176
LMTK2,-0.911966993431013,-0.610179147162616,1,0.424950265339699,0.335436465441071,0.497140827662176
MAK,-1.33722603666126,-0.894711594269267,4,0.229553322387981,0.409219440787969,0.497140827662176
MAP2K1,-0.41240384942753,-0.275931290214295,8,2.23253260913139,0.0127898912493106,0.129114414711559
MAP2K2,-0.0591757945387871,-0.039593358207518,6,2.564506578506,0.00516613103424573,0.0803098551687291
MAP2K4,-2.19897752591491,-1.47129253696397,2,-0.72657190056157,0.233744123459569,0.46477029199519
MAP2K5,-0.844592499039276,-0.565100200419383,3,0.821150709285085,0.205780214369733,0.453600157254674
MAP2K6,-1.06996717437806,-0.715893955216247,5,0.692529875927884,0.244302315332474,0.467045079267581
MAP2K7,-1.85999943856776,-1.24448897747753,2,-0.376918383169272,0.353117129743123,0.497140827662176
MAP3K10,-0.391004289925509,-0.26161326657895,1,0.804927791847715,0.210430674825163,0.453600157254674
MAP3K7,-3.06307221285183,-2.04944126706141,1,-1.14401356841269,0.12630900499701,0.439648778491807
MAP3K8,-3.48785165259725,-2.33365282092581,2,-2.0560365140334,0.0198894983847082,0.156822500915652
MAP4K4,-1.69399678491144,-1.13341987260383,1,-0.145443246178103,0.442180461067466,0.497140827662176
MAP4K5,-0.215225711914606,-0.14400328333095,1,0.933136411843434,0.175374770592462,0.453600157254674
MAPK1,-0.707916324433572,-0.473652864869881,62,4.51794714302708,3.12210329880542e-06,0.000533879664095726
MAPK10,-0.047086417552996,-0.0315045942587651,2,1.49308867092956,0.067706988835523,0.310303880311994
MAPK11,-1.25716235903782,-0.841142565035898,13,0.624384709943733,0.266187482045422,0.489441499244807
MAPK12,-1.30667627655967,-0.874271351695708,12,0.474786002808387,0.317469755344633,0.497140827662176
MAPK13,-0.559440096054469,-0.37431034583261,11,2.26218622734433,0.0118429499394445,0.129114414711559
MAPK14,-1.46750527050261,-0.981878862789856,5,0.0441716363809339,0.482383795433683,0.497140827662176
MAPK15,-0.199240955810347,-0.133308197963218,1,0.944795304208396,0.17238169484359,0.453600157254674
MAPK3,-0.788584604542195,-0.527626421713831,54,3.78403822811875,7.71520535018625e-05,0.00659650057440924
MAPK6,-1.87514104020575,-1.25461992480424,2,-0.39253683896124,0.347330798705548,0.497140827662176
MAPK7,-1.32950452811624,-0.88954528503577,12,0.417107423936381,0.338299917489089,0.497140827662176
MAPK8,-1.27983362104535,-0.856311459761803,15,0.606653628744812,0.272040401014003,0.494882006099942
MAPK9,-1.545516043664,-1.03407433409527,6,-0.0909863074066644,0.463751735515625,0.497140827662176
MAPKAPK2,0.118384257846865,0.0792085744449079,5,2.63065215922988,0.00426106054126585,0.072864135255646
MAPKAPK3,0.492945225716658,0.329819938212958,2,2.05012751981244,0.0201759942698499,0.156822500915652
MAPKAPK5,0.492945225716658,0.329819938212958,2,2.05012751981244,0.0201759942698499,0.156822500915652
MARK1,-1.43781643082307,-0.962014645108295,7,0.109556524312772,0.456380545801326,0.497140827662176
MARK2,-2.38201303583627,-1.59375799037266,3,-1.12109684899457,0.131123319901065,0.439648778491807
MARK4,-3.3320731360903,-2.22942448477643,1,-1.34021629991868,0.0900875169145213,0.358255009125189
MOK,0.105068120704355,0.0702990094456874,1,1.16675094404581,0.121655481491491,0.439648778491807
MTOR,-2.13246338924381,-1.42678923862031,18,-1.97388910659086,0.0241971768469982,0.174883620127706
NEK2,-1.48291136754521,-0.992186778780537,5,0.0190453150190111,0.49240247789876,0.497140827662176
NEK6,0.471800147575928,0.315672183042503,1,1.4342363657934,0.0757524113093828,0.315942983753767
NLK,-1.48788701190472,-0.995515884388236,5,0.0109303694352042,0.495639500319041,0.497140827662176
NUAK1,-2.74983216830562,-1.83985852490612,3,-1.58576854735465,0.0563959115085066,0.275534310512989
NUAK2,-2.93657019659318,-1.96480126040431,1,-1.05174607418941,0.146458033033302,0.453600157254674
OXSR1,-0.839286606906345,-0.561550132533233,1,0.47796157173737,0.316338778237245,0.497140827662176
PAK1,-0.944404903130789,-0.631882713430823,24,1.96591560696935,0.0246541799699296,0.174883620127706
PAK2,-1.19005980020791,-0.796245565019239,23,1.0652315624947,0.143385576987368,0.453600157254674
PAK3,-1.5415459862173,-1.03141804687823,4,-0.0684986822032678,0.472694334531661,0.497140827662176
PAK4,-1.6636669043107,-1.11312674707209,13,-0.444641518814932,0.328289419027855,0.497140827662176
PAK5,-2.22540950253221,-1.48897765173933,2,-0.753836298883593,0.225473762378055,0.453600157254674
PAK6,-2.22540950253221,-1.48897765173933,2,-0.753836298883593,0.225473762378055,0.453600157254674
PBK,-0.199240955810347,-0.133308197963218,1,0.944795304208396,0.17238169484359,0.453600157254674
PDK1,-1.12409622973823,-0.752110639673353,8,0.764321221047864,0.222337921112266,0.453600157254674
PIM1,-1.06766505076234,-0.714353649662844,6,0.762741439603818,0.222808805765832,0.453600157254674
PIM2,-1.13528741932917,-0.759598444132864,3,0.453911241862838,0.324946355939103,0.497140827662176
PIM3,-1.13528741932917,-0.759598444132864,3,0.453911241862838,0.324946355939103,0.497140827662176
PKD1,-1.33631243452008,-0.894100321076963,8,0.326522170198733,0.372014659134728,0.497140827662176
PKD2,-1.0926086276069,-0.731042905475646,1,0.293194650443179,0.384686686421068,0.497140827662176
PKD3,-0.936905719937086,-0.626865157709498,1,0.406760564717613,0.342091926541787,0.497140827662176
PKM,-0.330045593151681,-0.220827003613817,1,0.849389582803978,0.197832273895872,0.453600157254674
PLK1,-1.72935723635324,-1.15707885396989,35,-1.01303577756138,0.155521536033189,0.453600157254674
PLK2,-3.1750184491512,-2.1243422881348,1,-1.22566443071952,0.110162490341265,0.419740225215029
PLK3,-0.199240955810347,-0.133308197963218,1,0.944795304208396,0.17238169484359,0.453600157254674
PLK4,-1.22515483365995,-0.819726960437781,1,0.196518671174105,0.422102110052401,0.497140827662176
PNCK,-1.52530566490175,-1.02055196786293,1,-0.0224040456867156,0.491062826585796,0.497140827662176
PRKAA1,-1.81461250449657,-1.21412147413216,16,-0.93366967503245,0.175237156142419,0.453600157254674
PRKAA2,-2.07598861959902,-1.38900308295209,14,-1.58668274383894,0.0562922582640493,0.275534310512989
PRKACA,-1.10528147279141,-0.739522056500306,39,1.77327583321473,0.0380915057727711,0.224608534039443
PRKACB,-1.54861459974173,-1.0361475169172,7,-0.104255872487583,0.458483147833625,0.497140827662176
PRKACG,-1.71811863074756,-1.14955932438914,8,-0.461138651879084,0.322349566237274,0.497140827662176
PRKCA,-1.31687942734777,-0.881098078859186,9,0.388850949638139,0.348693204304681,0.497140827662176
PRKCB,0.348053421794371,0.232875686957179,3,2.3278390695546,0.0099603253161416,0.121658259218587
PRKCD,-0.0262316684323355,-0.0175510925153957,11,3.55205231983359,0.000191119424099575,0.00817035538025682
PRKCE,-1.0725886130519,-0.7176479081837,22,1.44369478418734,0.0744124246277064,0.315942983753767
PRKCG,-1.49731420080279,-1.00182343073959,13,-0.00716694357866554,0.497140827662176,0.497140827662176
PRKCH,-1.76175167687555,-1.17875333586791,4,-0.3897240332554,0.348370311499022,0.497140827662176
PRKCI,-2.04506056395442,-1.36830973028412,15,-1.55500524960783,0.0599724095373798,0.284868945302554
PRKCQ,-1.46942485904043,-0.983163221659581,4,0.0367081102570538,0.485358870976475,0.497140827662176
PRKCT,-1.6968872389378,-1.13535381844334,5,-0.329935123922759,0.370724491547574,0.497140827662176
PRKCZ,-1.07178881382517,-0.717112778279234,3,0.534130029463567,0.296625787400222,0.497140827662176
PRKD1,-1.64156305037148,-1.09833749390526,14,-0.401103259819297,0.344172050460816,0.497140827662176
PRKD2,-2.43558066523863,-1.62959903578296,3,-1.18876967820389,0.117265156497102,0.435920473065313
PRKD3,-2.10546299820739,-1.40872380895637,1,-0.445556695601191,0.327958748635144,0.497140827662176
PRKDC,-1.71436116494805,-1.14704527805462,29,-0.863223230608321,0.1940073717662,0.453600157254674
PRKG1,-0.626341267775666,-0.419072601702682,7,1.67549801277265,0.0469182803265484,0.250719560494993
PRKG2,-1.14398412502994,-0.765417238569332,2,0.361646386148253,0.358808148215708,0.497140827662176
RAF1,-1.0845535064665,-0.725653382627619,38,1.84359043228519,0.032621425716801,0.208208120076398
RET,-0.330045593151681,-0.220827003613817,1,0.849389582803978,0.197832273895872,0.453600157254674
ROCK1,-0.994023076287963,-0.665081255482117,5,0.81638965747256,0.207138655020678,0.453600157254674
ROCK2,-1.56402928715223,-1.04646118055378,10,-0.160163399514941,0.436376180050899,0.497140827662176
RPS6KA1,0.0474811908014416,0.0317687292612315,10,3.55676685831067,0.000187723537811064,0.00817035538025682
RPS6KA2,-0.535431745433837,-0.358246831459832,9,2.09875775450756,0.0179191303026498,0.156822500915652
RPS6KA3,-0.0953505300000945,-0.0637971609674954,11,3.38484926888914,0.000356086752361254,0.0121781669307549
RPS6KB1,-0.50325717141746,-0.336719457908983,16,2.89221307997925,0.00191269204049887,0.0408837923656634
RPS6KB2,-0.245768838704248,-0.16443908768618,6,2.23113977259881,0.0128359359654766,0.129114414711559
SGK1,-2.42560085695516,-1.6229217426889,1,-0.679057464255098,0.248550726187849,0.467045079267581
SGK3,-0.215225711914606,-0.14400328333095,1,0.933136411843434,0.175374770592462,0.453600157254674
SRC,-0.446461606375462,-0.298718664361002,1,0.764478573910172,0.222291050134227,0.453600157254674
STK10,1.02828748163468,0.688006894000934,1,1.84012469389412,0.0328749663278523,0.208208120076398
STK3,-1.80686447830171,-1.20893742246162,2,-0.322110044674825,0.373684664474304,0.497140827662176
STK38,-1.17856017165088,-0.788551390124585,2,0.32598143679077,0.372219199986,0.497140827662176
STK38L,-0.80815606129642,-0.540721297819044,1,0.50066743463333,0.308302597355337,0.497140827662176
TESK1,-1.70209024087814,-1.13883504452883,1,-0.15134641613333,0.439851228085686,0.497140827662176
TGFBR2,-1.11726009555018,-0.74753671697791,1,0.275214469230878,0.391575735605996,0.497140827662176
TLK1,-1.75139383149012,-1.17182310559724,2,-0.264892461905718,0.395546152751006,0.497140827662176
TRPM7,-1.42376426051248,-0.952612614818097,1,0.0516577852627209,0.479400687390205,0.497140827662176
TTK,-1.69026715184706,-1.13092444860401,15,-0.552763579512803,0.290212655293961,0.497140827662176
UHMK1,-2.65398208763576,-1.77572712442794,4,-1.69126635970071,0.0453929709740751,0.250393485050543
ULK1,0.056286387209682,0.0376601126925178,1,1.1311707339706,0.128991618646573,0.439648778491807
VRK1,-0.199240955810347,-0.133308197963218,1,0.944795304208396,0.17238169484359,0.453600157254674
WNK1,-1.50543473599592,-1.00725672084146,1,-0.00791067338914656,0.496844130833717,0.497140827662176
WNK2,-1.50543473599592,-1.00725672084146,1,-0.00791067338914656,0.496844130833717,0.497140827662176

## Sheet: KSEA Kinase Scores V600E all
Kinase.Gene,mS,Enrichment,m,z.score,p.value,FDR
ADRBK1,-2.19770778778155,-1.46677029294176,9,-1.50000917313912,0.0668060131941077,0.219049142488374
AKT1,-1.20213182070592,-0.802313780118749,53,1.54164288867307,0.0615801986605001,0.20647478374403
AKT2,-1.28199439097443,-0.855614790489231,22,0.725443343272937,0.234090045443069,0.333888836362934
AKT3,-0.662365914257765,-0.4420690737376,11,1.98219433156373,0.0237287474327132,0.126800494093561
ALK,-2.93101749358022,-1.95618790249444,1,-1.02426585887096,0.152854859563856,0.293687426802464
ARAF,-0.589168954011244,-0.393216752505389,12,2.25161253173489,0.012173384216853,0.112072979850809
ATM,-1.6925238544423,-1.12960591193847,13,-0.500571293746621,0.308336434741074,0.379320362163479
ATR,-1.37603640787512,-0.918379293324929,6,0.214163486273732,0.415209784593778,0.452234860926981
AURKA,-1.39731839514481,-0.932583086420397,62,0.568635753726497,0.284801677912584,0.363440947186954
AURKB,-0.847756815378547,-0.565800658008027,24,2.27857975278134,0.0113460293302861,0.112072979850809
AURKC,-0.954278157248125,-0.636893976549846,2,0.550069928438878,0.291135705721128,0.36705305903067
BCKDK,-1.52049375100392,-1.01479144633118,1,-0.0158445567454106,0.49367920087389,0.49367920087389
BRAF,-1.52307725934663,-1.01651570344567,4,-0.0353831524755968,0.485887109338378,0.49124467335095
BUB1,-1.23279576921104,-0.822779180014802,1,0.189838456351951,0.424717860002198,0.457164423443671
CAMK1,-1.91601544787383,-1.27876624698851,2,-0.422303458574261,0.336401767016979,0.394004809314407
CAMK1D,0.259271029726526,0.173039858318548,1,1.25655707924782,0.104457032443033,0.251253464879603
CAMK1G,-3.54359884188604,-2.36503030124308,1,-1.46221671518769,0.0718409162796774,0.223359939705906
CAMK2A,-1.94930985558872,-1.30098723943746,6,-0.789756412897138,0.214835019361803,0.322252529042705
CAMK2B,-1.83623907309879,-1.22552276427932,9,-0.724738099844917,0.234306358395057,0.333888836362934
CAMK2D,-1.19214327798947,-0.795647335285763,9,0.656706042055309,0.255684974335223,0.343121442780651
CAMK2G,-1.43853225654908,-0.960089594747524,3,0.0740484917671454,0.470485900144856,0.480125213961353
CAMK4,-2.37412235539936,-1.58451099007292,2,-0.885476686467821,0.187949794081487,0.319099584242891
CAMKK1,0.259271029726526,0.173039858318548,1,1.25655707924782,0.104457032443033,0.251253464879603
CDC7,-3.49773375567416,-2.33441952290721,3,-2.47583938150522,0.00664616810573378,0.103166958336477
CDK1,-1.22944618321468,-0.820543635662441,228,2.90265714243976,0.00185005737572386,0.0418301687665975
CDK16,-2.62762901858225,-1.75370365739963,1,-0.807365290824842,0.209728028943559,0.321847084517645
CDK19,-1.76256440456452,-1.17635161616345,1,-0.188907367601829,0.425082709517799,0.457164423443671
CDK2,-1.345343889512,-0.897894825644157,186,1.4916731602592,0.0678924242800225,0.219049142488374
CDK3,-0.724985323384503,-0.483861840537312,6,1.3542880493486,0.0878222486713039,0.240763674226062
CDK4,-1.46858341198897,-0.980146010943012,23,0.101995532183173,0.459380110695886,0.476068690519866
CDK5,-1.21628365769791,-0.811758845657406,47,1.38239755970492,0.0834248324943547,0.240763674226062
CDK6,-1.84067830778449,-1.22848555014037,11,-0.811754181411812,0.208466348915404,0.321847084517645
CDK7,-2.39684707432214,-1.59967767547882,9,-1.92711924419152,0.0269823854904869,0.130818117909559
CDK8,-2.20885797248411,-1.47421202826866,1,-0.507974624186758,0.305735569658706,0.379320362163479
CDK9,-1.96804828116708,-1.3134934361792,4,-0.671626618200934,0.25091071411009,0.343121442780651
CHEK1,-0.519602841744877,-0.346787692447883,17,2.8850163037044,0.00195696695984082,0.0418301687665975
CHEK2,-0.70796413914051,-0.472501746379854,3,0.978703419403431,0.163863271029774,0.298091695171184
CHUK,-2.13451429456273,-1.42459437716446,9,-1.36447299719106,0.0862093735810255,0.240763674226062
CLK1,-2.43450635542844,-1.6248118243804,10,-2.1165020428225,0.0171510658239641,0.112801240611456
CLK4,-2.04084615925381,-1.36207940632521,1,-0.387858467077118,0.349060387606674,0.406049838644498
CSNK1A1,-2.10071380941134,-1.40203562400233,14,-1.61138014174431,0.0535484463961794,0.193371711321567
CSNK1D,-2.61348929904178,-1.74426667915904,4,-1.59451285122759,0.0554106073377591,0.193371711321567
CSNK1E,-2.39655567256057,-1.59948319127598,4,-1.28432950090491,0.0995133443819163,0.250246792489819
CSNK1G1,-1.73959299789039,-1.16102028909439,4,-0.34496898418117,0.365058844054069,0.421541772266924
CSNK1G2,-1.81764905750604,-1.21311561772035,2,-0.322849209370759,0.373404721575136,0.425681382595655
CSNK2A1,-2.39996984195723,-1.60176183918083,53,-4.69279983503764,1.34745570107233e-06,7.68049749611229e-05
CSNK2A2,-1.83917084676734,-1.2274794568599,7,-0.644704430554378,0.259559372299236,0.34406707490829
DMPK,-2.20485146750947,-1.47153805017749,11,-1.67526123070445,0.0469414942722796,0.186665855118893
DYRK1A,-1.2974875529467,-0.865955068596723,3,0.24870268634587,0.401795385359076,0.443271038041304
DYRK1B,-1.29521734378615,-0.864439910223994,1,0.145211596403619,0.442271905187276,0.466737286388248
DYRK2,-2.4381779944791,-1.62726230988892,4,-1.34384333225653,0.0894995269107561,0.240763674226062
EGFR,-2.93101749358022,-1.95618790249444,1,-1.02426585887096,0.152854859563856,0.293687426802464
EIF2AK2,-1.04585332988054,-0.698012084942152,8,0.914964005536969,0.180105263323084,0.317505154930386
ERBB2,-2.93101749358022,-1.95618790249444,1,-1.02426585887096,0.152854859563856,0.293687426802464
FER,-2.93101749358022,-1.95618790249444,1,-1.02426585887096,0.152854859563856,0.293687426802464
GRK1,-3.82619542267985,-2.55363784584013,1,-1.66425259971653,0.0480309802645105,0.186665855118893
GRK7,-3.82619542267985,-2.55363784584013,1,-1.66425259971653,0.0480309802645105,0.186665855118893
GSK3A,-0.944232232369204,-0.630189234336414,13,1.4283040845971,0.0766021763436077,0.226295134344181
GSK3B,-1.11646775868457,-0.745140801052017,58,2.07914013832441,0.018802235897251,0.114827940658212
HIPK2,-1.68125857687938,-1.12208736258314,25,-0.653898239913327,0.256588683991196,0.343121442780651
ICK,-0.520494688679072,-0.347382919254741,3,1.21084489683716,0.112977427257621,0.264645754261002
IKBKB,-1.25985935066321,-0.840841661985943,2,0.241109235175939,0.404735227631946,0.44365207644271
IKBKE,-0.0160153937275684,-0.0106888203609069,1,1.05974742250995,0.144629761063916,0.293687426802464
IRAK1,0.312650010080104,0.208665478378431,1,1.2947191457551,0.0977085664034908,0.2493755948507
JAK2,-2.93101749358022,-1.95618790249444,1,-1.02426585887096,0.152854859563856,0.293687426802464
LATS1,-2.78915433996253,-1.86150713531224,2,-1.30509861491141,0.0959296351761907,0.2493755948507
LIMK1,-0.503842350461024,-0.336268996311005,2,1.0054872189472,0.157331150386397,0.295644249627186
LIMK2,-0.503842350461024,-0.336268996311005,2,1.0054872189472,0.157331150386397,0.295644249627186
LMTK2,-1.92177337195048,-1.28260913821891,1,-0.302730133823521,0.381047765621085,0.428772424915841
MAK,-0.952124854903405,-0.635456842856042,3,0.676361735737296,0.249405502593543,0.343121442780651
MAP2K1,-0.731797266913907,-0.488408193997802,15,2.12245583286603,0.0168997389399557,0.112801240611456
MAP2K2,0.264701839607802,0.176664430540914,12,4.36629123890924,6.31869774291778e-06,0.000270124328509735
MAP2K4,-2.70204659975404,-1.80337063220957,5,-1.92428948201104,0.0271591541157139,0.130818117909559
MAP2K5,-0.832368887594726,-0.555530614161103,3,0.824654308815815,0.204783939504794,0.321847084517645
MAP2K6,-0.379034526617585,-0.252971112325684,4,1.60043059160038,0.0547515465701234,0.193371711321567
MAP2K7,-1.93521326983721,-1.29157904908241,5,-0.69841051543156,0.242460251038969,0.339841827275932
MAP3K10,-0.285722438921482,-0.190693770922085,1,0.8669266131203,0.192991110358376,0.320402717196915
MAP3K11,-2.88080127490379,-1.92267313852629,1,-0.988364935620271,0.161486976878774,0.298091695171184
MAP3K7,-3.9461421427936,-2.63369138470311,1,-1.7500057310051,0.0400586624105424,0.171250781805069
MAP3K8,-1.56854697409045,-1.04686260724497,2,-0.0709922428957915,0.47170196459361,0.480125213961353
MAP4K4,-0.20982091488606,-0.140036399062588,1,0.921190650931754,0.1784754492373,0.317505154930386
MAP4K5,0.035848759805768,0.0239257904141039,1,1.0968264986439,0.13635862207489,0.293687426802464
MAPK1,-0.681957566333823,-0.455144721653386,71,4.91790108067681,4.37385473378604e-07,7.47929159477413e-05
MAPK10,0.0311959288572022,0.0208204484521839,5,2.4451404784061,0.00723978654992823,0.103166958336477
MAPK11,-0.744321828861743,-0.496767201277718,17,2.2226078904013,0.0131211258489105,0.112072979850809
MAPK12,-1.17257749727587,-0.782588954154079,15,0.901979541054645,0.183533867940261,0.319099584242891
MAPK13,-0.710454063974231,-0.474163545003886,13,2.03091533896619,0.0211317917462624,0.124604703055547
MAPK14,-1.67007567060403,-1.11462378857906,5,-0.274554908914572,0.39182910641894,0.435082968815836
MAPK15,-0.383325059790469,-0.255834653436043,1,0.797147878415843,0.212682576318678,0.321847084517645
MAPK3,-0.670152476242092,-0.447265896475481,65,4.77356006622063,9.04987664705969e-07,7.68049749611229e-05
MAPK6,0.148328705308482,0.0989959355591178,1,1.17724143224841,0.119549577955282,0.276256457166935
MAPK7,-1.30885881556415,-0.873544353347519,13,0.488404160733415,0.312631797667468,0.381857410008122
MAPK8,-0.774306420822353,-0.516779192397884,21,2.37205484547119,0.00884473234494941,0.103500361334447
MAPK9,-0.649309992746543,-0.433355432221605,9,1.82096432105867,0.0343061402914446,0.150419230508642
MAPKAPK2,0.309170873988697,0.206343471106877,5,2.88951818758802,0.00192916343467886,0.0418301687665975
MAPKAPK3,0.814452849518452,0.543573286365483,2,2.33836177958029,0.00968424433538686,0.103500361334447
MAPKAPK5,0.814452849518452,0.543573286365483,2,2.33836177958029,0.00968424433538686,0.103500361334447
MARK1,-1.54893786562077,-1.0337753087723,8,-0.102332544653765,0.459246361997889,0.476068690519866
MARK2,-2.24707538827324,-1.4997186813661,3,-0.92716208790516,0.17692119185076,0.317505154930386
MARK4,-4.17960764603547,-2.78950839845067,1,-1.91691648881379,0.0276242709722381,0.130818117909559
MKNK1,-4.47945814664033,-2.98963136705283,1,-2.13128766395663,0.0165327253617965,0.112801240611456
MOK,0.376092125855315,0.251007327125476,1,1.34007561801326,0.0901103809968888,0.240763674226062
MTOR,-2.14280190051754,-1.43012560123425,19,-2.00835991794494,0.0223025294810313,0.126800494093561
NEK2,-1.71713982279861,-1.14603483452671,8,-0.442456835138224,0.329079329567045,0.392407046570899
NEK6,0.312650010080104,0.208665478378431,1,1.2947191457551,0.0977085664034908,0.2493755948507
NLK,-1.7665376293526,-1.1790033827535,5,-0.428761412064037,0.334048431743306,0.393946771228312
NUAK1,-3.66842575707253,-2.4483409269655,2,-2.19409411741796,0.0141143220452804,0.112072979850809
OXSR1,0.431975324312562,0.288304285268578,2,1.95165433850884,0.0254896286018723,0.130818117909559
PAK1,-1.24932479797347,-0.833810805099216,24,0.872123234675371,0.191570576000513,0.320402717196915
PAK2,-1.21210141508069,-0.808967578655068,23,0.981387338503599,0.163200883790402,0.298091695171184
PAK3,-1.73541202647622,-1.1582298705046,4,-0.338990806699482,0.367308327881706,0.421541772266924
PAK4,-1.48656040815048,-0.992144022722658,12,0.0291514588771577,0.4883718974834,0.49124467335095
PAK5,-2.73389438966764,-1.82462613869721,2,-1.24922753082413,0.105790932580885,0.251253464879603
PAK6,-2.73389438966764,-1.82462613869721,2,-1.24922753082413,0.105790932580885,0.251253464879603
PBK,-0.383325059790469,-0.255834653436043,1,0.797147878415843,0.212682576318678,0.321847084517645
PDK1,-0.695952456235202,-0.464485039267246,12,1.98715472369414,0.0234526267394117,0.126800494093561
PIM1,-2.20143902187808,-1.46926055272936,5,-1.12400567027975,0.130505310224804,0.293687426802464
PIM2,-1.88125913624116,-1.25556956648419,3,-0.474175614605253,0.317687340564481,0.382567149553002
PIM3,-1.88125913624116,-1.25556956648419,3,-0.474175614605253,0.317687340564481,0.382567149553002
PKD1,-1.200890637407,-0.801485403024637,9,0.637944875601189,0.261754782136804,0.344308213426103
PKD2,-1.36541933253987,-0.911293360069271,1,0.0950223094217964,0.462148553370163,0.476068690519866
PKD3,-0.852355223815257,-0.568869677887411,2,0.653120053418386,0.256839442549259,0.343121442780651
PKM,-2.93101749358022,-1.95618790249444,1,-1.02426585887096,0.152854859563856,0.293687426802464
PLK1,-1.69403972261666,-1.13061761623261,34,-0.815850650791485,0.207292779930427,0.321847084517645
PLK2,-3.66710366540991,-2.44745855088891,1,-1.55051363015436,0.0605091422934268,0.20647478374403
PLK3,-0.383325059790469,-0.255834653436043,1,0.797147878415843,0.212682576318678,0.321847084517645
PLK4,-0.660930362893073,-0.441110973617361,1,0.598680392345475,0.274693017484616,0.353176736765935
PNCK,-3.54359884188604,-2.36503030124308,1,-1.46221671518769,0.0718409162796774,0.223359939705906
PRKAA1,-1.85891498346816,-1.24065687440993,17,-1.0628994558799,0.14391377490499,0.293687426802464
PRKAA2,-2.08614144549221,-1.39230989494346,17,-1.73269920044509,0.0415745733575427,0.173396391320483
PRKACA,-1.39461459284086,-0.930778544015136,35,0.43867633275781,0.330448039217599,0.392407046570899
PRKACB,-1.97242520208328,-1.31641463326014,7,-0.89675753042036,0.184924157267809,0.319099584242891
PRKACG,-2.20414647965785,-1.47106753483264,8,-1.42724200889407,0.0767550748067983,0.226295134344181
PRKCA,-0.802196778792858,-0.535393472584762,11,1.65063519819453,0.0494065435714302,0.187744865571435
PRKCB,0.402882815765948,0.268887678784055,4,2.71845800334853,0.00327934906140658,0.0623076321667251
PRKCD,-0.57597256636919,-0.384409362608005,11,2.18704541111642,0.0143696045414557,0.112072979850809
PRKCE,-0.807496930056716,-0.538930842049958,23,2.36864209018042,0.00892676053963819,0.103500361334447
PRKCG,-1.21746460366531,-0.812547019805113,14,0.751321504273168,0.226229595235987,0.330643254575673
PRKCH,-2.04678455886589,-1.36604274857982,7,-1.03740964146514,0.149772493439439,0.293687426802464
PRKCI,-2.00811993604176,-1.34023762541399,14,-1.36369047998384,0.0863325007734973,0.240763674226062
PRKCQ,-1.99609102878695,-1.33220942261287,4,-0.711723644881757,0.238317961414839,0.336796457867252
PRKCT,-2.39142156148968,-1.59605663855532,5,-1.42771651622391,0.0766867351640275,0.226295134344181
PRKCZ,-1.20762892360417,-0.805982596907416,2,0.293917291762265,0.384410552245476,0.429635323097884
PRKD1,-0.633642964624165,-0.422899114254154,12,2.1414691189743,0.016118113108474,0.112801240611456
PRKDC,-1.29822554819987,-0.866447613383478,28,0.75700739355827,0.224522716470285,0.330643254575673
PRKG1,-0.342804233982785,-0.228790683409357,7,2.18570094264386,0.0144187459457182,0.112072979850809
PRKG2,-0.640074079394611,-0.427191299115231,1,0.613591109498384,0.269742779967396,0.349439510412308
RAF1,-0.826095478376654,-0.551343683429141,54,3.53167001891051,0.000206472152798621,0.00706134762571283
RET,-2.93101749358022,-1.95618790249444,1,-1.02426585887096,0.152854859563856,0.293687426802464
ROCK1,-1.81330346112388,-1.21021532692014,5,-0.503522441985914,0.3072985030287,0.379320362163479
ROCK2,-2.64840083522195,-1.76756695794711,9,-2.46664686105637,0.00681923939800406,0.103166958336477
RPS6KA1,-0.555607299854261,-0.370817397334909,8,1.90629957572425,0.0283056746354017,0.130818117909559
RPS6KA2,-1.36452377327867,-0.910695655621386,10,0.302511604190103,0.381131044369636,0.428772424915841
RPS6KA3,-0.717586755180737,-0.478923968399842,11,1.85125775886061,0.032066239956782,0.144298079805519
RPS6KB1,-0.791869976856678,-0.528501270452479,17,2.08244931424839,0.0186507240060872,0.114827940658212
RPS6KB2,-0.650865959519042,-0.434393898687162,7,1.60299643976006,0.0544677200597409,0.193371711321567
SGK1,-1.34684127956343,-0.898894197469928,2,0.153165351084039,0.439133940524408,0.466737286388248
SGK3,0.035848759805768,0.0239257904141039,1,1.0968264986439,0.13635862207489,0.293687426802464
SRC,-0.883781580920254,-0.589843916261257,2,0.621346144267179,0.267185949369526,0.348769445360221
STK3,-2.95278205214983,-1.9707137680924,1,-1.03982592626328,0.149210390798915,0.293687426802464
STK38,-2.4511066070141,-1.63589098422894,1,-0.681164678417732,0.247883647584738,0.343121442780651
TESK1,-0.262493533526752,-0.175190586850039,1,0.883533581381835,0.188474023441707,0.319099584242891
TGFBR1,-0.484615119486498,-0.323436566373888,1,0.724732894670528,0.23430795534241,0.333888836362934
TLK1,-0.747161767305288,-0.498662602188583,2,0.759476871018409,0.223783672332272,0.330643254575673
TRPM7,-2.26452023249562,-1.51136153007085,1,-0.547769068637251,0.291925239930826,0.36705305903067
TTK,-1.82854882932572,-1.22039022519722,13,-0.851203610283256,0.197328128829492,0.321847084517645
UHMK1,-2.08970614118166,-1.39468900547387,4,-0.845579560511052,0.198893665930775,0.321847084517645
ULK1,-3.03980418126416,-2.02879313356723,1,-1.10204038328116,0.135222057766402,0.293687426802464
VRK1,-0.383325059790469,-0.255834653436043,1,0.797147878415843,0.212682576318678,0.321847084517645
WNK1,-1.3045307749257,-0.870655779411337,1,0.138553174376741,0.444901623867161,0.466737286388248
WNK2,-1.3045307749257,-0.870655779411337,1,0.138553174376741,0.444901623867161,0.466737286388248

## Sheet: KSEA Kinase Scores Kinase all
Kinase.Gene,mS,Enrichment,m,z.score,p.value,FDR
ADRBK1,-0.0225706956571624,-0.0322282704403695,3,0.881485670033708,0.189027503380152,0.456679996912057
AKT1,-0.653755363817444,-0.933484948225986,37,0.212766129511673,0.415754691780721,0.493691025495912
AKT2,-1.213845118419,-1.73322654043744,13,-1.39024566825543,0.0822271450380392,0.349071470860847
AKT3,-0.47584115085167,-0.679444600611493,7,0.445998927402143,0.327799010357242,0.493691025495912
ALK,0.58926526281256,0.841400749870646,1,0.968344774836644,0.166436105104903,0.448918504123411
ARAF,-0.0539086313663916,-0.0769751175212416,9,1.45618435648291,0.0726708314175293,0.349071470860847
ATM,-0.278110765024785,-0.397109113681774,4,0.634089281872941,0.263011278578394,0.472979148685442
ATR,-0.178582847786497,-0.254995078658473,3,0.67858064273687,0.248701805667439,0.472218618355897
AURKA,-0.780206615468851,-1.11404230443895,37,-0.36479472042669,0.357632323207813,0.493691025495912
AURKB,-1.0613681360875,-1.51550753446822,10,-0.857268201737907,0.195648338906061,0.456679996912057
AURKC,-0.611089163576255,-0.872562685973974,2,0.0947748934737541,0.462246814597016,0.493691025495912
BCKDK,0.356739993460309,0.509382305302854,1,0.793744907877104,0.21367197545358,0.456679996912057
BRAF,-0.842971331839943,-1.20366285863214,4,-0.214202003554719,0.415194766866227,0.493691025495912
CAMK2A,0.033419775480724,0.047719466808167,2,0.77918701924966,0.217934777761091,0.456679996912057
CAMK2B,-0.945835815757973,-1.35054111425947,3,-0.319287037985676,0.374754430450237,0.493691025495912
CAMK2D,-0.560465113855441,-0.800277560607384,2,0.148533206795991,0.440960990682255,0.493691025495912
CAMK2G,-0.25769979568457,-0.367964675697303,1,0.332370943068039,0.369804588331611,0.493691025495912
CAMK4,0.324539346646018,0.463403609313637,1,0.769565907179897,0.220778717512006,0.456679996912057
CDC7,-1.44132603954546,-2.05804225535588,3,-0.963707719392404,0.167596241539407,0.448918504123411
CDK1,-0.714181920304205,-1.01976688803929,166,-0.133928820547084,0.446729430042309,0.493691025495912
CDK16,-3.56316728542834,-5.08777933313814,1,-2.14965686215106,0.0157911835142727,0.188388906335318
CDK19,-1.18585189579139,-1.69325554605412,1,-0.364565065858252,0.357718047998466,0.493691025495912
CDK2,-0.620059938700242,-0.885371886503149,132,0.692563833457817,0.244291656791736,0.472218618355897
CDK3,-0.0336674532671677,-0.0480731212459756,3,0.867053538465534,0.192956337934625,0.456679996912057
CDK4,-1.06476989385543,-1.52036484019697,21,-1.25400506256172,0.1049200826666,0.414158221052368
CDK5,-0.541682318285858,-0.773457961227842,40,0.753460514972239,0.225586615004635,0.456679996912057
CDK6,-0.135204848315006,-0.193056451716516,8,1.20024483272272,0.115022134105008,0.426789400835396
CDK7,-1.24157006657017,-1.77281447075795,8,-1.14948136973605,0.125178772270606,0.426789400835396
CDK9,0.564604395901164,0.806187963335987,3,1.64514911774961,0.0499695317727272,0.312309573579545
CHEK1,-0.773308448756254,-1.10419254235217,11,-0.181724999164389,0.427899273065852,0.493691025495912
CHEK2,-1.04498272043878,-1.4921111086413,2,-0.365982116424746,0.357189210117995,0.493691025495912
CHUK,-1.18654287606999,-1.69424218375576,8,-1.03261324225651,0.150892464296211,0.448918504123411
CLK1,-0.271871744141745,-0.388200533487529,10,1.01739779423862,0.154482115455568,0.448918504123411
CSNK1A1,-2.33876011047925,-3.3394714314778,8,-3.47972110676967,0.000250967998484953,0.037645199772743
CSNK1D,-0.937631901926713,-1.3388269005002,2,-0.25198493585945,0.400526353811255,0.493691025495912
CSNK1E,-0.937631901926713,-1.3388269005002,2,-0.25198493585945,0.400526353811255,0.493691025495912
CSNK1G1,-2.16221777348302,-3.08738995967416,2,-1.55238803154545,0.0602847027308698,0.334915015171499
CSNK1G2,-3.5391753540459,-5.05352170702308,1,-2.13164166733311,0.0165181578019823,0.188388906335318
CSNK2A1,-1.04312772208336,-1.48946239149173,44,-1.70736888988071,0.0438767544859187,0.312309573579545
CSNK2A2,-2.19985222366888,-3.14112748096671,7,-2.97901879601483,0.00144586519558498,0.0658555481714438
DMPK,-0.296143298179658,-0.422857427516121,8,0.858439715939979,0.195324852489133,0.456679996912057
DYRK1A,-1.05603848293922,-1.50789742330349,2,-0.377722369284651,0.352818424251498,0.493691025495912
DYRK2,-1.16172085942285,-1.65879929455418,5,-0.774675507634541,0.219265713560757,0.456679996912057
EGFR,0.58926526281256,0.841400749870646,1,0.968344774836644,0.166436105104903,0.448918504123411
EIF2AK2,-0.618857999846211,-0.883655660692972,7,0.161873581412855,0.435702703695726,0.493691025495912
ERBB2,0.58926526281256,0.841400749870646,1,0.968344774836644,0.166436105104903,0.448918504123411
FER,0.58926526281256,0.841400749870646,1,0.968344774836644,0.166436105104903,0.448918504123411
GSK3A,-0.377388337969951,-0.538865686812695,8,0.685889462492813,0.246391407796711,0.472218618355897
GSK3B,-0.694258992814867,-0.991319315804776,39,0.028508079293902,0.488628462152348,0.493691025495912
HIPK2,-0.793343314255586,-1.13279994875898,16,-0.2793441601202,0.389990359831978,0.493691025495912
ICK,-0.465611482861142,-0.664837850712346,1,0.176253059530098,0.430047568854498,0.493691025495912
IKBKB,-0.717304858492353,-1.02422607255114,1,-0.0127398616359625,0.494917668027853,0.494917668027853
IRAK1,0.82473111923674,1.17761800323224,1,1.14515268616475,0.126072956906884,0.426789400835396
JAK2,0.58926526281256,0.841400749870646,1,0.968344774836644,0.166436105104903,0.448918504123411
LATS1,0.419907116393673,0.599577448233261,4,1.68235237663721,0.0462502651374368,0.312309573579545
LATS2,1.61420887651113,2.30489839611732,1,1.7379601335945,0.0411089193177349,0.312309573579545
LIMK1,0.000590130179755455,0.00084263574845321,2,0.744324807157179,0.228339998456028,0.456679996912057
LIMK2,0.000590130179755455,0.00084263574845321,2,0.744324807157179,0.228339998456028,0.456679996912057
LMTK2,0.524413858029739,0.748800652668264,1,0.919648791476373,0.178878160415524,0.456679996912057
MAP2K1,0.523929610487941,0.748109204740641,7,2.43219996226366,0.00750370976713641,0.140694558133808
MAP2K2,0.583922577120134,0.833772029782049,8,2.72754569736536,0.00319037094350322,0.0683650916464975
MAP2K4,-1.206700286153,-1.72302456926131,2,-0.537712027708403,0.295387937126439,0.493691025495912
MAP2K5,-2.01375611054042,-2.87540435249494,2,-1.3947347296697,0.0815479239397909,0.349071470860847
MAP2K6,-0.362022498916034,-0.51692509516701,2,0.359261908455166,0.359699583682308,0.493691025495912
MAP3K10,-1.174762526592,-1.67742124502062,1,-0.356238218663227,0.36083108624578,0.493691025495912
MAP3K7,-0.19174064826069,-0.273782853679848,1,0.381898714381048,0.351268246959635,0.493691025495912
MAP3K8,-2.0592206961725,-2.94032237644362,2,-1.44301414336643,0.0745082435488084,0.349071470860847
MAP4K5,0.123765494682932,0.176722414515473,1,0.618807721029365,0.268021517588417,0.472979148685442
MAPK1,-0.538111162331676,-0.76835877502533,47,0.83511537553557,0.201826375210506,0.456679996912057
MAPK10,-0.606559589694214,-0.866094992896746,1,0.070417161479927,0.471930816134258,0.493691025495912
MAPK11,-0.0748745195057317,-0.10691191358817,8,1.32837589836637,0.0920269787472478,0.373082346272626
MAPK12,-0.658326695676064,-0.940012266730036,9,0.0946379674337782,0.462301195755251,0.493691025495912
MAPK13,-1.1477272213289,-1.63881804276704,9,-1.00781339503901,0.156772027050445,0.448918504123411
MAPK14,-0.466685925613348,-0.666372027244465,3,0.30388186400136,0.380608947622492,0.493691025495912
MAPK3,-0.681669936063899,-0.973343639214116,38,0.0864120590814473,0.465569430513995,0.493691025495912
MAPK6,-0.881448051074339,-1.25860304000625,2,-0.192322599984927,0.423744758301461,0.493691025495912
MAPK7,-0.674040559546954,-0.962449796444965,9,0.0592400270432034,0.476380464318487,0.493691025495912
MAPK8,-1.36895138151024,-1.95469984679135,11,-1.66511753090736,0.0479446549148082,0.312309573579545
MAPK9,-0.282366192154402,-0.403185357784115,4,0.627698604311257,0.26510069991701,0.472979148685442
MAPKAPK2,-0.666625990330313,-0.951862672966699,3,0.0438454262276182,0.482513808493131,0.493691025495912
MAPKAPK3,-0.820663102766626,-1.17180935927434,1,-0.090350074709714,0.464004514483411,0.493691025495912
MAPKAPK5,-0.820663102766626,-1.17180935927434,1,-0.090350074709714,0.464004514483411,0.493691025495912
MARK1,-2.20000547509615,-3.141346305788,6,-2.75831735222835,0.00290498815438401,0.0683650916464975
MARK2,-0.453569049788256,-0.647642687757329,2,0.262047477912766,0.39664241932305,0.493691025495912
MARK4,-0.487628010697593,-0.696274835378164,1,0.159721166708884,0.436550363168501,0.493691025495912
MOK,-0.606559589694214,-0.866094992896746,1,0.070417161479927,0.471930816134258,0.493691025495912
MTOR,-1.64014121164571,-2.34192668813642,16,-2.82273741174923,0.00238077765539087,0.0683650916464975
NEK2,-1.14839361654683,-1.63976957592445,5,-0.752298651645946,0.225935739270009,0.456679996912057
NEK6,0.82473111923674,1.17761800323224,1,1.14515268616475,0.126072956906884,0.426789400835396
NLK,-0.817893828051115,-1.16785516416175,3,-0.152889278876817,0.439242795362715,0.493691025495912
NUAK1,0.90196143821793,1.28789371843963,2,1.70150230410618,0.0444243527648336,0.312309573579545
NUAK2,-0.358785216575716,-0.512302640797843,1,0.256467360251816,0.398794990264084,0.493691025495912
PAK1,-0.754622533962314,-1.07751127720411,21,-0.186791125208974,0.425912202754303,0.493691025495912
PAK2,-0.45443555234636,-0.648879950409931,19,0.804848478574868,0.21045356126301,0.456679996912057
PAK3,-0.286637859471379,-0.409284790943551,3,0.538047326605795,0.295272187836911,0.493691025495912
PAK4,-1.00536274141694,-1.43553848818898,11,-0.75963432329623,0.223736598299483,0.456679996912057
PAK5,-0.648208473140443,-0.925564647693076,2,0.0553574330994554,0.477926853636101,0.493691025495912
PAK6,-0.648208473140443,-0.925564647693076,2,0.0553574330994554,0.477926853636101,0.493691025495912
PDK1,0.0102268283269503,0.0146026951971059,7,1.41164901499225,0.0790266662712492,0.349071470860847
PIM1,-0.881968206017716,-1.25934575943505,4,-0.272766382920838,0.392516401252673,0.493691025495912
PIM2,-0.746407896127225,-1.06578175084213,3,-0.059916681740074,0.4761109968287,0.493691025495912
PIM3,-0.746407896127225,-1.06578175084213,3,-0.059916681740074,0.4761109968287,0.493691025495912
PKD1,-0.84425100061642,-1.20549007353189,7,-0.285904878101687,0.38747548872493,0.493691025495912
PKD2,-1.2825730778044,-1.83136189680978,1,-0.43719160472297,0.330986198836204,0.493691025495912
PKD3,-1.19254093066126,-1.7028066927288,1,-0.369587765548571,0.355844834160075,0.493691025495912
PKM,0.58926526281256,0.841400749870646,1,0.968344774836644,0.166436105104903,0.448918504123411
PLK1,-0.835627519056226,-1.19317676692934,20,-0.45430925995588,0.324803126062864,0.493691025495912
PLK2,1.79569116482773,2.56403353119891,1,1.87423256318403,0.0304491888790954,0.268669313639077
PRKAA1,-0.53426355229803,-0.762864845259187,13,0.449623824954307,0.326490853010845,0.493691025495912
PRKAA2,-0.812783026467012,-1.16055754701599,10,-0.267000713671105,0.394734305801355,0.493691025495912
PRKACA,-0.523892105279896,-0.748055651761762,23,0.635404426884883,0.262582340807179,0.472979148685442
PRKACB,-0.494300741755563,-0.705802702147476,5,0.345943662876632,0.364692526984095,0.493691025495912
PRKACG,-0.494300741755563,-0.705802702147476,5,0.345943662876632,0.364692526984095,0.493691025495912
PRKCA,0.503178465935369,0.718479036989242,6,2.21361231219616,0.0134277298137682,0.188388906335318
PRKCB,0.188963957949645,0.269818069978327,3,1.15660170476884,0.123717562724427,0.426789400835396
PRKCD,-0.68251040880236,-0.97454373437841,8,0.0378635548146142,0.484898235622029,0.493691025495912
PRKCE,0.269411289256894,0.384687296383995,17,3.00232613191487,0.0013396248636838,0.0658555481714438
PRKCG,0.0858059213930574,0.122520656077474,13,2.12837287464787,0.016653090151822,0.188388906335318
PRKCH,-0.631979781226563,-0.902392004729898,6,0.12573110026249,0.449972391382075,0.493691025495912
PRKCI,-0.762091194549677,-1.08817563672998,11,-0.153789485785989,0.438887862168407,0.493691025495912
PRKCQ,-0.61435019002125,-0.877219044102179,4,0.129134624390106,0.448625562534113,0.493691025495912
PRKCT,-0.52211696704621,-0.745520965373126,6,0.327800288581215,0.371531334556436,0.493691025495912
PRKCZ,0.677883996172702,0.967937767080717,2,1.46355165803292,0.0716582446373224,0.349071470860847
PRKD1,-1.01729845166727,-1.45258126363943,10,-0.752624355763638,0.225837838769459,0.456679996912057
PRKDC,0.072549479935077,0.103592033456614,12,2.0103926025986,0.0221948263990751,0.221948263990751
PRKG1,-1.52769290588731,-2.18136387414122,5,-1.38915397521907,0.0823929668401199,0.349071470860847
PRKG2,-1.36458574198995,-1.94846623249597,2,-0.705372573451292,0.240289203701295,0.472218618355897
RAF1,-0.052451204603006,-0.0748940853461204,36,2.91893487722916,0.0017561479512385,0.0658555481714438
RET,0.58926526281256,0.841400749870646,1,0.968344774836644,0.166436105104903,0.448918504123411
ROCK1,0.377983257278086,0.539715160867195,4,1.61939233582613,0.05268143740953,0.31608862445718
ROCK2,-0.164064611008135,-0.234264762308568,5,0.900420414647971,0.183948280374292,0.456679996912057
RPS6KA1,-0.00565109354455416,-0.00806908984127495,7,1.38010503904083,0.0837771530066033,0.349071470860847
RPS6KA2,-0.269199322536047,-0.384384633102917,7,0.856525249152362,0.19585365643233,0.456679996912057
RPS6KA3,-0.0191072916306119,-0.0272829411821411,8,1.4468157357858,0.0739742691763363,0.349071470860847
RPS6KB1,0.213296337412966,0.304561815484139,12,2.37649542944532,0.00873898896287848,0.145649816047975
RPS6KB2,-0.0828596651394605,-0.118313752366138,6,1.13572030338859,0.128036820250619,0.426789400835396
SGK1,-0.461834861909363,-0.659445284916703,3,0.310191021332001,0.378207848984125,0.493691025495912
SGK3,0.123765494682932,0.176722414515473,1,0.618807721029365,0.268021517588417,0.472979148685442
SRC,-0.821446488259294,-1.17292794063755,1,-0.0909383075636266,0.463770805624653,0.493691025495912
STK3,1.09560934700411,1.56439991343556,2,1.90713944716634,0.0282512661169064,0.264855619845997
STK38,0.919289446717417,1.31263605481229,3,2.10644254223869,0.0175829645912963,0.188388906335318
STK38L,1.61420887651113,2.30489839611732,1,1.7379601335945,0.0411089193177349,0.312309573579545
TESK1,-0.553635997139713,-0.790526393708216,1,0.110156722882342,0.456142541734069,0.493691025495912
TGFBR1,-1.11341984961296,-1.58983119404275,1,-0.310176888342791,0.378213222412569,0.493691025495912
TGFBR2,0.851903329937328,1.21641669017672,1,1.16555590679765,0.121897022004871,0.426789400835396
TTK,-0.355099701962842,-0.507040164024428,6,0.63499288547944,0.262716527549874,0.472979148685442
UHMK1,-0.817881627312022,-1.16783774295662,4,-0.176523009913877,0.429941536606654,0.493691025495912
ULK1,-2.82030365461605,-4.02705837186215,1,-1.59185128914721,0.0557090613458198,0.321398430841268
WNK1,-0.732389333544382,-1.04576490984761,1,-0.024066576124137,0.490399751992606,0.493691025495912
WNK2,-0.732389333544382,-1.04576490984761,1,-0.024066576124137,0.490399751992606,0.493691025495912

## Sheet: KSEA Kinase Scores WT all
Kinase.Gene,mS,Enrichment,m,z.score,p.value,FDR
ADRBK1,-3.12809579011319,-1.59363314797588,5,-2.18253745104578,0.0145349451897526,0.229015157916617
AKT1,-1.7337224906596,-0.883258639086135,55,1.42352354735084,0.0772922204785005,0.307201025123088
AKT2,-1.53335975365019,-0.781182257561444,22,1.68753361436733,0.0457503960067446,0.307201025123088
AKT3,-1.46907395566439,-0.748431349185154,11,1.37186514499571,0.0850527113415623,0.307201025123088
ALK,-1.55029134886089,-0.789808192694623,1,0.345600485056788,0.364821490692803,0.439410460521107
ARAF,-2.22882937891705,-1.13549476031109,11,-0.738885939874678,0.229988130358455,0.410878924295873
ATM,-1.21009497689677,-0.616492459558606,9,1.89170634714969,0.0292650585976705,0.281495860323775
ATR,-1.31851594142197,-0.671728377700558,4,1.07949813412317,0.140182862565909,0.383667706797889
AURKA,-2.33053302895454,-1.18730848944373,64,-2.46380315719761,0.006873579292467,0.144345165141807
AURKB,-1.84271595131969,-0.938786219913265,22,0.472083800918755,0.318433487261994,0.439410460521107
AURKC,-2.14558902851272,-1.09308730524761,3,-0.265099949209133,0.395466233231664,0.458195359882204
BCKDK,-1.10628649634981,-0.563606407870699,1,0.717524812451158,0.236525165994674,0.410878924295873
BRAF,-2.51315397582903,-1.2803461756213,4,-0.921898674554656,0.178290715295087,0.388997924280189
BUB1,-3.93457484115484,-2.0045002809295,1,-1.65161425071412,0.0493066065306875,0.307201025123088
CAMK1,-1.63838383132185,-0.834687604821637,3,0.470787154584085,0.318896369268056,0.439410460521107
CAMK1G,-3.58761829069319,-1.82774052137526,1,-1.36098323410311,0.0867594939312498,0.307201025123088
CAMK2A,-1.51578208496041,-0.772227175182987,5,0.83742412664904,0.201177104424449,0.410878924295873
CAMK2B,-1.89962602265287,-0.967779505993853,6,0.129767631752471,0.44837513622399,0.485400322125187
CAMK2D,-1.96365636380354,-1.00040026986446,5,-0.00147162262195803,0.499412907727214,0.499412907727214
CAMK2G,-0.971843091121386,-0.495113151437841,2,1.1739986971973,0.120197773728688,0.363886213192584
CAMK4,-1.68400898405249,-0.857931699840346,3,0.404591142222562,0.342889035303792,0.439410460521107
CDC42BPA,-0.115110489116896,-0.0586439493688791,1,1.54779157132703,0.0608362432318881,0.307201025123088
CDC7,-3.62883529741635,-1.84873885153573,4,-2.79101799958486,0.00262712751325004,0.110339355556502
CDK1,-2.19773206340377,-1.1196519868987,212,-2.86448402216494,0.00208844613124621,0.110339355556502
CDK16,-2.61709638483951,-1.33330045822451,1,-0.548017553627523,0.291839924924152,0.433885906081926
CDK19,-2.34634398901472,-1.19536350813365,1,-0.321219575772011,0.374021999134038,0.439410460521107
CDK2,-2.20106426164364,-1.12134960165444,172,-2.61674339978066,0.00443865239666728,0.124282267106684
CDK3,-1.81475744132191,-0.924542535803179,5,0.277425110326218,0.39072685138461,0.455847993282045
CDK4,-2.65268970969542,-1.35143375916636,21,-2.64796160931134,0.00404893603251646,0.124282267106684
CDK5,-1.95677628845464,-0.996895161046744,49,0.0357351555903688,0.485746769168645,0.496350109423521
CDK6,-2.58552667930082,-1.3172170219764,11,-1.72986170748694,0.0418274931245007,0.292792451871505
CDK7,-2.70479628297601,-1.37797986516153,10,-1.96529262621168,0.0246901892747856,0.281495860323775
CDK9,-2.2008563352684,-1.12124367191758,5,-0.445761587884215,0.32788473570405,0.439410460521107
CHEK1,-1.82740461815418,-0.930985740097598,19,0.494622871560507,0.310433177209335,0.439410460521107
CHEK2,-1.50425385014075,-0.76635402474932,3,0.665391870643518,0.252899941578135,0.412496992088608
CHUK,-1.28733272523272,-0.655841841509192,7,1.49715114977365,0.0671769664925754,0.307201025123088
CLK1,-2.60389905592025,-1.32657697459689,11,-1.78090380958221,0.0374640830887428,0.286652438168229
CLK4,-2.83792095963819,-1.44580128489329,1,-0.732993080335533,0.23178132490596,0.410878924295873
CSNK1A1,-2.20637469529292,-1.12405504409018,13,-0.735435623200268,0.231037116636044,0.410878924295873
CSNK1D,-3.30531797793132,-1.6839203936403,3,-1.94771200148993,0.0257247166290203,0.281495860323775
CSNK1E,-2.76667920907508,-1.40950661144498,4,-1.34663368057662,0.0890491205843932,0.307201025123088
CSNK1G1,-2.25518724639392,-1.14892298442554,3,-0.424112348104466,0.33574194026279,0.439410460521107
CSNK1G2,-1.6902763321108,-0.861124649892318,2,0.322922810454558,0.37337685038538,0.439410460521107
CSNK2A1,-2.47331838519509,-1.26005161881646,48,-2.96236616825957,0.0015264224585713,0.110339355556502
CSNK2A2,-2.28047117057787,-1.16180407963298,7,-0.703877440891902,0.240754550704117,0.410878924295873
DMPK,-1.49993621124724,-0.764154369456331,8,1.09680996360457,0.13636223688048,0.383601797062022
DYRK1A,-2.66534335975323,-1.35788026129675,3,-1.01919417304382,0.154055396224161,0.386288157696403
DYRK1B,-2.66730102011775,-1.35887760685734,1,-0.590071880516834,0.277571229966385,0.427816207654611
DYRK2,-1.98062350345827,-1.00904431339585,5,-0.033252106579207,0.486736773015578,0.496350109423521
EGFR,-1.55029134886089,-0.789808192694623,1,0.345600485056788,0.364821490692803,0.439410460521107
EIF2AK2,-2.32901785487172,-1.18653657202005,5,-0.685815904673828,0.246414602785729,0.410878924295873
ERBB2,-1.55029134886089,-0.789808192694623,1,0.345600485056788,0.364821490692803,0.439410460521107
FER,-1.55029134886089,-0.789808192694623,1,0.345600485056788,0.364821490692803,0.439410460521107
GRK1,-2.61806566201794,-1.33379426415143,1,-0.54882947665181,0.291561239729665,0.433885906081926
GRK7,-2.61806566201794,-1.33379426415143,1,-0.54882947665181,0.291561239729665,0.433885906081926
GSK3A,-1.49917547397046,-0.763766805832161,11,1.28823716357403,0.0988317094873837,0.31327787158265
GSK3B,-1.83888751362202,-0.936835792039782,49,0.726988688683516,0.233616442499006,0.410878924295873
HIPK2,-2.14247154742174,-1.09149907984209,26,-0.767117622318206,0.221505792655086,0.410878924295873
ICK,-1.88737412528217,-0.961537679948353,2,0.0894353135963304,0.464367979858023,0.485400322125187
IKBKE,-1.15564042261011,-0.588750156064015,1,0.676183088988403,0.24946220403678,0.410878924295873
JAK2,-1.55029134886089,-0.789808192694623,1,0.345600485056788,0.364821490692803,0.439410460521107
LATS1,-3.01367522884958,-1.53534068781017,3,-1.52457726400559,0.0636822859266778,0.307201025123088
LATS2,-2.82260532278578,-1.43799861253028,1,-0.720163810784228,0.235712071396871,0.410878924295873
LIMK1,-0.439261772118948,-0.223785384993614,2,1.80490925711013,0.0355444414865746,0.286652438168229
LIMK2,-0.439261772118948,-0.223785384993614,2,1.80490925711013,0.0355444414865746,0.286652438168229
LMTK2,-1.70437691802127,-0.868308304940171,1,0.216529436965658,0.414287540991696,0.470272343828411
MAK,-2.15516404203502,-1.09796537163857,2,-0.227796027964818,0.409902407374663,0.468459894142472
MAP2K1,-1.72114873658533,-0.876852840596654,12,0.701412627989098,0.241522771739724,0.410878924295873
MAP2K2,-1.9947721909887,-1.01625247419455,9,-0.0801676768997089,0.468051948745574,0.485400322125187
MAP2K4,-2.84341013161542,-1.44859778698428,4,-1.47518226104716,0.0700817746164155,0.307201025123088
MAP2K5,0.142340896448132,0.0725166958151678,2,2.49389186348422,0.006317551543034,0.144345165141807
MAP2K6,-0.667460911928252,-0.340043242150389,4,2.17022136641095,0.0149950401016833,0.229015157916617
MAP2K7,-0.521069978835071,-0.26546322312483,3,2.0918605573969,0.0182254956543508,0.255156939160912
MAP3K10,-0.731347133420216,-0.372590583120673,1,1.03159586276199,0.151130739671382,0.384696428254428
MAP3K7,-3.80948690125885,-1.94077324032534,1,-1.54683330598379,0.0609517233461902,0.307201025123088
MAP3K8,-2.06312262703172,-1.05107414458617,2,-0.11876122219343,0.45273226570049,0.485400322125187
MAP4K4,-0.51392114165866,-0.261821191467801,1,1.21372453835333,0.112426465389095,0.349771225654963
MAP4K5,-0.729624373567118,-0.371712909484023,1,1.03303894676434,0.150792836414871,0.384696428254428
MAPK1,-1.95062183965454,-0.993759728415058,61,0.0801358720964383,0.468064596335001,0.485400322125187
MAPK10,-0.831573504291362,-0.423651700694634,1,0.947640416413576,0.171656271724527,0.388521495321889
MAPK11,-1.48868668693302,-0.758423210294659,13,1.43213988750446,0.0760518955410573,0.307201025123088
MAPK12,-1.72882579299558,-0.880763977721329,12,0.679135857803447,0.248525892106402,0.410878924295873
MAPK13,-1.59651422549065,-0.813356802882584,12,1.06306873841588,0.143875390049208,0.383667706797889
MAPK14,-2.15687635488346,-1.09883772296605,4,-0.325020898168009,0.372582627592347,0.439410460521107
MAPK15,-0.831573504291362,-0.423651700694634,1,0.947640416413576,0.171656271724527,0.388521495321889
MAPK3,-1.93538534706139,-0.98599737672107,51,0.16441939727771,0.434700497275504,0.485400322125187
MAPK6,-1.03946287912232,-0.529562587403961,2,1.09389442619364,0.137000641807865,0.383601797062022
MAPK7,-1.7769560187464,-0.905284302008875,10,0.492470843040547,0.311193264470963,0.439410460521107
MAPK8,-2.04188185179732,-1.04025286359816,13,-0.2386310854429,0.405695829336838,0.466828077593074
MAPK9,-2.56748789656697,-1.30802702140012,5,-1.13248478868156,0.128715337973202,0.372830634129273
MAPKAPK2,-1.90567633778884,-0.970861886906502,4,0.0958186348730718,0.461832308484519,0.485400322125187
MAPKAPK3,-1.64518496958913,-0.838152498518614,2,0.376339285574385,0.35333233835304,0.439410460521107
MAPKAPK5,-1.64518496958913,-0.838152498518614,2,0.376339285574385,0.35333233835304,0.439410460521107
MARK1,-2.71171656690985,-1.38150545856095,8,-1.77420708263534,0.0380144515541423,0.286652438168229
MARK2,-3.27036085237429,-1.66611120946451,3,-1.89699387394397,0.0289143733108931,0.281495860323775
MARK4,-2.09756740008896,-1.06862230672751,1,-0.112829813848481,0.455082740615658,0.485400322125187
MKNK1,-2.09504714505097,-1.06733834285959,1,-0.110718701425802,0.455919707783028,0.485400322125187
MTOR,-2.30120854601074,-1.17236889960949,17,-1.16853554839875,0.121295404397528,0.363886213192584
NEK2,-2.67401013241258,-1.3622956171946,5,-1.33200741160276,0.0914288765247284,0.307201025123088
NLK,-3.27282456061267,-1.667366365118,4,-2.19458733860429,0.0140966063033768,0.229015157916617
NUAK1,-1.60973102852464,-0.820090207752031,2,0.418339004697108,0.337849637824182,0.439410460521107
NUAK2,-1.57457577151993,-0.802180083942714,1,0.325258438089191,0.37249274185656,0.439410460521107
OXSR1,-0.109058163634597,-0.0555605442693887,1,1.55286135169417,0.0602281308662457,0.307201025123088
PAK1,-1.96568795967337,-1.00143528245317,23,-0.0113177436393381,0.49548496993309,0.498451945800953
PAK2,-1.72153483293886,-0.877049540438536,23,0.969510759771222,0.166145207189215,0.388521495321889
PAK3,-3.08411753102124,-1.57122807595068,4,-1.87844333856262,0.0301602707489759,0.281495860323775
PAK4,-2.17737031738326,-1.10927853429807,13,-0.647836027654723,0.25854550527735,0.417650431601873
PAK5,-3.10402734008193,-1.58137128569166,2,-1.35184573322452,0.0882123352715403,0.307201025123088
PAK6,-3.10402734008193,-1.58137128569166,2,-1.35184573322452,0.0882123352715403,0.307201025123088
PBK,-0.831573504291362,-0.423651700694634,1,0.947640416413576,0.171656271724527,0.388521495321889
PDK1,-1.38069416922243,-0.703405567772036,11,1.61740170110784,0.0528957993935703,0.307201025123088
PIM1,-2.17448267426106,-1.10780740166409,5,-0.396362117637962,0.34591895410354,0.439410460521107
PIM2,-2.60500144692995,-1.32713859641826,3,-0.931646104311869,0.175759724074188,0.388521495321889
PIM3,-2.60500144692995,-1.32713859641826,3,-0.931646104311869,0.175759724074188,0.388521495321889
PKD1,-1.89012500664181,-0.962939138220419,10,0.192696609236936,0.42359828956212,0.477614178835142
PKD2,-2.91222065599416,-1.48365385301849,1,-0.79523083390177,0.213239619425936,0.410878924295873
PKD3,-2.08449445748296,-1.06196219269124,1,-0.10187915563314,0.459426297628305,0.485400322125187
PKM,-1.55029134886089,-0.789808192694623,1,0.345600485056788,0.364821490692803,0.439410460521107
PLK1,-2.28196913419935,-1.16256722905097,33,-1.53549544384012,0.0623310876921687,0.307201025123088
PLK2,-3.60665302419057,-1.83743791694741,1,-1.37692783563866,0.0842672800927841,0.307201025123088
PLK3,-0.831573504291362,-0.423651700694634,1,0.947640416413576,0.171656271724527,0.388521495321889
PNCK,-3.58761829069319,-1.82774052137526,1,-1.36098323410311,0.0867594939312498,0.307201025123088
PRKAA1,-2.14968840163365,-1.09517576331596,16,-0.625957602997513,0.265671375189785,0.425074200303655
PRKAA2,-1.72847055652737,-0.880582999692176,17,0.809560252800673,0.209096480043963,0.410878924295873
PRKACA,-1.96939010153666,-1.00332136791464,33,-0.0313712999232745,0.487486714612387,0.496350109423521
PRKACB,-2.31015355829872,-1.17692600688742,6,-0.712567253153295,0.238056790736,0.410878924295873
PRKACG,-2.35414100168718,-1.19933575792514,7,-0.867147129323668,0.192930700266494,0.410878924295873
PRKCA,-1.24727457764357,-0.635433901302774,11,1.98806775895892,0.0234020982738994,0.281495860323775
PRKCB,-1.12736980575166,-0.574347466644544,4,1.39972840882018,0.0807973316242085,0.307201025123088
PRKCD,-1.80139258521749,-0.917733704125689,9,0.405790389108947,0.34244831048699,0.439410460521107
PRKCE,-1.78447480411063,-0.909114806697006,21,0.684796199693627,0.246736266900917,0.410878924295873
PRKCG,-1.43773819881398,-0.732467099947151,16,1.75952623867179,0.0392440837968409,0.286652438168229
PRKCH,-1.7761173842998,-0.904857053055258,6,0.383187014470192,0.350790552771396,0.439410460521107
PRKCI,-2.28696004097731,-1.1651098859942,13,-0.978821077314697,0.163834196717217,0.388521495321889
PRKCQ,-2.8485410112182,-1.45121175419049,4,-1.48377810829708,0.068933898330495,0.307201025123088
PRKCT,-1.4069834698754,-0.716798859975587,6,1.140589006598,0.127020497090659,0.372830634129273
PRKCZ,-2.37182433521077,-1.20834467208914,3,-0.593337210072915,0.276477750550098,0.427816207654611
PRKD1,-1.84263953849776,-0.938747290796601,12,0.34887872316315,0.363590179616924,0.439410460521107
PRKD2,-1.44829396043601,-0.737844816216634,2,0.609581820365638,0.271069428680204,0.425604336619385
PRKD3,-1.32042155398863,-0.672699207098759,1,0.538152814975328,0.295235776276103,0.435084301880573
PRKDC,-1.93676056299258,-0.986697991357139,22,0.102585770574506,0.459145868343782,0.485400322125187
PRKG1,-1.73213002206465,-0.882447343361738,7,0.511375629788017,0.304544028100944,0.439410460521107
PRKG2,-1.2757031874257,-0.649917081467163,2,0.814037623358652,0.207811698924054,0.410878924295873
RAF1,-1.8291609377273,-0.931880510999121,44,0.742944340262848,0.22875768960938,0.410878924295873
RET,-1.55029134886089,-0.789808192694623,1,0.345600485056788,0.364821490692803,0.439410460521107
ROCK1,-1.19139616950218,-0.606966204197177,4,1.29246398529532,0.0980982551938077,0.31327787158265
ROCK2,-1.33359038185118,-0.679408170637559,6,1.29117953460364,0.0983207149494372,0.31327787158265
RPS6KA1,-1.60619687196746,-0.818289703733752,7,0.790473136460575,0.214625752350981,0.410878924295873
RPS6KA2,-1.74634742890108,-0.889690513754536,10,0.573550180581082,0.283136116359913,0.432426068622413
RPS6KA3,-1.72029448202927,-0.876417633854696,9,0.609587874501187,0.271067422953935,0.425604336619385
RPS6KB1,-1.07256073574471,-0.546424552311525,17,3.07491105243248,0.00105282670403956,0.110339355556502
RPS6KB2,-1.48083008784986,-0.754420603734831,7,1.06831544279354,0.142689122400742,0.383667706797889
SGK1,-1.88737412528217,-0.961537679948353,2,0.0894353135963304,0.464367979858023,0.485400322125187
SGK3,-0.729624373567118,-0.371712909484023,1,1.03303894676434,0.150792836414871,0.384696428254428
SRC,-1.94732605207203,-0.992080663356763,1,0.0130210906900589,0.49480548317456,0.498451945800953
STK10,-0.149235165172795,-0.0760290355604541,1,1.51920675492725,0.0643552307820134,0.307201025123088
STK3,-3.25307434356934,-1.65730446079286,2,-1.52841093569858,0.0632052706807683,0.307201025123088
STK38,-3.20606535523392,-1.63335535977719,2,-1.47272278800466,0.0704128996786897,0.307201025123088
STK38L,-2.82260532278578,-1.43799861253028,1,-0.720163810784228,0.235712071396871,0.410878924295873
TESK1,-0.364218834036375,-0.185554166490691,1,1.33912391125863,0.0902651687259775,0.307201025123088
TGFBR2,-2.39121488506349,-1.21822334111854,1,-0.358806051996631,0.359870092452899,0.439410460521107
TLK1,-0.936771593475161,-0.477245699496365,1,0.859520369207828,0.195026743512767,0.410878924295873
TRPM7,-2.06592520998458,-1.05250194264394,1,-0.0863244722845303,0.465604242508402,0.485400322125187
TTK,-2.19210336921836,-1.11678440411494,14,-0.718467993572877,0.236234387914442,0.410878924295873
UHMK1,-2.4744072318877,-1.26060634037834,4,-0.856985615169831,0.195726417281586,0.410878924295873
VRK1,-0.831573504291362,-0.423651700694634,1,0.947640416413576,0.171656271724527,0.388521495321889
WNK1,-2.52372355705085,-1.28573093239523,1,-0.46980303417846,0.319247873218665,0.439410460521107
WNK2,-2.52372355705085,-1.28573093239523,1,-0.46980303417846,0.319247873218665,0.439410460521107

## Sheet: KSEA Kinase Scores GFP all
Kinase.Gene,mS,Enrichment,m,z.score,p.value,FDR
ADRBK1,-1.95428689304889,-0.929585562128017,5,0.262872295280952,0.39632450534583,0.468078231496788
AKT1,-2.02184055961233,-0.961718466119514,48,0.442800444411261,0.328955040929338,0.456897436190174
AKT2,-2.22614410861873,-1.0588984810515,17,-0.405440056694581,0.342577035965996,0.456897436190174
AKT3,-2.45666012871223,-1.16854684684687,7,-0.744505226109524,0.228285440351758,0.431429397191564
ALK,-0.569332893234483,-0.270811639518122,1,1.21741269486138,0.111723617687584,0.427263188222957
ARAF,-2.70436054795324,-1.28636922711176,11,-1.58569913182241,0.0564037881075091,0.404632949813047
ATM,-1.5354453933137,-0.730357387207161,14,1.684420983716,0.0460501691502771,0.404632949813047
ATR,-1.56393761369612,-0.74391013465416,7,1.13120029635964,0.128985398620832,0.427263188222957
AURKA,-2.2462015394799,-1.06843909569116,70,-0.955985666762364,0.169539737994989,0.431429397191564
AURKB,-2.03562601181205,-0.968275721033235,29,0.285225833275433,0.387735564961703,0.468078231496788
AURKC,-2.12475134236268,-1.01066950712188,4,-0.0356264420060283,0.485790112014779,0.488630989862818
BRAF,-2.90831862828695,-1.38338491474285,4,-1.28015664407439,0.100245025257911,0.427263188222957
BUB1,-1.99548908115532,-0.949183994337764,1,0.0848396021495347,0.466194454528995,0.48842197022575
CAMK1,-1.61369930749168,-0.767580022767271,3,0.672097345485216,0.250760863163229,0.431429397191564
CAMK1G,-1.36719225043879,-0.650325282936552,1,0.583797634048605,0.279678235118389,0.437315058548754
CAMK2A,-1.5442712728674,-0.734555547792171,6,1.08554386349419,0.138840423704139,0.431429397191564
CAMK2B,-2.02481006154615,-0.963130953781489,8,0.174102494944451,0.430892456232336,0.48758883205238
CAMK2D,-1.86158299403879,-0.88548957684598,8,0.540739520358139,0.294343567216203,0.456099941992675
CAMK2G,-1.6385355701567,-0.77939375967189,3,0.637935130565522,0.261757954052532,0.431429397191564
CAMK4,-1.89081051850311,-0.89939208259138,3,0.290931593016297,0.385551819081486,0.468078231496788
CDC42BPA,0.647070942721585,0.307788896382627,1,2.18341225798341,0.0145027320254443,0.302710863766242
CDC7,-3.60972138012488,-1.71701754241103,4,-2.39418593569609,0.00832865107455907,0.23875466413736
CDK1,-2.38277849333042,-1.1334039505804,222,-3.31851111418163,0.000452493604874097,0.0537704182410393
CDK16,-3.36381963483289,-1.60005072810216,1,-1.0018116217182,0.158217291582255,0.431429397191564
CDK19,-1.97290055390879,-0.938439426141153,1,0.102778140985664,0.459069527170872,0.48842197022575
CDK2,-2.34540259852155,-1.1156255515595,188,-2.64685920575704,0.00406215851980358,0.174672816351554
CDK3,-2.09231822893132,-0.995242215413639,5,0.0177618368116885,0.492914424883087,0.492914424883087
CDK4,-2.17446766126412,-1.03431781199324,22,-0.268737968312416,0.394065665859341,0.468078231496788
CDK5,-2.2982542597095,-1.09319874452626,49,-1.08919640817498,0.13803364126603,0.431429397191564
CDK6,-2.23507611698033,-1.06314712337892,11,-0.349661657884646,0.36329631595226,0.468078231496788
CDK7,-2.44131925376349,-1.16124973202024,10,-0.851328357790536,0.197293488232022,0.431429397191564
CDK9,-1.34601337583711,-0.640251236939583,4,1.20123341195684,0.114830336042621,0.427263188222957
CHEK1,-2.21638663459736,-1.05425719373316,17,-0.373490781265246,0.354391602628945,0.465308058413577
CHEK2,-2.04536072758579,-0.97290618305336,3,0.0783481810200205,0.468775546154417,0.48842197022575
CHUK,-2.28365771888662,-1.08625568327244,8,-0.407315382444877,0.341888183186279,0.456897436190174
CLK1,-2.9180144202839,-1.38799686209092,11,-2.14843715427312,0.0158395219412569,0.302710863766242
CLK4,-5.24373943560209,-2.4942624791861,1,-2.49473827368011,0.0063025032901172,0.216806113180032
CSNK1A1,-2.38678415991852,-1.13530930533678,14,-0.845258955328435,0.198983136077201,0.431429397191564
CSNK1D,-2.57820383009791,-1.22636091210904,4,-0.755839404347677,0.224872744133485,0.431429397191564
CSNK1E,-2.57057152514891,-1.2227304929973,4,-0.743717109056568,0.228523818283705,0.431429397191564
CSNK1G1,-2.39075034533141,-1.13719588028627,4,-0.458109359378172,0.323436937552491,0.456897436190174
CSNK1G2,-3.52952744839307,-1.67887210871176,1,-1.13340745426441,0.128521592583436,0.427263188222957
CSNK2A1,-2.2753502149945,-1.08230409576351,58,-1.04648629021712,0.147668285704437,0.431429397191564
CSNK2A2,-1.91352691278731,-0.910197472641996,8,0.424064240031681,0.335759482052586,0.456897436190174
DMPK,-1.76216436433055,-0.838199630261347,10,0.854235485130742,0.196487262657698,0.431429397191564
DYRK1A,-2.05628315814382,-0.978101599236218,3,0.0633244060985846,0.47475409075267,0.48842197022575
DYRK1B,-2.87137083462509,-1.36581014838551,1,-0.610736460822467,0.270687031951993,0.435123079399465
DYRK2,-2.24990682264557,-1.07020156861499,5,-0.262077608397546,0.396630804750998,0.468078231496788
EGFR,-0.569332893234483,-0.270811639518122,1,1.21741269486138,0.111723617687584,0.427263188222957
EIF2AK2,-2.29311241502094,-1.09075294979561,7,-0.400873980567983,0.344256453737734,0.456897436190174
ERBB2,-0.569332893234483,-0.270811639518122,1,1.21741269486138,0.111723617687584,0.427263188222957
FER,-0.569332893234483,-0.270811639518122,1,1.21741269486138,0.111723617687584,0.427263188222957
GRK1,-2.63832360774259,-1.25495777651805,1,-0.425663450773666,0.335176549064691,0.456897436190174
GRK7,-2.63832360774259,-1.25495777651805,1,-0.425663450773666,0.335176549064691,0.456897436190174
GSK3A,-2.2563800324684,-1.0732806469291,15,-0.473841421666164,0.317806497083374,0.456897436190174
GSK3B,-2.38145458372535,-1.13277421333004,56,-1.6588451559126,0.0485734992281609,0.404632949813047
HIPK2,-2.27893808403721,-1.08401071891735,27,-0.728810602026469,0.233058762694792,0.431429397191564
ICK,-1.61144814735081,-0.766509225039241,3,0.67519381042394,0.249776319287419,0.431429397191564
IKBKB,-1.95914374551628,-0.931895796079405,1,0.113703025061411,0.454736607212043,0.48842197022575
IRAK1,-2.45992868456601,-1.1701015839438,1,-0.283992228801303,0.388208168044571,0.468078231496788
JAK2,-0.569332893234483,-0.270811639518122,1,1.21741269486138,0.111723617687584,0.427263188222957
LATS1,-2.27710852539461,-1.0831404621985,4,-0.27761346621115,0.390654546899203,0.468078231496788
LATS2,-2.88973322998908,-1.37454449423676,1,-0.625318843231309,0.265880907571545,0.431429397191564
LIMK1,-1.08119683494556,-0.514287319409843,2,1.146812817122,0.12572949540224,0.427263188222957
LIMK2,-1.08119683494556,-0.514287319409843,2,1.146812817122,0.12572949540224,0.427263188222957
LMTK2,-3.15077327461593,-1.49871206527532,1,-0.832622175901828,0.202528924090156,0.431429397191564
MAK,-2.39164215549882,-1.13762008302678,3,-0.397961025506589,0.345329457585597,0.456897436190174
MAP2K1,-2.16757886813976,-1.03104105531454,12,-0.179525109040642,0.4287627017121,0.48758883205238
MAP2K2,-2.39954656327839,-1.14137993188787,9,-0.708120424872869,0.239435238379359,0.431429397191564
MAP2K4,-2.02934326297888,-0.965287238315289,5,0.129590231994617,0.448445315907308,0.48842197022575
MAP2K5,-0.859371054719214,-0.408772595169691,3,1.70967390194119,0.0436630956754242,0.404632949813047
MAP2K6,-1.92685497280244,-0.916537162175457,3,0.241352539555446,0.404640946739491,0.47345743428022
MAP2K7,-1.85537598857244,-0.882537122584481,3,0.33967169708899,0.36705188910766,0.468078231496788
MAP3K10,-1.50208833488401,-0.714490607349204,1,0.476670745108361,0.316798299008796,0.456897436190174
MAP3K11,-2.84964978155663,-1.35547820715494,1,-0.593486821225446,0.276427700066511,0.437315058548754
MAP3K7,-3.77582670752653,-1.7960280063784,1,-1.32900448354639,0.0919232453400666,0.427263188222957
MAP3K8,-1.9918914631371,-0.947472733939057,2,0.124021760959327,0.450649022663071,0.48842197022575
MAP4K4,-1.17921675735841,-0.560911950112729,1,0.733077206198733,0.231755670758449,0.431429397191564
MAP4K5,-1.50898810490925,-0.717772585353702,1,0.471191335529893,0.318752052784506,0.456897436190174
MAPK1,-2.22523853973973,-1.05846773377564,65,-0.786993304567964,0.215642892806738,0.431429397191564
MAPK10,-3.32024254549178,-1.57932263887681,3,-1.67524845499281,0.0469427470558265,0.404632949813047
MAPK11,-1.85482836059316,-0.882276635209385,13,0.708651060344668,0.239270520930889,0.431429397191564
MAPK12,-2.25980904792633,-1.07491170901796,13,-0.450940746743228,0.326016127552311,0.456897436190174
MAPK13,-2.37902346852097,-1.13161781730554,12,-0.761208108552849,0.223266387925631,0.431429397191564
MAPK14,-1.94046820107518,-0.923012496222524,6,0.314842942077923,0.376440452732598,0.468078231496788
MAPK15,-3.00975519430933,-1.43163472268131,1,-0.72063354191218,0.235567505592313,0.431429397191564
MAPK3,-2.31817723993047,-1.10267540572367,55,-1.27129362983919,0.10181210385828,0.427263188222957
MAPK6,-3.23242866948741,-1.53755266560497,1,-0.89746830137496,0.184734540333231,0.431429397191564
MAPK7,-2.13156766150605,-1.01391179047601,12,-0.0804584662746997,0.467936314104296,0.48842197022575
MAPK8,-2.55065252413929,-1.21325572457081,15,-1.37893700374734,0.0839570889241466,0.427263188222957
MAPK9,-2.16088912196316,-1.02785897827039,6,-0.113930212717194,0.454646557605099,0.48842197022575
MAPKAPK2,-2.74887856008788,-1.30754488022707,5,-1.14813142035127,0.125457157480705,0.427263188222957
MAPKAPK3,-2.72876002734724,-1.29797520157169,2,-0.703547166880058,0.24085741170903,0.431429397191564
MAPKAPK5,-2.72876002734724,-1.29797520157169,2,-0.703547166880058,0.24085741170903,0.431429397191564
MARK1,-2.07773782008774,-0.988306827575179,8,0.0552173354556372,0.477982659154129,0.48842197022575
MARK2,-2.73962643388431,-1.30314396909759,3,-0.876612498444258,0.190348574115841,0.431429397191564
MARK3,-1.55072720064922,-0.737626405647008,1,0.438044491481815,0.330677015801571,0.456897436190174
MARK4,-0.99229685687912,-0.472000725574515,1,0.881518486030684,0.189018626460426,0.431429397191564
MOK,-1.23294063864234,-0.586466511503204,1,0.690412719031357,0.244967340225296,0.431429397191564
MTOR,-2.5863847725914,-1.23025229881055,18,-1.63094128277794,0.0514513548752919,0.404632949813047
NEK2,-2.921689769075,-1.38974509628526,6,-1.59387545710757,0.0554819662446049,0.404632949813047
NEK6,-2.45992868456601,-1.1701015839438,1,-0.283992228801303,0.388208168044571,0.468078231496788
NLK,-1.43002291733509,-0.680211622047464,5,1.19383904007567,0.116270468514432,0.427263188222957
NUAK1,-2.13895978375308,-1.01742796312127,3,-0.0503970781276349,0.479902982372975,0.48842197022575
NUAK2,-0.865061038407692,-0.411479120349984,1,0.982562022250931,0.162911521770723,0.431429397191564
OXSR1,-0.0507353870373354,-0.0241330397530861,2,2.30411266277268,0.0106081600528697,0.26065764701337
PAK1,-2.51254069259657,-1.19512726632121,24,-1.5959588139333,0.0552489945085453,0.404632949813047
PAK2,-1.87174761606803,-0.890324530156304,24,0.897042920086728,0.184848007505655,0.431429397191564
PAK3,-2.01137521531083,-0.956740469797696,4,0.144447454447082,0.4425735732329,0.48842197022575
PAK4,-2.35730739864882,-1.12128824640624,11,-0.671603820586423,0.250917972687561,0.431429397191564
PAK5,-2.96567928960994,-1.41066936452841,2,-0.96962856779504,0.166115833916101,0.431429397191564
PAK6,-2.96567928960994,-1.41066936452841,2,-0.96962856779504,0.166115833916101,0.431429397191564
PBK,-3.00975519430933,-1.43163472268131,1,-0.72063354191218,0.235567505592313,0.431429397191564
PDK1,-1.28474824057391,-0.611109566182309,9,1.94781009968509,0.0257188449308921,0.368636777342787
PIM1,-2.9480605525064,-1.40228875076457,6,-1.6451731468221,0.0499670547722524,0.404632949813047
PIM2,-3.19117170833459,-1.51792817978288,3,-1.49771185303705,0.067104065463461,0.404632949813047
PIM3,-3.19117170833459,-1.51792817978288,3,-1.49771185303705,0.067104065463461,0.404632949813047
PKD1,-2.02868496874479,-0.964974110893813,7,0.154716376939288,0.438522459265319,0.48842197022575
PKD2,-2.3510757728322,-1.11832408110978,1,-0.197547363970068,0.421699610266687,0.483548886439134
PKD3,-2.68110058032111,-1.27530527833162,2,-0.650021369482112,0.257839209101736,0.431429397191564
PKM,-0.569332893234483,-0.270811639518122,1,1.21741269486138,0.111723617687584,0.427263188222957
PLK1,-2.25996011892168,-1.07498356817878,34,-0.729967727385713,0.232704955812602,0.431429397191564
PLK2,-4.72383803793485,-2.24696366409367,1,-2.08186180275189,0.0186775473203415,0.321253813909874
PLK3,-3.00975519430933,-1.43163472268131,1,-0.72063354191218,0.235567505592313,0.431429397191564
PLK4,-2.70504438535736,-1.28669450452112,1,-0.478649342565411,0.316094054718085,0.456897436190174
PNCK,-1.36719225043879,-0.650325282936552,1,0.583797634048605,0.279678235118389,0.437315058548754
PRKAA1,-1.66599691599987,-0.792456156346199,17,1.42867160978288,0.0765493206965695,0.424725263219676
PRKAA2,-1.82110956527613,-0.86623778983282,15,0.864922438418812,0.193540680503073,0.431429397191564
PRKACA,-2.05072858622955,-0.975459484675823,28,0.216800756016161,0.414181811378283,0.481346429439626
PRKACB,-2.07283898967617,-0.985976626191693,6,0.0573490508333336,0.477133573851614,0.48842197022575
PRKACG,-2.1536225065428,-1.02440250480974,7,-0.10779075788658,0.457080837155852,0.48842197022575
PRKCA,-0.989262794202846,-0.470557528637316,10,2.79522566668942,0.00259317491652045,0.148675361880506
PRKCB,-2.05123055371197,-0.975698252957994,3,0.0702742503981511,0.471987688515828,0.48842197022575
PRKCD,-1.98748966197502,-0.945378951893966,11,0.302450613966164,0.381154287918935,0.468078231496788
PRKCE,-1.59496127443176,-0.758666999271523,21,1.84639433392665,0.0324174846677117,0.404632949813047
PRKCG,-1.58289002113084,-0.75292512850258,13,1.48729922885391,0.0684678990545966,0.404632949813047
PRKCH,-1.93153774293233,-0.918764591279647,5,0.303269315125816,0.380842314341909,0.468078231496788
PRKCI,-2.59754551569639,-1.2355610718929,14,-1.47151820082636,0.0705755145022756,0.404632949813047
PRKCQ,-3.0339284195868,-1.44313307601312,4,-1.47966111772501,0.0694818535333928,0.404632949813047
PRKCT,-1.58113715383994,-0.752091351163261,5,0.92549649630368,0.177353852684513,0.431429397191564
PRKCZ,-1.63112614271036,-0.775869355551768,3,0.648126778812603,0.258451477589634,0.431429397191564
PRKD1,-2.58040714615883,-1.22740895209044,11,-1.25922111651234,0.103975238187373,0.427263188222957
PRKD2,-1.85719449440927,-0.883402121872242,2,0.275298435535329,0.391543483156616,0.468078231496788
PRKD3,-1.84144244350168,-0.875909425098966,1,0.207174784163221,0.417936679706845,0.482450395366291
PRKDC,-2.28914742920087,-1.08886694545025,26,-0.756528032753342,0.22466633581168,0.431429397191564
PRKG1,-1.86635364632491,-0.887758808401943,6,0.459014063986354,0.323112033307288,0.456897436190174
PRKG2,-0.900294098477513,-0.428238248227774,1,0.954581906084864,0.169894585458097,0.431429397191564
RAF1,-1.97972528458148,-0.941685710564035,45,0.653099488186465,0.256846071106432,0.431429397191564
RET,-0.569332893234483,-0.270811639518122,1,1.21741269486138,0.111723617687584,0.427263188222957
ROCK1,-1.06459457754094,-0.506390209299261,6,2.01863355891993,0.0217626601633724,0.340288868009096
ROCK2,-1.35060233372975,-0.642434042860957,8,1.6884929671398,0.045658318934827,0.404632949813047
RPS6KA1,-1.68676206976774,-0.802333409888983,8,0.933418410162496,0.175301989280854,0.431429397191564
RPS6KA2,-1.65223118018339,-0.785908279822758,10,1.13031104158467,0.129172591788336,0.427263188222957
RPS6KA3,-1.92655849063253,-0.91639613603157,9,0.418741209475847,0.337702637482759,0.456897436190174
RPS6KB1,-1.1167446009935,-0.531196141856332,17,3.22710975616197,0.000625237421407433,0.0537704182410393
RPS6KB2,-1.44508629903785,-0.687376743093669,8,1.47626517600895,0.0699363594307041,0.404632949813047
SGK1,-2.0200503255143,-0.960866914703867,2,0.0923968543226122,0.463191369312922,0.48842197022575
SGK3,-1.50898810490925,-0.717772585353702,1,0.471191335529893,0.318752052784506,0.456897436190174
SRC,-2.04911645400009,-0.974692650056979,1,0.0422517565606409,0.483149001800207,0.488630989862818
STK3,-2.68460315479697,-1.27697132985897,2,-0.653955072104876,0.256570375694128,0.431429397191564
STK38,-1.91309135856734,-0.909990294813679,3,0.260284355260294,0.397322219758902,0.468078231496788
STK38L,-2.88973322998908,-1.37454449423676,1,-0.625318843231309,0.265880907571545,0.431429397191564
STK39,-1.48443099520785,-0.706091631698836,1,0.490693211914924,0.31182172413682,0.456897436190174
TESK1,-0.856588200613929,-0.407448889317197,1,0.989290673842814,0.161260472845902,0.431429397191564
TGFBR2,-0.947370035248033,-0.450630616155522,1,0.917196842827365,0.17951975046429,0.431429397191564
TRPM7,-1.24349475521508,-0.591486733673206,1,0.682031232803647,0.247609600910523,0.431429397191564
TTK,-2.46049757634478,-1.17037218576069,16,-1.13777604271835,0.127607005567123,0.427263188222957
UHMK1,-3.0290049096833,-1.44079113546306,4,-1.47184116800894,0.0705318868296958,0.404632949813047
ULK1,-3.04003186572457,-1.44603627074316,1,-0.744677572763929,0.228233330127559,0.431429397191564
VRK1,-3.00975519430933,-1.43163472268131,1,-0.72063354191218,0.235567505592313,0.431429397191564
WNK1,-0.941784915752499,-0.447973971184779,1,0.921632230840121,0.178360220296326,0.431429397191564
WNK2,-0.941784915752499,-0.447973971184779,1,0.921632230840121,0.178360220296326,0.431429397191564
