# Supplementary material for: Diverse BRAF Gene Fusions Confer Resistance to EGFR-Targeted Therapy via Differential Modulation of BRAF Activity
Source: Oxford University Press journal article supplement (doi:10.1158/1541-7786.mcr-19-0529), 2020-01-07
Supplement: 15417786mcr190529-sup-222529_2_supp_5922407_q1j8xn.xlsx [file 15417786mcr190529-sup-222529_2_supp_5922407_q1j8xn.xlsx]

## Sheet: Differential expressed genes 
Fusions vs Rest						AGAP3-BRAF vs. Controls						DLG1-BRAF vs. Controls						TRIM24-BRAF vs. Controls						BRAF-WT vs. Controls						BRAF-Kinase vs. Controls						BRAF-V600E vs. Controls
EnsembleGeneID	Gene Symbol	log2FoldChange	pvalue	padj		EnsembleGeneID	Gene Symbol	log2FoldChange	pvalue	padj		EnsembleGeneID	Gene Symbol	log2FoldChange	pvalue	padj		EnsembleGeneID	Gene Symbol	log2FoldChange	pvalue	padj		EnsembleGeneID	Gene Symbol	log2FoldChange	pvalue	padj		EnsembleGeneID	Gene Symbol	log2FoldChange	pvalue	padj		EnsembleGeneID	Gene Symbol	log2FoldChange	pvalue	padj
ENSG00000125848	FLRT3	-4.88665	6.73e-24	1.12e-19		ENSG00000157764	BRAF	-4.48986	2.26253e-71	3.38972e-67		ENSG00000058085	LAMC2	-5.35289	4.31287e-106	6.57239e-102		ENSG00000058085	LAMC2	-4.00936	1.27467e-60	1.98326e-56		ENSG00000157764	BRAF	-2.33638	4.93e-20	7.97e-16		ENSG00000157764	BRAF	-2.58615	3.1532e-24	5.09778e-20		ENSG00000058085	LAMC2	-1.29202	1.38178e-07	0.00223172
ENSG00000164023	SGMS2	-3.78463	2.3e-21	1.91e-17		ENSG00000063660	GPC1	-3.90862	7.0281e-22	5.26475e-18		ENSG00000069535	MAOB	-6.54588	3.38402e-87	2.57846e-83		ENSG00000069535	MAOB	-5.70147	2.84577e-59	2.21386e-55								ENSG00000058085	LAMC2	-1.88935	1.08503e-14	8.77082e-11		ENSG00000138166	DUSP5	-3.19196	2.97795e-06	0.0240484
ENSG00000057019	DCBLD2	-2.44832	4.64e-21	2.57e-17		ENSG00000133612	AGAP3	-2.03786	1.42536e-17	7.11826e-14		ENSG00000101457	DNTTIP1	-3.4671	2.15953e-77	1.09697e-73		ENSG00000057019	DCBLD2	-2.68056	2.47266e-58	1.2824e-54								ENSG00000063660	GPC1	-2.69632	1.30317e-10	7.02278e-07
ENSG00000147065	MSN	-3.55471	3.67e-20	1.52e-16		ENSG00000058085	LAMC2	-2.04554	6.01704e-17	2.25368e-13		ENSG00000057019	DCBLD2	-3.11576	2.01194e-76	7.66498e-73		ENSG00000053747	LAMA3	-4.57129	4.74715e-38	1.84652e-34								ENSG00000228705	LINC00659	-3.41297	5.89506e-09	2.38264e-05
ENSG00000144366	GULP1	-3.42498	3.07e-19	1.02e-15		ENSG00000069535	MAOB	-3.4637	2.74254e-15	8.21776e-12		ENSG00000137877	SPTBN5	-4.74332	3.60042e-69	1.09734e-65		ENSG00000164171	ITGA2	-3.84139	2.12558e-37	6.61438e-34								ENSG00000069535	MAOB	-2.51942	1.36899e-07	0.000442649
ENSG00000253368	TRNP1	-2.33567	4.69e-18	1.3e-14		ENSG00000228705	LINC00659	-4.14061	5.58168e-13	1.39374e-09		ENSG00000182718	ANXA2	-3.35705	1.84251e-68	4.67968e-65		ENSG00000172183	ISG20	-4.78369	3.59572e-33	9.3243e-30								ENSG00000172183	ISG20	-2.1282	1.27118e-06	0.00342519
ENSG00000053747	LAMA3	-4.17661	8.05e-18	1.67e-14		ENSG00000185567	AHNAK2	-4.80754	2.80414e-12	6.00166e-09		ENSG00000164171	ITGA2	-5.11322	2.64791e-65	5.76449e-62		ENSG00000182718	ANXA2	-2.1978	1.04622e-30	2.32545e-27
ENSG00000164171	ITGA2	-3.98327	7.77e-18	1.67e-14		ENSG00000053747	LAMA3	-2.41844	1.92658e-11	3.60801e-08		ENSG00000172183	ISG20	-6.02634	3.58575e-55	6.8304e-52		ENSG00000125775	SDCBP2	-3.61494	1.81524e-29	3.53041e-26
ENSG00000188277	C15orf62	-3.81787	1.57e-17	2.9e-14		ENSG00000057019	DCBLD2	-0.99625	5.79163e-09	8.67702e-06		ENSG00000063660	GPC1	-5.81054	1.06078e-49	1.79614e-46		ENSG00000101457	DNTTIP1	-2.02725	3.65949e-27	6.32644e-24
ENSG00000235750	KIAA0040	-2.99635	2.92e-17	4.86e-14		ENSG00000106123	EPHB6	-4.65726	5.23342e-09	8.67702e-06		ENSG00000085063	CD59	-2.74942	4.72387e-49	7.19871e-46		ENSG00000125848	FLRT3	-5.33433	1.64182e-25	2.5545e-22
ENSG00000075618	FSCN1	-5.08145	5.1e-17	6.71e-14		ENSG00000075618	FSCN1	-3.53058	7.0793e-09	9.642e-06		ENSG00000053747	LAMA3	-5.18271	6.12917e-49	8.49113e-46		ENSG00000075618	FSCN1	-5.60877	7.12821e-24	1.00825e-20
ENSG00000099617	EFNA2	-3.39026	4.94e-17	6.71e-14		ENSG00000172183	ISG20	-2.48662	9.95467e-09	1.24284e-05		ENSG00000006327	TNFRSF12A	-3.60806	1.16789e-48	1.48313e-45		ENSG00000101213	PTK6	-3.42003	1.33686e-23	1.73336e-20
ENSG00000101213	PTK6	-3.28973	5.25e-17	6.71e-14		ENSG00000164171	ITGA2	-1.70623	1.37376e-08	1.5832e-05		ENSG00000005001	PRSS22	-4.96549	2.19964e-45	2.57849e-42		ENSG00000085063	CD59	-1.82106	7.92419e-23	9.48403e-20
ENSG00000134954	ETS1	-2.63601	6.54e-17	7.76e-14		ENSG00000131016	AKAP12	-4.0633	4.57198e-07	0.000489268		ENSG00000138623	SEMA7A	-5.10063	9.30346e-45	1.01268e-41		ENSG00000188643	S100A16	-3.4889	3.42533e-20	3.80676e-17
ENSG00000197461	PDGFA	-4.42084	7.7e-17	8.53e-14		ENSG00000188613	NANOS1	-2.04868	8.95207e-07	0.000894133		ENSG00000125775	SDCBP2	-4.37009	2.70885e-43	2.75201e-40		ENSG00000139725	RHOF	-1.79613	5.15341e-20	5.34546e-17
ENSG00000169429	IL8	-4.00892	1.44e-16	1.5e-13		ENSG00000125266	EFNB2	-1.02989	1.21237e-06	0.00113523		ENSG00000141524	TMC6	-3.15477	1.11284e-40	1.05991e-37		ENSG00000136059	VILL	-2.85165	1.58705e-19	1.5433e-16
ENSG00000188064	WNT7B	-5.07742	2.5e-16	2.44e-13		ENSG00000184292	TACSTD2	-3.45772	1.99014e-06	0.0017539		ENSG00000225190	PLEKHM1	-2.61487	4.33953e-39	3.89e-36		ENSG00000196878	LAMB3	-2.57738	5.56214e-18	5.09067e-15
ENSG00000006327	TNFRSF12A	-2.54464	3.86e-16	3.38e-13		ENSG00000188910	GJB3	-3.52082	2.43689e-06	0.0020283		ENSG00000139725	RHOF	-2.56498	6.25084e-39	5.29203e-36		ENSG00000101928	MOSPD1	-1.65852	7.1061e-18	6.14244e-15
ENSG00000243927	MRPS6	-2.35171	3.86e-16	3.38e-13		ENSG00000005001	PRSS22	-1.72379	2.58963e-06	0.00204199		ENSG00000160360	GPSM1	-5.92188	6.80365e-39	5.45688e-36		ENSG00000137877	SPTBN5	-2.65086	7.68415e-18	6.29251e-15
ENSG00000162909	CAPN2	-2.78225	5.26e-16	4.37e-13								ENSG00000117868	ESYT2	-3.09516	5.61447e-38	4.27794e-35		ENSG00000162909	CAPN2	-2.88869	9.68731e-18	7.53624e-15
ENSG00000128591	FLNC	-3.93159	1.57e-15	1.19e-12								ENSG00000101213	PTK6	-4.19732	1.84661e-37	1.34002e-34		ENSG00000147065	MSN	-3.81236	1.09987e-17	8.14899e-15
ENSG00000179674	ARL14	-3.40317	1.58e-15	1.19e-12								ENSG00000170421	KRT8	-3.23283	4.08599e-37	2.83029e-34		ENSG00000188277	C15orf62	-4.00389	1.59451e-17	1.12768e-14
ENSG00000133805	AMPD3	-2.10591	2.37e-15	1.71e-12								ENSG00000066322	ELOVL1	-2.12846	9.20486e-37	6.09882e-34		ENSG00000225190	PLEKHM1	-1.70457	2.07887e-17	1.40631e-14
ENSG00000125744	RTN2	-3.88706	2.92e-15	2.02e-12								ENSG00000178209	PLEC	-3.0785	2.86023e-36	1.81613e-33		ENSG00000138623	SEMA7A	-3.52015	3.08722e-17	2.00142e-14
ENSG00000124143	ARHGAP40	-3.61687	3.54e-15	2.35e-12								ENSG00000062716	VMP1	-2.58279	1.54198e-35	9.39928e-33		ENSG00000012061	ERCC1	-2.02489	4.18903e-17	2.60709e-14
ENSG00000173334	TRIB1	-2.34614	3.75e-15	2.4e-12								ENSG00000124171	PARD6B	-2.35264	5.51669e-35	3.11366e-32		ENSG00000141524	TMC6	-1.99319	4.68137e-17	2.80144e-14
ENSG00000011422	PLAUR	-2.64268	5.16e-15	3.17e-12								ENSG00000188643	S100A16	-4.65181	5.41333e-35	3.11366e-32		ENSG00000006327	TNFRSF12A	-2.06255	1.45408e-16	8.37928e-14
ENSG00000137331	IER3	-2.7894	9.65e-15	5.34e-12								ENSG00000164023	SGMS2	-4.92118	8.93095e-34	4.86067e-31		ENSG00000128591	FLNC	-3.74929	1.57027e-16	8.72565e-14
ENSG00000162975	KCNF1	-4.30659	9.48e-15	5.34e-12								ENSG00000197461	PDGFA	-5.94683	9.88158e-34	5.1926e-31		ENSG00000170421	KRT8	-2.08621	1.91433e-16	1.02707e-13
ENSG00000225190	PLEKHM1	-1.86629	9.2e-15	5.34e-12								ENSG00000111057	KRT18	-3.2932	2.0488e-33	1.04072e-30		ENSG00000075945	KIFAP3	-1.49957	7.49717e-16	3.88828e-13
ENSG00000078804	TP53INP2	-3.43334	1.02e-14	5.47e-12								ENSG00000116285	ERRFI1	-2.66153	2.20757e-33	1.0852e-30		ENSG00000185567	AHNAK2	-7.3629	1.23985e-15	6.22286e-13
ENSG00000147883	CDKN2B	-5.27833	1.19e-14	6.17e-12								ENSG00000136059	VILL	-3.75206	5.11441e-33	2.43558e-30		ENSG00000124171	PARD6B	-1.51375	1.92863e-15	9.37735e-13
ENSG00000125775	SDCBP2	-3.44213	1.44e-14	6.88e-12								ENSG00000012061	ERCC1	-2.87882	5.48448e-33	2.53267e-30		ENSG00000123240	OPTN	-1.87194	2.65227e-15	1.25051e-12
ENSG00000166401	SERPINB8	-2.41579	1.45e-14	6.88e-12								ENSG00000003402	CFLAR	-2.29983	6.83725e-33	3.0645e-30		ENSG00000080031	PTPRH	-3.59092	3.04174e-15	1.39195e-12
ENSG00000167895	TMC8	-4.12818	1.42e-14	6.88e-12								ENSG00000157764	BRAF	-3.03046	1.88584e-32	8.21093e-30		ENSG00000235750	KIAA0040	-2.95398	3.20803e-15	1.42611e-12
ENSG00000005108	THSD7A	-4.19416	1.97e-14	9.07e-12								ENSG00000123240	OPTN	-2.8002	2.52491e-32	1.06881e-29		ENSG00000197461	PDGFA	-4.64846	3.56912e-15	1.54255e-12
ENSG00000075945	KIFAP3	-1.34999	2.12e-14	9.54e-12								ENSG00000125266	EFNB2	-2.47494	7.4723e-32	3.07758e-29		ENSG00000117595	IRF6	-1.33551	5.34572e-15	2.24795e-12
ENSG00000188643	S100A16	-3.5349	2.2e-14	9.61e-12								ENSG00000163947	ARHGEF3	-2.30884	1.3416e-31	5.38015e-29		ENSG00000063660	GPC1	-3.2394	6.90761e-15	2.8283e-12
ENSG00000136167	LCP1	-2.62232	2.46e-14	1.05e-11								ENSG00000075618	FSCN1	-6.20279	3.85793e-30	1.50746e-27		ENSG00000111057	KRT18	-2.1127	1.011e-14	4.02475e-12
ENSG00000185761	ADAMTSL5	-2.06712	4.5e-14	1.87e-11								ENSG00000171346	KRT15	-3.6215	5.82822e-30	2.22041e-27		ENSG00000133805	AMPD3	-2.16044	1.03471e-14	4.02475e-12
ENSG00000101188	NTSR1	-4.54706	4.64e-14	1.88e-11								ENSG00000128591	FLNC	-5.00453	6.97846e-30	2.59377e-27		ENSG00000005381	MPO	-5.37777	1.2097e-14	4.59067e-12
ENSG00000178607	ERN1	-1.28723	6.05e-14	2.4e-11								ENSG00000013563	DNASE1L1	-1.86618	2.22674e-29	8.07935e-27		ENSG00000171346	KRT15	-2.523	1.38258e-14	5.12181e-12
ENSG00000182718	ANXA2	-2.33404	7.21e-14	2.78e-11								ENSG00000162909	CAPN2	-3.72435	1.36989e-28	4.85484e-26		ENSG00000011422	PLAUR	-2.56694	2.10262e-14	7.60808e-12
ENSG00000100097	LGALS1	-4.11714	1.11e-13	4.15e-11								ENSG00000005381	MPO	-6.77295	1.69333e-28	5.8647e-26		ENSG00000178209	PLEC	-1.84744	4.46943e-14	1.58045e-11
ENSG00000181191	PJA1	-2.32742	1.12e-13	4.15e-11								ENSG00000113070	HBEGF	-3.62864	3.9077e-28	1.32332e-25		ENSG00000099617	EFNA2	-3.4584	6.92144e-14	2.39313e-11
ENSG00000085063	CD59	-1.88927	1.43e-13	5.16e-11								ENSG00000125848	FLRT3	-5.52641	4.29505e-28	1.42287e-25		ENSG00000114115	RBP1	-3.82762	7.79768e-14	2.63748e-11
ENSG00000012061	ERCC1	-2.0435	1.52e-13	5.36e-11								ENSG00000088826	SMOX	-1.93508	4.40986e-28	1.42983e-25		ENSG00000135549	PKIB	-2.45318	9.95917e-14	3.29691e-11
ENSG00000178209	PLEC	-2.12132	1.8e-13	6.22e-11								ENSG00000188277	C15orf62	-4.82856	2.50326e-27	7.94734e-25		ENSG00000189334	S100A14	-2.78272	1.05774e-13	3.42862e-11
ENSG00000131016	AKAP12	-5.86108	1.93e-13	6.53e-11								ENSG00000185033	SEMA4B	-2.78485	4.02513e-27	1.25181e-24		ENSG00000144366	GULP1	-3.8644	1.17553e-13	3.73266e-11
ENSG00000188613	NANOS1	-2.69742	2.13e-13	7.08e-11								ENSG00000167895	TMC8	-5.67181	4.51654e-27	1.37655e-24		ENSG00000182378	PLCXD1	-1.78623	3.82974e-13	1.19174e-10
ENSG00000188910	GJB3	-5.15766	2.31e-13	7.47e-11								ENSG00000143384	MCL1	-2.06103	4.98943e-27	1.49086e-24		ENSG00000143384	MCL1	-1.38814	4.0591e-13	1.23835e-10
ENSG00000197019	SERTAD1	-1.78937	2.34e-13	7.47e-11								ENSG00000112378	PERP	-1.49834	8.5805e-27	2.51458e-24		ENSG00000005001	PRSS22	-2.62778	4.56228e-13	1.36509e-10
ENSG00000076864	RAP1GAP	-2.19367	2.63e-13	8.25e-11								ENSG00000235750	KIAA0040	-3.94197	2.57014e-26	7.38988e-24		ENSG00000214814	FER1L6	-5.06846	7.47801e-13	2.19529e-10
ENSG00000171345	KRT19	-2.10127	2.72e-13	8.36e-11								ENSG00000011422	PLAUR	-3.44923	3.234e-26	9.12646e-24		ENSG00000143797	MBOAT2	-3.85527	8.71981e-13	2.51244e-10
ENSG00000118922	KLF12	-3.67087	2.79e-13	8.44e-11								ENSG00000188613	NANOS1	-3.76616	8.19903e-26	2.27173e-23		ENSG00000112378	PERP	-0.973973	1.44229e-12	4.08011e-10
ENSG00000170345	FOS	-2.85886	3.16e-13	9.39e-11								ENSG00000101928	MOSPD1	-2.02235	1.11836e-25	3.04335e-23		ENSG00000134668	SPOCD1	-4.47699	1.54773e-12	4.29535e-10
ENSG00000135046	ANXA1	-5.00809	3.59e-13	1.05e-10								ENSG00000171223	JUNB	-2.64978	1.24222e-25	3.32108e-23		ENSG00000181191	PJA1	-2.23717	1.57359e-12	4.29535e-10
ENSG00000101457	DNTTIP1	-2.42999	3.77e-13	1.08e-10								ENSG00000137819	PAQR5	-2.52482	1.69482e-25	4.45299e-23		ENSG00000163947	ARHGEF3	-1.38974	2.61308e-12	7.00981e-10
ENSG00000142669	SH3BGRL3	-1.88323	4.23e-13	1.19e-10								ENSG00000147533	GOLGA7	-2.16053	1.83852e-25	4.74868e-23		ENSG00000010438	PRSS3	-1.94566	4.80992e-12	1.26843e-09
ENSG00000196352	CD55	-5.21638	4.61e-13	1.28e-10								ENSG00000175482	POLD4	-3.08837	3.40073e-25	8.63728e-23		ENSG00000133985	TTC9	-2.24517	5.3493e-12	1.38716e-09
ENSG00000171346	KRT15	-2.60363	4.72e-13	1.29e-10								ENSG00000181191	PJA1	-3.25313	3.8287e-25	9.56484e-23		ENSG00000160712	IL6R	-5.5533	6.67886e-12	1.70355e-09
ENSG00000114115	RBP1	-3.38361	5.96e-13	1.6e-10								ENSG00000143797	MBOAT2	-5.18311	4.61098e-25	1.13334e-22		ENSG00000163898	LIPH	-3.35377	7.53767e-12	1.89159e-09
ENSG00000259230	CTD-2555C10.3	-3.77186	6.44e-13	1.7e-10								ENSG00000133805	AMPD3	-2.82513	4.79174e-25	1.15907e-22		ENSG00000144118	RALB	-1.25751	8.70504e-12	2.11628e-09
ENSG00000196924	FLNA	-2.34973	8.35e-13	2.17e-10								ENSG00000243927	MRPS6	-3.24657	7.67716e-25	1.828e-22		ENSG00000165474	GJB2	-1.97894	8.60574e-12	2.11628e-09
ENSG00000130589	HELZ2	-1.9171	8.76e-13	2.23e-10								ENSG00000134193	REG4	-5.38345	8.43461e-25	1.97746e-22		ENSG00000160588	MPZL3	-2.02466	1.09349e-11	2.61748e-09
ENSG00000141524	TMC6	-2.16032	8.98e-13	2.23e-10								ENSG00000005513	SOX8	-4.16787	1.06134e-24	2.45057e-22		ENSG00000188910	GJB3	-4.74941	1.17021e-11	2.75869e-09
ENSG00000176678	FOXL1	-3.11299	8.93e-13	2.23e-10								ENSG00000185022	MAFF	-2.69486	1.9872e-24	4.51985e-22		ENSG00000088826	SMOX	-1.19149	1.34211e-11	3.1167e-09
ENSG00000163082	SGPP2	-4.01632	1.58e-12	3.86e-10								ENSG00000133985	TTC9	-3.24906	3.91407e-24	8.77154e-22		ENSG00000066322	ELOVL1	-1.12832	1.40465e-11	3.21395e-09
ENSG00000197747	S100A10	-1.54586	1.61e-12	3.87e-10								ENSG00000196754	S100A2	-4.3018	8.95765e-24	1.97834e-21		ENSG00000228705	LINC00659	-5.14505	1.44195e-11	3.25149e-09
ENSG00000168143	FAM83B	-2.99001	2.22e-12	5.28e-10								ENSG00000116704	SLC35D1	-2.65113	1.02271e-23	2.22643e-21		ENSG00000197747	S100A10	-1.53431	1.60345e-11	3.56402e-09
ENSG00000007516	BAIAP3	-2.56182	3.15e-12	7.37e-10								ENSG00000134668	SPOCD1	-5.65153	1.77094e-23	3.80103e-21		ENSG00000013563	DNASE1L1	-1.10912	1.79619e-11	3.93618e-09
ENSG00000170421	KRT8	-2.18949	3.55e-12	8.19e-10								ENSG00000164251	F2RL1	-2.49797	2.88928e-23	6.11524e-21		ENSG00000138166	DUSP5	-6.00341	1.96901e-11	4.25498e-09
ENSG00000153391	INO80C	-2.61074	3.78e-12	8.61e-10								ENSG00000076864	RAP1GAP	-3.14742	3.32781e-23	6.94692e-21		ENSG00000253368	TRNP1	-2.53707	2.96153e-11	6.31211e-09
ENSG00000143344	RGL1	-1.8304	4.15e-12	9.33e-10								ENSG00000099617	EFNA2	-4.42099	3.48427e-23	7.17524e-21		ENSG00000198814	GK	-2.04913	3.13531e-11	6.5922e-09
ENSG00000069535	MAOB	-4.98269	4.42e-12	9.8e-10								ENSG00000179674	ARL14	-4.44353	3.81801e-23	7.75769e-21		ENSG00000042493	CAPG	-1.79237	3.44415e-11	7.145e-09
ENSG00000106258	CYP3A5	-2.49354	5.06e-12	1.11e-09								ENSG00000080031	PTPRH	-4.4065	4.52297e-23	8.9852e-21		ENSG00000243927	MRPS6	-2.13359	3.6549e-11	7.48245e-09
ENSG00000135074	ADAM19	-1.85903	5.13e-12	1.11e-09								ENSG00000139044	B4GALNT3	-2.55103	4.54006e-23	8.9852e-21		ENSG00000134954	ETS1	-2.54942	3.75889e-11	7.59541e-09
ENSG00000138623	SEMA7A	-3.74998	5.3e-12	1.13e-09								ENSG00000182378	PLCXD1	-2.41283	7.35884e-23	1.43771e-20		ENSG00000137819	PAQR5	-1.60038	4.05575e-11	8.09018e-09
ENSG00000172183	ISG20	-4.48276	5.47e-12	1.15e-09								ENSG00000135926	TMBIM1	-2.70704	7.66174e-23	1.47794e-20		ENSG00000142156	COL6A1	-3.19817	4.2741e-11	8.4178e-09
ENSG00000160161	CILP2	-2.49987	5.83e-12	1.2e-09								ENSG00000013588	GPRC5A	-2.60309	9.39923e-23	1.79044e-20		ENSG00000163297	ANTXR2	-1.99631	4.75777e-11	9.25328e-09
ENSG00000249898	CTD-2541M15.1	-2.60102	5.82e-12	1.2e-09								ENSG00000189334	S100A14	-3.66064	9.90394e-23	1.86329e-20		ENSG00000164023	SGMS2	-3.06998	6.06558e-11	1.16512e-08
ENSG00000182795	C1orf116	-2.17678	6.11e-12	1.24e-09								ENSG00000196878	LAMB3	-2.91582	1.59601e-22	2.96605e-20		ENSG00000164251	F2RL1	-1.63582	7.8585e-11	1.4911e-08
ENSG00000261116	RP3-523K23.2	-3.24053	6.69e-12	1.34e-09								ENSG00000134324	LPIN1	-1.7623	1.83256e-22	3.36463e-20		ENSG00000171345	KRT19	-2.17222	8.74641e-11	1.63958e-08
ENSG00000048471	SNX29	-1.56445	6.9e-12	1.35e-09								ENSG00000142669	SH3BGRL3	-2.6923	2.14703e-22	3.89508e-20		ENSG00000143344	RGL1	-2.16086	1.13684e-10	2.10573e-08
ENSG00000170537	TMC7	-2.29491	6.9e-12	1.35e-09								ENSG00000092820	EZR	-1.99381	2.73598e-22	4.90513e-20		ENSG00000025772	TOMM34	-1.3056	1.60552e-10	2.93886e-08
ENSG00000204282	TNRC6C-AS1	-2.62873	7e-12	1.35e-09								ENSG00000137331	IER3	-3.86747	2.79864e-22	4.95913e-20		ENSG00000176678	FOXL1	-3.20441	1.74366e-10	3.15461e-08
ENSG00000136002	ARHGEF4	-4.01103	7.78e-12	1.49e-09								ENSG00000120899	PTK2B	-2.5336	3.10151e-22	5.43263e-20		ENSG00000154217	PITPNC1	-2.01506	1.79134e-10	3.20361e-08
ENSG00000196878	LAMB3	-2.22379	7.98e-12	1.51e-09								ENSG00000107281	NPDC1	-2.27085	4.04904e-22	7.01175e-20		ENSG00000100097	LGALS1	-4.23381	1.92846e-10	3.37134e-08
ENSG00000057657	PRDM1	-2.74717	8.3e-12	1.55e-09								ENSG00000159267	HLCS	-1.89692	5.38081e-22	9.21327e-20		ENSG00000197892	KIF13B	-1.1719	1.91999e-10	3.37134e-08
ENSG00000153071	DAB2	-1.3109	8.76e-12	1.62e-09								ENSG00000231991	ANXA2P2	-3.06369	5.69809e-22	9.64814e-20		ENSG00000107960	OBFC1	-1.57701	2.41748e-10	4.17928e-08
ENSG00000107984	DKK1	-6.38876	9.53e-12	1.74e-09								ENSG00000213722	DDAH2	-2.89449	7.71092e-22	1.29128e-19		ENSG00000185989	RASA3	-1.87232	2.76983e-10	4.73581e-08
ENSG00000118276	B4GALT6	-2.17609	1.07e-11	1.94e-09								ENSG00000010438	PRSS3	-2.6811	1.04126e-21	1.72475e-19		ENSG00000188042	ARL4C	-1.99047	3.24876e-10	5.49428e-08
ENSG00000189050	RNFT1	-0.978465	1.09e-11	1.95e-09								ENSG00000135549	PKIB	-3.12145	1.26206e-21	2.06801e-19		ENSG00000125744	RTN2	-3.81148	4.29695e-10	7.18884e-08
ENSG00000116014	KISS1R	-4.59514	1.18e-11	2.08e-09								ENSG00000228705	LINC00659	-7.24733	1.4481e-21	2.34762e-19		ENSG00000179674	ARL14	-3.08199	4.88487e-10	8.0855e-08
ENSG00000130584	ZBTB46	-3.58318	1.2e-11	2.09e-09								ENSG00000042493	CAPG	-2.55586	1.7853e-21	2.8638e-19		ENSG00000003436	TFPI	-4.13543	5.718e-10	9.36488e-08
ENSG00000124171	PARD6B	-1.57223	1.27e-11	2.2e-09								ENSG00000204610	TRIM15	-2.21992	1.86616e-21	2.96233e-19		ENSG00000151689	INPP1	-1.67235	6.46758e-10	1.04822e-07
ENSG00000125266	EFNB2	-1.6051	1.44e-11	2.48e-09								ENSG00000197747	S100A10	-2.16503	2.25294e-21	3.53943e-19		ENSG00000169908	TM4SF1	-2.33008	6.67575e-10	1.0708e-07
ENSG00000167470	MIDN	-1.77005	1.59e-11	2.68e-09								ENSG00000075945	KIFAP3	-1.77743	2.4918e-21	3.87475e-19		ENSG00000171223	JUNB	-1.56747	6.86485e-10	1.0899e-07
ENSG00000188042	ARL4C	-1.78986	1.59e-11	2.68e-09								ENSG00000109321	AREG	-3.85197	3.42101e-21	5.26593e-19		ENSG00000126458	RRAS	-1.72281	7.35609e-10	1.15609e-07
ENSG00000124920	MYRF	-2.28255	1.66e-11	2.76e-09								ENSG00000117595	IRF6	-1.62596	5.06273e-21	7.71509e-19		ENSG00000137364	TPMT	-1.74783	8.06379e-10	1.25465e-07
ENSG00000143797	MBOAT2	-4.16038	1.68e-11	2.76e-09								ENSG00000173334	TRIB1	-3.27771	5.28532e-21	7.97456e-19		ENSG00000130589	HELZ2	-2.03786	8.33724e-10	1.28435e-07
ENSG00000166510	CCDC68	-2.42324	1.83e-11	2.98e-09								ENSG00000134954	ETS1	-3.43794	5.45915e-21	8.15607e-19		ENSG00000157227	MMP14	-1.87966	1.07327e-09	1.63715e-07
ENSG00000174718	KIAA1551	-1.27847	1.86e-11	3.01e-09								ENSG00000163814	CDCP1	-1.88781	1.14489e-20	1.68483e-18		ENSG00000125266	EFNB2	-1.29413	1.14644e-09	1.73179e-07
ENSG00000151718	WWC2	-2.63651	2.28e-11	3.65e-09								ENSG00000185761	ADAMTSL5	-2.90337	1.14983e-20	1.68483e-18		ENSG00000198959	TGM2	-2.30694	1.22468e-09	1.83219e-07
ENSG00000116285	ERRFI1	-1.75158	2.51e-11	3.97e-09								ENSG00000185567	AHNAK2	-8.55228	1.3257e-20	1.92403e-18		ENSG00000232803	RP11-93B14.5	-5.48539	1.30502e-09	1.93379e-07
ENSG00000111057	KRT18	-2.20318	2.83e-11	4.39e-09								ENSG00000150093	ITGB1	-2.0261	1.70817e-20	2.45574e-18		ENSG00000175482	POLD4	-1.88495	1.96036e-09	2.87748e-07
ENSG00000163814	CDCP1	-1.28819	2.83e-11	4.39e-09								ENSG00000136802	LRRC8A	-2.28901	2.1583e-20	3.07387e-18		ENSG00000135926	TMBIM1	-1.64437	2.06032e-09	2.99594e-07
ENSG00000116191	RALGPS2	-1.1913	3.24e-11	4.98e-09								ENSG00000149218	ENDOD1	-1.79027	2.42102e-20	3.4161e-18		ENSG00000257743	RP11-1220K2.2	1.93241	2.29639e-09	3.30829e-07
ENSG00000116704	SLC35D1	-1.73609	3.29e-11	5.01e-09								ENSG00000167470	MIDN	-2.58967	2.8705e-20	4.01317e-18		ENSG00000124145	SDC4	-1.14176	2.33434e-09	3.33211e-07
ENSG00000139725	RHOF	-1.75017	3.31e-11	5.01e-09								ENSG00000021355	SERPINB1	-1.70081	3.16951e-20	4.39092e-18		ENSG00000166510	CCDC68	-2.68526	2.49799e-09	3.5333e-07
ENSG00000163947	ARHGEF3	-1.54654	3.99e-11	5.98e-09								ENSG00000147065	MSN	-4.04712	3.57262e-20	4.90479e-18		ENSG00000178607	ERN1	-1.26071	3.00254e-09	4.20869e-07
ENSG00000110888	CAPRIN2	-1.91927	4.1e-11	6.08e-09								ENSG00000169908	TM4SF1	-3.44583	4.14806e-20	5.64396e-18		ENSG00000100221	JOSD1	-1.09964	3.13788e-09	4.35913e-07
ENSG00000058085	LAMC2	-3.8497	4.31e-11	6.34e-09								ENSG00000110888	CAPRIN2	-2.88175	6.0491e-20	8.15772e-18		ENSG00000071054	MAP4K4	-1.09249	3.4048e-09	4.67719e-07
ENSG00000214814	FER1L6	-5.04024	4.38e-11	6.39e-09								ENSG00000088002	SULT2B1	-5.31972	9.48733e-20	1.26822e-17		ENSG00000147041	SYTL5	-3.55176	3.42695e-09	4.67719e-07
ENSG00000123240	OPTN	-1.90966	4.59e-11	6.63e-09								ENSG00000114115	RBP1	-4.44055	9.80962e-20	1.29314e-17		ENSG00000101188	NTSR1	-4.39924	4.00554e-09	5.41932e-07
ENSG00000160712	IL6R	-4.64845	4.95e-11	7.09e-09								ENSG00000125744	RTN2	-5.04325	9.84341e-20	1.29314e-17		ENSG00000142669	SH3BGRL3	-1.62805	4.46221e-09	5.98513e-07
ENSG00000147168	IL2RG	-1.7094	5.39e-11	7.65e-09								ENSG00000131069	ACSS2	-1.82885	1.08748e-19	1.41642e-17		ENSG00000106123	EPHB6	-4.70069	4.64976e-09	6.18339e-07
ENSG00000144821	MYH15	-4.31725	5.45e-11	7.67e-09								ENSG00000130340	SNX9	-1.65319	2.15526e-19	2.78339e-17		ENSG00000160360	GPSM1	-3.44422	4.98749e-09	6.5763e-07
ENSG00000137877	SPTBN5	-3.37023	5.71e-11	7.91e-09								ENSG00000196924	FLNA	-3.37015	2.46521e-19	3.15692e-17		ENSG00000165169	DYNLT3	-2.08101	7.18182e-09	9.39008e-07
ENSG00000143384	MCL1	-1.37776	5.71e-11	7.91e-09								ENSG00000066248	NGEF	-3.22084	3.85288e-19	4.89284e-17		ENSG00000066248	NGEF	-2.12505	7.44156e-09	9.6486e-07
ENSG00000100439	ABHD4	-1.10467	5.9e-11	8.03e-09								ENSG00000151689	INPP1	-2.39483	4.71614e-19	5.93961e-17		ENSG00000197956	S100A6	-1.56151	7.57413e-09	9.73933e-07
ENSG00000231991	ANXA2P2	-2.10338	5.87e-11	8.03e-09								ENSG00000025772	TOMM34	-1.82371	6.03267e-19	7.5354e-17		ENSG00000107738	C10orf54	-3.11569	7.81035e-09	9.8746e-07
ENSG00000066248	NGEF	-2.31632	6.2e-11	8.38e-09								ENSG00000163297	ANTXR2	-2.68671	6.18519e-19	7.6631e-17		ENSG00000116285	ERRFI1	-1.30686	7.80885e-09	9.8746e-07
ENSG00000099960	SLC7A4	-2.43978	7.09e-11	9.5e-09								ENSG00000128578	STRIP2	-2.06401	7.2063e-19	8.8562e-17		ENSG00000130340	SNX9	-1.05376	7.86973e-09	9.8746e-07
ENSG00000163297	ANTXR2	-1.89379	7.51e-11	9.99e-09								ENSG00000110628	SLC22A18	-2.2656	7.55917e-19	9.21553e-17		ENSG00000185222	WBP5	-1.24385	8.42899e-09	1.04917e-06
ENSG00000228903	RASA4CP	-4.3559	7.72e-11	1.02e-08								ENSG00000175793	SFN	-2.40581	1.13264e-18	1.36987e-16		ENSG00000137331	IER3	-2.3039	8.86246e-09	1.09437e-06
ENSG00000133985	TTC9	-2.24413	8.3e-11	1.09e-08								ENSG00000196700	ZNF512B	-2.14307	1.87846e-18	2.254e-16		ENSG00000136167	LCP1	-2.52046	9.31897e-09	1.14168e-06
ENSG00000073711	PPP2R3A	-1.27736	9.4e-11	1.22e-08								ENSG00000165092	ALDH1A1	1.64234	2.64311e-18	3.14675e-16		ENSG00000140522	RLBP1	-2.8227	1.07706e-08	1.30922e-06
ENSG00000104067	TJP1	-0.918165	1e-10	1.29e-08								ENSG00000250539	KRT8P33	-2.67308	3.46152e-18	4.08916e-16		ENSG00000116977	LGALS8	-1.10286	1.14055e-08	1.37565e-06
ENSG00000185567	AHNAK2	-6.4974	1.06e-10	1.36e-08								ENSG00000166803	KIAA0101	1.97015	3.89908e-18	4.57062e-16		ENSG00000148180	GSN	-2.18841	1.16189e-08	1.3906e-06
ENSG00000254285	KRT8P3	-2.04307	1.09e-10	1.39e-08								ENSG00000138434	SSFA2	-1.93604	5.54199e-18	6.4469e-16		ENSG00000073711	PPP2R3A	-1.48883	1.21894e-08	1.44775e-06
ENSG00000163191	S100A11	-1.43578	1.22e-10	1.53e-08								ENSG00000214655	ZSWIM8	-1.46731	6.39975e-18	7.38831e-16		ENSG00000235314	LINC00957	-2.60209	1.26705e-08	1.49348e-06
ENSG00000189369	GSPT2	-1.30462	1.22e-10	1.53e-08								ENSG00000136153	LMO7	-1.97546	8.14758e-18	9.29818e-16		ENSG00000103089	FA2H	-1.52028	1.30822e-08	1.519e-06
ENSG00000080031	PTPRH	-3.50704	1.54e-10	1.88e-08								ENSG00000170345	FOS	-3.85967	8.1761e-18	9.29818e-16		ENSG00000166311	SMPD1	-1.86821	1.30567e-08	1.519e-06
ENSG00000135549	PKIB	-2.21255	1.54e-10	1.88e-08								ENSG00000138166	DUSP5	-7.64437	1.20346e-17	1.34849e-15		ENSG00000051620	HEBP2	-1.0414	1.3628e-08	1.57065e-06
ENSG00000169641	LUZP1	-1.04298	1.52e-10	1.88e-08								ENSG00000144118	RALB	-1.58489	1.20314e-17	1.34849e-15		ENSG00000135046	ANXA1	-4.07404	1.48083e-08	1.69414e-06
ENSG00000185033	SEMA4B	-1.86759	1.55e-10	1.88e-08								ENSG00000171345	KRT19	-2.86766	1.24701e-17	1.38709e-15		ENSG00000186529	CYP4F3	-2.38125	1.55794e-08	1.75652e-06
ENSG00000144063	MALL	-2.36518	1.61e-10	1.93e-08								ENSG00000073111	MCM2	1.68558	1.56813e-17	1.73164e-15		ENSG00000203799	CCDC162P	-2.612	1.55633e-08	1.75652e-06
ENSG00000010438	PRSS3	-1.90021	1.62e-10	1.94e-08								ENSG00000149260	CAPN5	-1.90767	1.62733e-17	1.78409e-15		ENSG00000115084	SLC35F5	-1.22711	1.6273e-08	1.80864e-06
ENSG00000184060	ADAP2	-2.03398	1.69e-10	2.01e-08								ENSG00000163191	S100A11	-2.11384	1.78115e-17	1.93878e-15		ENSG00000155189	AGPAT5	-1.52482	1.62742e-08	1.80864e-06
ENSG00000151689	INPP1	-1.66111	1.86e-10	2.19e-08								ENSG00000189171	S100A13	-2.88048	2.19279e-17	2.36992e-15		ENSG00000021355	SERPINB1	-1.03829	1.65227e-08	1.82324e-06
ENSG00000196754	S100A2	-3.10778	1.88e-10	2.2e-08								ENSG00000178607	ERN1	-1.79502	2.2157e-17	2.37782e-15		ENSG00000249898	CTD-2541M15.1	-2.87565	1.95521e-08	2.14233e-06
ENSG00000101928	MOSPD1	-1.41887	1.95e-10	2.25e-08								ENSG00000254285	KRT8P3	-3.01712	2.36391e-17	2.51913e-15		ENSG00000140526	ABHD2	-1.25626	2.11236e-08	2.28336e-06
ENSG00000137819	PAQR5	-1.68997	1.95e-10	2.25e-08								ENSG00000198814	GK	-2.59828	2.85916e-17	3.02574e-15		ENSG00000162852	CNST	-0.949049	2.11327e-08	2.28336e-06
ENSG00000154217	PITPNC1	-1.83207	2.15e-10	2.46e-08								ENSG00000160752	FDPS	-1.46106	3.07539e-17	3.23213e-15		ENSG00000151715	TMEM45B	-1.27325	2.33491e-08	2.48828e-06
ENSG00000120899	PTK2B	-1.68908	2.22e-10	2.52e-08								ENSG00000165474	GJB2	-2.44326	3.13057e-17	3.26759e-15		ENSG00000255112	CHMP1B	-1.02711	2.32466e-08	2.48828e-06
ENSG00000102265	TIMP1	-2.14176	2.24e-10	2.53e-08								ENSG00000079385	CEACAM1	-3.09187	4.38068e-17	4.5413e-15		ENSG00000189369	GSPT2	-1.32754	2.82758e-08	2.99281e-06
ENSG00000124466	LYPD3	-3.7802	2.42e-10	2.72e-08								ENSG00000100003	SEC14L2	-3.30948	4.97481e-17	5.12237e-15		ENSG00000168143	FAM83B	-2.65445	3.27573e-08	3.44372e-06
ENSG00000035862	TIMP2	-2.67528	2.46e-10	2.75e-08								ENSG00000124920	MYRF	-3.21746	6.14154e-17	6.28127e-15		ENSG00000213722	DDAH2	-1.66822	3.52436e-08	3.68023e-06
ENSG00000137700	SLC37A4	0.536666	2.51e-10	2.78e-08								ENSG00000197892	KIF13B	-1.54547	7.38435e-17	7.50201e-15		ENSG00000163814	CDCP1	-1.11272	3.72418e-08	3.86297e-06
ENSG00000148180	GSN	-2.10712	2.54e-10	2.79e-08								ENSG00000142733	MAP3K6	-2.9774	7.62819e-17	7.69841e-15		ENSG00000204634	TBC1D8	-1.25195	3.93641e-08	4.05607e-06
ENSG00000175482	POLD4	-2.10334	2.9e-10	3.18e-08								ENSG00000185989	RASA3	-2.46314	7.71319e-17	7.73298e-15		ENSG00000136143	SUCLA2	-1.00485	4.29766e-08	4.39916e-06
ENSG00000171223	JUNB	-1.76397	2.94e-10	3.2e-08								ENSG00000118515	SGK1	-3.04262	7.85459e-17	7.77247e-15		ENSG00000196352	CD55	-4.91536	6.20559e-08	6.31064e-06
ENSG00000079385	CEACAM1	-2.20932	3.43e-10	3.7e-08								ENSG00000162241	SLC25A45	-3.89065	7.83102e-17	7.77247e-15		ENSG00000048471	SNX29	-1.61998	6.56118e-08	6.62892e-06
ENSG00000155189	AGPAT5	-1.33853	3.54e-10	3.79e-08								ENSG00000121440	PDZRN3	1.64249	8.17134e-17	8.03374e-15		ENSG00000169213	RAB3B	-2.53986	6.78706e-08	6.81289e-06
ENSG00000140522	RLBP1	-2.4351	3.6e-10	3.84e-08								ENSG00000154217	PITPNC1	-2.58227	1.1095e-16	1.08382e-14		ENSG00000070159	PTPN3	-1.22919	7.45991e-08	7.41287e-06
ENSG00000013588	GPRC5A	-1.77301	3.85e-10	4.08e-08								ENSG00000100994	PYGB	-1.62609	1.36617e-16	1.32606e-14		ENSG00000136802	LRRC8A	-1.33277	7.48004e-08	7.41287e-06
ENSG00000106366	SERPINE1	-3.27543	3.99e-10	4.19e-08								ENSG00000213406	ANXA2P1	-3.17975	1.47219e-16	1.41992e-14		ENSG00000173334	TRIB1	-1.89045	7.60693e-08	7.4909e-06
ENSG00000253305	PCDHGB6	-1.36636	4.56e-10	4.76e-08								ENSG00000168143	FAM83B	-3.79256	1.5622e-16	1.49725e-14		ENSG00000185033	SEMA4B	-1.3906	8.33289e-08	8.15418e-06
ENSG00000110944	IL23A	-3.22397	4.64e-10	4.82e-08								ENSG00000142867	BCL10	-1.69729	1.97251e-16	1.87869e-14		ENSG00000196924	FLNA	-2.01146	8.49374e-08	8.25963e-06
ENSG00000100036	SLC35E4	-1.98017	4.71e-10	4.83e-08								ENSG00000116977	LGALS8	-1.59299	2.00279e-16	1.89568e-14		ENSG00000139044	B4GALNT3	-1.41224	8.99212e-08	8.68996e-06
ENSG00000136059	VILL	-2.825	4.71e-10	4.83e-08								ENSG00000176678	FOXL1	-3.88796	2.56429e-16	2.41217e-14		ENSG00000197019	SERTAD1	-1.70488	9.71892e-08	9.33437e-06
ENSG00000131037	EPS8L1	-2.30923	5.01e-10	5.11e-08								ENSG00000164104	HMGB2	1.85011	2.8488e-16	2.66337e-14		ENSG00000196611	MMP1	-9.4666	1.04879e-07	1.00111e-05
ENSG00000137094	DNAJB5	-3.21649	5.17e-10	5.24e-08								ENSG00000096968	JAK2	-2.37431	3.4754e-16	3.22937e-14		ENSG00000013364	MVP	-1.66343	1.09999e-07	1.04358e-05
ENSG00000077585	GPR137B	-1.04569	5.51e-10	5.51e-08								ENSG00000151693	ASAP2	-2.09118	4.13264e-16	3.81681e-14		ENSG00000150093	ITGB1	-1.15146	1.18181e-07	1.11441e-05
ENSG00000170542	SERPINB9	-1.05122	5.47e-10	5.51e-08								ENSG00000100221	JOSD1	-1.52322	4.19297e-16	3.84919e-14		ENSG00000196754	S100A2	-2.59675	1.28563e-07	1.205e-05
ENSG00000143669	LYST	-1.95582	5.87e-10	5.84e-08								ENSG00000071054	MAP4K4	-1.50039	6.06544e-16	5.53481e-14		ENSG00000099860	GADD45B	-1.57382	1.33834e-07	1.2469e-05
ENSG00000047056	WDR37	-0.707243	6.03e-10	5.96e-08								ENSG00000106258	CYP3A5	-3.45283	6.23185e-16	5.65281e-14		ENSG00000088002	SULT2B1	-3.51198	1.43457e-07	1.32592e-05
ENSG00000005001	PRSS22	-3.49968	6.31e-10	6.21e-08								ENSG00000186594	MIR22HG	-3.04567	7.95624e-16	7.17427e-14		ENSG00000159433	STARD9	1.37017	1.4402e-07	1.32592e-05
ENSG00000182378	PLCXD1	-1.66227	6.52e-10	6.37e-08								ENSG00000187678	SPRY4	-2.76952	8.11616e-16	7.27542e-14		ENSG00000102760	RGCC	-2.9188	1.45563e-07	1.33225e-05
ENSG00000172828	CES3	0.826452	6.77e-10	6.58e-08								ENSG00000124143	ARHGAP40	-4.60043	8.55734e-16	7.62604e-14		ENSG00000118515	SGK1	-1.95436	1.52047e-07	1.38345e-05
ENSG00000124145	SDC4	-1.02524	7.82e-10	7.55e-08								ENSG00000144366	GULP1	-4.14889	8.84462e-16	7.83623e-14		ENSG00000003402	CFLAR	-1.01113	1.62219e-07	1.46742e-05
ENSG00000187678	SPRY4	-1.85269	7.89e-10	7.58e-08								ENSG00000153391	INO80C	-3.66004	9.05307e-16	7.97455e-14		ENSG00000142867	BCL10	-1.07229	2.05609e-07	1.84918e-05
ENSG00000135926	TMBIM1	-1.83129	8.48e-10	8.1e-08								ENSG00000100097	LGALS1	-5.10686	9.50638e-16	8.32573e-14		ENSG00000174718	KIAA1551	-1.25515	2.32891e-07	2.0825e-05
ENSG00000160360	GPSM1	-4.2433	8.75e-10	8.31e-08								ENSG00000131037	EPS8L1	-3.27758	1.02522e-15	8.9276e-14		ENSG00000007516	BAIAP3	-2.43106	2.37133e-07	2.08449e-05
ENSG00000115170	ACVR1	-0.776649	9.01e-10	8.51e-08								ENSG00000125089	SH3TC1	-2.21201	1.04031e-15	9.00756e-14		ENSG00000101844	ATG4A	-1.26398	2.36986e-07	2.08449e-05
ENSG00000163898	LIPH	-2.87164	9.64e-10	9.04e-08								ENSG00000161714	PLCD3	-2.1581	1.16499e-15	1.00301e-13		ENSG00000231991	ANXA2P2	-1.67226	2.34832e-07	2.08449e-05
ENSG00000185989	RASA3	-1.7187	9.68e-10	9.04e-08								ENSG00000104067	TJP1	-1.39311	1.3025e-15	1.1151e-13		ENSG00000137648	TMPRSS4	-1.51475	2.50928e-07	2.19337e-05
ENSG00000090530	LEPREL1	-3.74863	9.89e-10	9.05e-08								ENSG00000152413	HOMER1	-1.84433	1.53038e-15	1.30288e-13		ENSG00000136002	ARHGEF4	-4.15049	2.60177e-07	2.2615e-05
ENSG00000112414	GPR126	-1.54238	9.86e-10	9.05e-08								ENSG00000197457	STMN3	-3.86315	1.5702e-15	1.32935e-13		ENSG00000186862	PDZD7	-1.24122	2.69471e-07	2.32928e-05
ENSG00000117016	RIMS3	-2.93097	9.92e-10	9.05e-08								ENSG00000106366	SERPINE1	-4.3841	1.66546e-15	1.4022e-13		ENSG00000130513	GDF15	-2.0149	2.82647e-07	2.42967e-05
ENSG00000119801	YPEL5	-1.12225	9.81e-10	9.05e-08								ENSG00000152503	TRIM36	-3.2001	1.76725e-15	1.47973e-13		ENSG00000163191	S100A11	-1.27132	2.88304e-07	2.46468e-05
ENSG00000116977	LGALS8	-1.07331	1.02e-09	9.22e-08								ENSG00000130066	SAT1	-2.41456	1.80591e-15	1.50384e-13		ENSG00000170537	TMC7	-2.35344	3.0932e-07	2.6299e-05
ENSG00000146112	PPP1R18	-1.72626	1.03e-09	9.33e-08								ENSG00000137648	TMPRSS4	-2.33891	1.9649e-15	1.62734e-13		ENSG00000115525	ST3GAL5	-1.65137	3.22848e-07	2.72609e-05
ENSG00000144655	CSRNP1	-1.29243	1.07e-09	9.65e-08								ENSG00000253368	TRNP1	-2.98602	1.97581e-15	1.62754e-13		ENSG00000167460	TPM4	-0.93691	3.24138e-07	2.72609e-05
ENSG00000180198	RCC1	0.716575	1.13e-09	1.01e-07								ENSG00000197956	S100A6	-2.14531	2.42972e-15	1.99067e-13		ENSG00000151718	WWC2	-2.67231	3.3155e-07	2.77343e-05
ENSG00000137575	SDCBP	-1.11815	1.14e-09	1.01e-07								ENSG00000070159	PTPN3	-1.80828	2.45986e-15	2.00459e-13		ENSG00000184060	ADAP2	-2.48987	3.41386e-07	2.84044e-05
ENSG00000079393	DUSP13	-3.61684	1.15e-09	1.02e-07								ENSG00000085840	ORC1	1.78251	2.52988e-15	2.05068e-13		ENSG00000156510	HKDC1	-1.40621	3.53272e-07	2.9237e-05
ENSG00000165046	LETM2	-1.83111	1.17e-09	1.02e-07								ENSG00000117016	RIMS3	-4.02382	2.58965e-15	2.08803e-13		ENSG00000100036	SLC35E4	-1.95484	3.6892e-07	3.03705e-05
ENSG00000134531	EMP1	-4.35654	1.21e-09	1.06e-07								ENSG00000100558	PLEK2	-1.84985	2.95871e-15	2.37304e-13		ENSG00000143669	LYST	-2.22498	3.79222e-07	3.10543e-05
ENSG00000161714	PLCD3	-1.47899	1.22e-09	1.06e-07								ENSG00000165097	KDM1B	-1.6415	3.02733e-15	2.41537e-13		ENSG00000198363	ASPH	-1.16596	3.98604e-07	3.24706e-05
ENSG00000068697	LAPTM4A	-0.686352	1.39e-09	1.2e-07								ENSG00000189369	GSPT2	-1.89072	3.15421e-15	2.50349e-13		ENSG00000165240	ATP7A	-1.45855	4.1373e-07	3.35272e-05
ENSG00000196937	FAM3C	-1.36216	1.39e-09	1.2e-07								ENSG00000137094	DNAJB5	-4.46232	3.49241e-15	2.75756e-13		ENSG00000101782	RIOK3	-1.02801	4.24714e-07	3.4239e-05
ENSG00000147889	CDKN2A	-2.19078	1.41e-09	1.2e-07								ENSG00000132780	NASP	1.35014	3.61539e-15	2.83994e-13		ENSG00000113070	HBEGF	-1.77109	4.41142e-07	3.538e-05
ENSG00000109321	AREG	-2.85969	1.44e-09	1.23e-07								ENSG00000106089	STX1A	-2.05441	3.78291e-15	2.94828e-13		ENSG00000196937	FAM3C	-1.35226	4.50723e-07	3.59631e-05
ENSG00000164251	F2RL1	-1.6997	1.45e-09	1.23e-07								ENSG00000176903	PNMA1	-2.2018	3.792e-15	2.94828e-13		ENSG00000144655	CSRNP1	-1.25194	4.69794e-07	3.72935e-05
ENSG00000175505	CLCF1	-3.39198	1.47e-09	1.24e-07								ENSG00000182795	C1orf116	-3.09309	3.86286e-15	2.98813e-13		ENSG00000124466	LYPD3	-3.46333	5.10051e-07	4.02837e-05
ENSG00000197457	STMN3	-2.68877	1.49e-09	1.25e-07								ENSG00000214207	KRT18P10	-3.10079	4.08309e-15	3.14254e-13		ENSG00000125753	VASP	-1.34756	5.23277e-07	4.11195e-05
ENSG00000112769	LAMA4	-3.92681	1.51e-09	1.26e-07								ENSG00000137364	TPMT	-2.2298	4.51623e-15	3.45844e-13		ENSG00000120899	PTK2B	-1.31447	5.48963e-07	4.29212e-05
ENSG00000066084	DIP2B	-0.867349	1.54e-09	1.28e-07								ENSG00000187531	SIRT7	-1.88147	4.95005e-15	3.77169e-13		ENSG00000065613	SLK	-1.10166	5.7991e-07	4.51141e-05
ENSG00000117595	IRF6	-1.1227	1.54e-09	1.28e-07								ENSG00000006453	BAIAP2L1	-1.75796	5.16031e-15	3.91233e-13		ENSG00000074319	TSG101	-0.752502	6.22068e-07	4.8153e-05
ENSG00000129657	SEC14L1	-1.44153	1.55e-09	1.28e-07								ENSG00000105339	DENND3	-3.22208	5.40682e-15	4.07894e-13		ENSG00000117016	RIMS3	-2.74089	6.4416e-07	4.96163e-05
ENSG00000125089	SH3TC1	-1.45979	1.59e-09	1.3e-07								ENSG00000130589	HELZ2	-2.58233	5.50123e-15	4.12972e-13		ENSG00000119801	YPEL5	-1.27144	6.70096e-07	5.13597e-05
ENSG00000197892	KIF13B	-1.08279	1.59e-09	1.3e-07								ENSG00000148180	GSN	-2.99694	5.57591e-15	4.16526e-13		ENSG00000169435	RASSF6	-1.14566	6.73936e-07	5.14008e-05
ENSG00000167748	KLK1	-2.88253	1.73e-09	1.4e-07								ENSG00000078804	TP53INP2	-4.46314	6.29343e-15	4.67832e-13		ENSG00000131037	EPS8L1	-2.05409	6.92121e-07	5.25303e-05
ENSG00000010404	IDS	-1.16566	1.86e-09	1.5e-07								ENSG00000115738	ID2	1.66237	6.4392e-15	4.76344e-13		ENSG00000005513	SOX8	-2.12612	7.63222e-07	5.7367e-05
ENSG00000012223	LTF	1.90197	2.03e-09	1.63e-07								ENSG00000173442	EHBP1L1	-2.01947	6.53514e-15	4.81106e-13		ENSG00000198648	STK39	-1.14523	7.60677e-07	5.7367e-05
ENSG00000171206	TRIM8	-1.30861	2.13e-09	1.7e-07								ENSG00000101188	NTSR1	-5.38743	6.80386e-15	4.98481e-13		ENSG00000161714	PLCD3	-1.33332	7.69931e-07	5.75931e-05
ENSG00000185022	MAFF	-1.75746	2.19e-09	1.74e-07								ENSG00000051620	HEBP2	-1.42992	8.55158e-15	6.2056e-13		ENSG00000136560	TANK	-0.892346	8.60907e-07	6.40902e-05
ENSG00000250539	KRT8P33	-1.78546	2.26e-09	1.79e-07								ENSG00000136167	LCP1	-3.2949	8.52804e-15	6.2056e-13		ENSG00000013588	GPRC5A	-1.30703	8.96609e-07	6.64302e-05
ENSG00000181649	PHLDA2	-1.8618	2.29e-09	1.79e-07								ENSG00000007516	BAIAP3	-3.56031	9.32307e-15	6.73338e-13		ENSG00000135074	ADAM19	-1.78375	9.02348e-07	6.65385e-05
ENSG00000256940	RP11-783K16.5	-2.35831	2.29e-09	1.79e-07								ENSG00000007062	PROM1	2.09143	9.82316e-15	7.06109e-13		ENSG00000117266	CDK18	1.26313	9.58531e-07	7.03481e-05
ENSG00000213722	DDAH2	-1.94094	2.57e-09	2e-07								ENSG00000124466	LYPD3	-4.62059	9.97592e-15	7.13723e-13		ENSG00000091317	CMTM6	-1.09253	1.01764e-06	7.39879e-05
ENSG00000067082	KLF6	-2.19915	2.59e-09	2e-07								ENSG00000145604	SKP2	1.55215	1.03564e-14	7.37484e-13		ENSG00000151693	ASAP2	-1.25941	1.01704e-06	7.39879e-05
ENSG00000151693	ASAP2	-1.36517	2.59e-09	2e-07								ENSG00000085831	TTC39A	-1.51455	1.10721e-14	7.8478e-13		ENSG00000115738	ID2	0.987539	1.03651e-06	7.50094e-05
ENSG00000166446	CDYL2	-2.10985	2.89e-09	2.22e-07								ENSG00000144655	CSRNP1	-1.91181	1.25533e-14	8.85645e-13		ENSG00000197506	SLC28A3	-2.99916	1.04196e-06	7.50549e-05
ENSG00000100228	RAB36	-1.39318	3.09e-09	2.36e-07								ENSG00000113369	ARRDC3	-2.44156	1.29267e-14	9.07785e-13		ENSG00000099337	KCNK6	-1.52642	1.06683e-06	7.64925e-05
ENSG00000116954	RRAGC	-1.23091	3.35e-09	2.55e-07								ENSG00000197019	SERTAD1	-2.43984	1.37201e-14	9.59082e-13		ENSG00000151376	ME3	0.932987	1.07588e-06	7.67874e-05
ENSG00000198576	ARC	-3.74835	3.62e-09	2.74e-07								ENSG00000117394	SLC2A1	-1.9751	1.62482e-14	1.13062e-12		ENSG00000075651	PLD1	-1.53089	1.1092e-06	7.88037e-05
ENSG00000272695	GAS6-AS2	-2.41573	3.7e-09	2.79e-07								ENSG00000160588	MPZL3	-2.28653	1.64247e-14	1.13771e-12		ENSG00000166401	SERPINB8	-2.35927	1.15536e-06	8.17102e-05
ENSG00000141449	GREB1L	-1.13535	3.72e-09	2.8e-07								ENSG00000188042	ARL4C	-2.41942	1.73109e-14	1.19367e-12		ENSG00000133135	RNF128	-0.870767	1.17402e-06	8.26542e-05
ENSG00000196923	PDLIM7	-2.01424	3.77e-09	2.82e-07								ENSG00000099960	SLC7A4	-3.52692	1.94778e-14	1.33704e-12		ENSG00000074370	ATP2A3	-1.48514	1.18393e-06	8.29765e-05
ENSG00000096968	JAK2	-1.56265	3.8e-09	2.83e-07								ENSG00000085117	CD82	-2.37048	2.20825e-14	1.50903e-12		ENSG00000100422	CERK	-1.83035	1.20914e-06	8.43632e-05
ENSG00000117868	ESYT2	-1.95358	4.49e-09	3.33e-07								ENSG00000121039	RDH10	-2.36269	2.22618e-14	1.5145e-12		ENSG00000076864	RAP1GAP	-1.61751	1.21556e-06	8.44328e-05
ENSG00000168679	SLC16A4	-2.95005	4.69e-09	3.47e-07								ENSG00000140526	ABHD2	-1.71401	2.33531e-14	1.58168e-12		ENSG00000073737	DHRS9	-7.51723	1.28113e-06	8.85913e-05
ENSG00000005381	MPO	-4.92541	4.83e-09	3.55e-07								ENSG00000124145	SDC4	-1.47037	2.65332e-14	1.78911e-12		ENSG00000085831	TTC39A	-0.944417	1.31242e-06	9.03534e-05
ENSG00000085832	EPS15	-0.782327	4.86e-09	3.56e-07								ENSG00000204634	TBC1D8	-1.72747	3.55153e-14	2.38422e-12		ENSG00000173442	EHBP1L1	-1.25196	1.35133e-06	9.26228e-05
ENSG00000147533	GOLGA7	-1.32465	4.91e-09	3.58e-07								ENSG00000100297	MCM5	1.74666	3.59596e-14	2.40346e-12		ENSG00000196139	AKR1C3	-0.806249	1.37157e-06	9.35976e-05
ENSG00000127585	FBXL16	-4.12485	5.18e-09	3.76e-07								ENSG00000172375	C2CD2L	-1.94691	4.24292e-14	2.82349e-12		ENSG00000115091	ACTR3	-0.915522	1.43267e-06	9.67137e-05
ENSG00000118515	SGK1	-2.05815	5.27e-09	3.81e-07								ENSG00000144136	SLC20A1	-2.38035	4.26648e-14	2.82682e-12		ENSG00000121039	RDH10	-1.49317	1.43486e-06	9.67137e-05
ENSG00000105339	DENND3	-2.31078	5.52e-09	3.97e-07								ENSG00000126458	RRAS	-2.10539	5.12345e-14	3.37992e-12		ENSG00000242247	ARFGAP3	-1.15263	1.43588e-06	9.67137e-05
ENSG00000163638	ADAMTS9	-3.58885	5.7e-09	4.08e-07								ENSG00000104738	MCM4	1.64464	5.37512e-14	3.53067e-12		ENSG00000066084	DIP2B	-0.829573	1.45155e-06	9.73477e-05
ENSG00000047365	ARAP2	-1.23958	5.82e-09	4.15e-07								ENSG00000140564	FURIN	-1.56667	5.47144e-14	3.57851e-12		ENSG00000185022	MAFF	-1.32701	1.46132e-06	9.75824e-05
ENSG00000140941	MAP1LC3B	-1.30144	6.16e-09	4.37e-07								ENSG00000174718	KIAA1551	-1.82072	5.78705e-14	3.76876e-12		ENSG00000134278	SPIRE1	-1.24395	1.47396e-06	9.8006e-05
ENSG00000169908	TM4SF1	-2.47579	6.22e-09	4.4e-07								ENSG00000151715	TMEM45B	-1.72338	6.07686e-14	3.94065e-12		ENSG00000105339	DENND3	-2.03631	1.55176e-06	0.00010274
ENSG00000214207	KRT18P10	-2.07534	6.31e-09	4.45e-07								ENSG00000196937	FAM3C	-2.00797	6.28839e-14	4.06054e-12		ENSG00000083937	CHMP2B	-1.24187	1.66963e-06	0.000110075
ENSG00000258947	TUBB3	-2.93057	6.72e-09	4.71e-07								ENSG00000051108	HERPUD1	-1.76439	6.77182e-14	4.35425e-12		ENSG00000106258	CYP3A5	-2.06122	1.71944e-06	0.000112881
ENSG00000058668	ATP2B4	-2.20197	6.82e-09	4.76e-07								ENSG00000112033	PPARD	-1.88921	6.90571e-14	4.42168e-12		ENSG00000027697	IFNGR1	-1.14117	1.72811e-06	0.000112973
ENSG00000189334	S100A14	-2.64985	6.94e-09	4.83e-07								ENSG00000107960	OBFC1	-1.86776	7.7257e-14	4.92602e-12		ENSG00000228903	RASA4CP	-4.52896	1.75664e-06	0.000114358
ENSG00000138166	DUSP5	-5.43709	7.04e-09	4.87e-07								ENSG00000107863	ARHGAP21	-1.1962	8.0343e-14	5.10144e-12		ENSG00000107863	ARHGAP21	-0.759921	1.78862e-06	0.000115955
ENSG00000027697	IFNGR1	-1.08627	7.68e-09	5.28e-07								ENSG00000130164	LDLR	-2.13433	8.39546e-14	5.30864e-12		ENSG00000112769	LAMA4	-4.42847	1.81574e-06	0.000117225
ENSG00000162241	SLC25A45	-2.65962	7.67e-09	5.28e-07								ENSG00000136830	FAM129B	-1.34895	8.459e-14	5.32672e-12		ENSG00000174136	RGMB	1.13716	1.82546e-06	0.000117365
ENSG00000214595	EML6	-2.15461	8.06e-09	5.51e-07								ENSG00000105971	CAV2	-4.20913	9.20413e-14	5.77209e-12		ENSG00000214595	EML6	-2.16109	1.83785e-06	0.000117675
ENSG00000142867	BCL10	-1.12987	8.13e-09	5.51e-07								ENSG00000054179	ENTPD2	-2.79793	9.51318e-14	5.94145e-12		ENSG00000145349	CAMK2D	-1.07804	1.88223e-06	0.000120023
ENSG00000179388	EGR3	-5.71666	8.09e-09	5.51e-07								ENSG00000118513	MYB	1.4648	1.14332e-13	7.11145e-12		ENSG00000131620	ANO1	-3.81405	1.92142e-06	0.000122022
ENSG00000144136	SLC20A1	-1.52103	8.35e-09	5.64e-07								ENSG00000215807	KRT18P65	-3.1779	1.32686e-13	8.2195e-12		ENSG00000118922	KLF12	-3.80317	1.96372e-06	0.000123698
ENSG00000003402	CFLAR	-1.43342	8.41e-09	5.66e-07								ENSG00000186862	PDZD7	-1.7658	1.41272e-13	8.71597e-12		ENSG00000131016	AKAP12	-5.20923	1.96112e-06	0.000123698
ENSG00000021355	SERPINB1	-1.08808	8.61e-09	5.77e-07								ENSG00000084733	RAB10	-1.62767	1.45478e-13	8.93928e-12		ENSG00000123636	BAZ2B	-1.70687	2.13815e-06	0.000133896
ENSG00000073737	DHRS9	-7.07716	8.81e-09	5.88e-07								ENSG00000057657	PRDM1	-3.60638	1.53861e-13	9.41641e-12		ENSG00000214207	KRT18P10	-1.99092	2.14282e-06	0.000133896
ENSG00000124116	WFDC3	-5.17563	8.95e-09	5.92e-07								ENSG00000170542	SERPINB9	-1.58737	1.6771e-13	1.02229e-11		ENSG00000182247	UBE2E2	-2.13996	2.15207e-06	0.000133936
ENSG00000137267	TUBB2A	-2.06111	8.92e-09	5.92e-07								ENSG00000066084	DIP2B	-1.27952	1.79385e-13	1.0891e-11		ENSG00000135828	RNASEL	-1.59939	2.16867e-06	0.000134432
ENSG00000131725	WDR44	-0.75065	9.08e-09	5.99e-07								ENSG00000130479	MAP1S	-1.60107	1.87335e-13	1.13286e-11		ENSG00000001617	SEMA3F	-1.28712	2.18221e-06	0.000134602
ENSG00000198959	TGM2	-1.77656	9.32e-09	6.12e-07								ENSG00000253219	KRT18P41	-3.13716	2.08835e-13	1.25788e-11		ENSG00000076928	ARHGEF1	-1.18434	2.18873e-06	0.000134602
ENSG00000225339	RP11-513I15.6	-4.08725	1.02e-08	6.67e-07								ENSG00000166333	ILK	-1.40789	2.17222e-13	1.30325e-11		ENSG00000169994	MYO7B	-1.22185	2.20034e-06	0.000134784
ENSG00000149218	ENDOD1	-1.09996	1.04e-08	6.75e-07								ENSG00000146648	EGFR	-1.64797	2.32368e-13	1.38865e-11		ENSG00000106366	SERPINE1	-2.71453	2.29183e-06	0.000139468
ENSG00000198814	GK	-1.8016	1.05e-08	6.83e-07								ENSG00000136143	SUCLA2	-1.35598	2.38788e-13	1.42144e-11		ENSG00000166446	CDYL2	-2.04115	2.29473e-06	0.000139468
ENSG00000137364	TPMT	-1.54444	1.06e-08	6.87e-07								ENSG00000235314	LINC00957	-3.2238	2.51925e-13	1.49381e-11		ENSG00000078804	TP53INP2	-2.90341	2.34078e-06	0.000141163
ENSG00000115648	MLPH	-2.81629	1.12e-08	7.19e-07								ENSG00000091622	PITPNM3	-2.87539	2.65096e-13	1.56581e-11		ENSG00000092820	EZR	-0.966537	2.33262e-06	0.000141163
ENSG00000197956	S100A6	-1.43058	1.15e-08	7.41e-07								ENSG00000203799	CCDC162P	-3.24704	2.75383e-13	1.6203e-11		ENSG00000123684	LPGAT1	-0.988316	2.39893e-06	0.000144112
ENSG00000178462	TUBAL3	-2.41751	1.24e-08	7.91e-07								ENSG00000169213	RAB3B	-3.42052	2.8787e-13	1.68725e-11		ENSG00000089199	CHGB	-2.27475	2.53209e-06	0.000151526
ENSG00000160408	ST6GALNAC6	-1.68116	1.33e-08	8.47e-07								ENSG00000013364	MVP	-2.28478	3.09103e-13	1.79787e-11		ENSG00000175197	DDIT3	-1.09669	2.57678e-06	0.00015361
ENSG00000125753	VASP	-1.28876	1.34e-08	8.52e-07								ENSG00000118276	B4GALT6	-2.98688	3.08122e-13	1.79787e-11		ENSG00000123405	NFE2	2.45212	2.60349e-06	0.000154609
ENSG00000203799	CCDC162P	-2.56397	1.36e-08	8.59e-07								ENSG00000169994	MYO7B	-1.88039	3.26528e-13	1.892e-11		ENSG00000132470	ITGB4	-1.31595	2.62539e-06	0.000155317
ENSG00000197142	ACSL5	-1.76534	1.37e-08	8.63e-07								ENSG00000100116	GCAT	-1.63542	3.75255e-13	2.1661e-11		ENSG00000105355	PLIN3	-1.23691	2.80705e-06	0.000165435
ENSG00000151715	TMEM45B	-1.18739	1.4e-08	8.76e-07								ENSG00000198901	PRC1	1.71572	3.86212e-13	2.22094e-11		ENSG00000161547	SRSF2	0.850436	2.84432e-06	0.000166999
ENSG00000204610	TRIM15	-1.40371	1.48e-08	9.26e-07								ENSG00000101311	FERMT1	-2.04051	3.97063e-13	2.27475e-11		ENSG00000185761	ADAMTSL5	-1.56404	2.91238e-06	0.000170352
ENSG00000115525	ST3GAL5	-1.56728	1.52e-08	9.48e-07								ENSG00000101844	ATG4A	-1.77861	4.02184e-13	2.29546e-11		ENSG00000254285	KRT8P3	-1.68754	3.04447e-06	0.000177412
ENSG00000042493	CAPG	-1.77383	1.53e-08	9.51e-07								ENSG00000088367	EPB41L1	-2.24214	4.05404e-13	2.3052e-11
ENSG00000118816	CCNI	-0.55753	1.56e-08	9.65e-07								ENSG00000214595	EML6	-3.15211	4.0901e-13	2.31707e-11
ENSG00000171988	JMJD1C	-0.954631	1.59e-08	9.81e-07								ENSG00000181649	PHLDA2	-2.83866	4.37189e-13	2.46753e-11
ENSG00000088826	SMOX	-1.241	1.6e-08	9.82e-07								ENSG00000159433	STARD9	2.12695	4.39812e-13	2.47317e-11
ENSG00000136802	LRRC8A	-1.48812	1.61e-08	9.82e-07								ENSG00000165480	SKA3	1.45729	4.42397e-13	2.47856e-11
ENSG00000134668	SPOCD1	-4.21115	1.62e-08	9.83e-07								ENSG00000001617	SEMA3F	-1.97101	4.62627e-13	2.57499e-11
ENSG00000175463	TBC1D10C	-4.3781	1.65e-08	1e-06								ENSG00000090097	PCBP4	-1.64136	4.62987e-13	2.57499e-11
ENSG00000152503	TRIM36	-2.1436	1.67e-08	1.01e-06								ENSG00000110492	MDK	-1.90109	4.6665e-13	2.58592e-11
ENSG00000196611	MMP1	-8.07342	1.71e-08	1.03e-06								ENSG00000155366	RHOC	-2.17194	4.87716e-13	2.69286e-11
ENSG00000130449	ZSWIM6	-0.862823	1.74e-08	1.04e-06								ENSG00000176974	SHMT1	1.81652	5.40821e-13	2.9753e-11
ENSG00000089639	GMIP	-0.742562	1.75e-08	1.05e-06								ENSG00000142627	EPHA2	-2.38517	5.5602e-13	3.04791e-11
ENSG00000066322	ELOVL1	-1.32523	1.77e-08	1.05e-06								ENSG00000157456	CCNB2	1.83918	5.83919e-13	3.18937e-11
ENSG00000172965	MIR4435-1HG	-1.25562	1.77e-08	1.05e-06								ENSG00000100036	SLC35E4	-2.74113	6.545e-13	3.56212e-11
ENSG00000173166	RAPH1	-1.67506	1.77e-08	1.05e-06								ENSG00000168679	SLC16A4	-4.04138	6.66063e-13	3.61215e-11
ENSG00000179104	TMTC2	-1.33765	1.81e-08	1.06e-06								ENSG00000166510	CCDC68	-3.18436	7.22724e-13	3.90553e-11
ENSG00000109756	RAPGEF2	-0.631381	1.82e-08	1.07e-06								ENSG00000151718	WWC2	-3.63301	7.53336e-13	4.05657e-11
ENSG00000213406	ANXA2P1	-2.14467	1.87e-08	1.09e-06								ENSG00000143344	RGL1	-2.40349	7.77217e-13	4.17042e-11
ENSG00000057704	TMCC3	-2.01716	1.91e-08	1.11e-06								ENSG00000132470	ITGB4	-2.00915	7.813e-13	4.17763e-11
ENSG00000176170	SPHK1	-2.66723	1.99e-08	1.16e-06								ENSG00000160712	IL6R	-5.76738	9.22467e-13	4.9152e-11
ENSG00000112782	CLIC5	-3.07017	2.04e-08	1.18e-06								ENSG00000048342	CC2D2A	2.48027	9.37619e-13	4.9718e-11
ENSG00000166311	SMPD1	-1.50625	2.09e-08	1.21e-06								ENSG00000163874	ZC3H12A	-1.77503	9.39615e-13	4.9718e-11
ENSG00000013364	MVP	-1.61627	2.12e-08	1.22e-06								ENSG00000255112	CHMP1B	-1.32506	9.45484e-13	4.98555e-11
ENSG00000174021	GNG5	-0.955915	2.2e-08	1.26e-06								ENSG00000163898	LIPH	-3.48076	1.02119e-12	5.36616e-11
ENSG00000130821	SLC6A8	-3.09118	2.25e-08	1.28e-06								ENSG00000115616	SLC9A2	-3.59765	1.02572e-12	5.37145e-11
ENSG00000165474	GJB2	-1.66552	2.37e-08	1.35e-06								ENSG00000147041	SYTL5	-4.18381	1.03665e-12	5.41011e-11
ENSG00000176903	PNMA1	-1.37872	2.39e-08	1.36e-06								ENSG00000157227	MMP14	-2.18126	1.34677e-12	7.00459e-11
ENSG00000146648	EGFR	-1.03887	2.77e-08	1.56e-06								ENSG00000205356	TECPR1	-1.46649	1.5935e-12	8.25966e-11
ENSG00000101236	RNF24	-1.14334	2.8e-08	1.57e-06								ENSG00000129657	SEC14L1	-2.10393	1.64195e-12	8.4819e-11
ENSG00000121039	RDH10	-1.5251	2.8e-08	1.57e-06								ENSG00000137825	ITPKA	-1.64736	1.67259e-12	8.61103e-11
ENSG00000160588	MPZL3	-1.63972	2.8e-08	1.57e-06								ENSG00000196352	CD55	-6.39596	1.7572e-12	9.01616e-11
ENSG00000115221	ITGB6	-1.55688	2.83e-08	1.58e-06								ENSG00000146112	PPP1R18	-2.46578	2.06402e-12	1.05549e-10
ENSG00000072364	AFF4	-1.01271	2.86e-08	1.59e-06								ENSG00000100422	CERK	-2.63399	2.09955e-12	1.06765e-10
ENSG00000113742	CPEB4	-1.22571	2.91e-08	1.61e-06								ENSG00000110046	ATG2A	-1.45844	2.1018e-12	1.06765e-10
ENSG00000005884	ITGA3	-1.88596	2.93e-08	1.62e-06								ENSG00000115091	ACTR3	-1.34525	2.20126e-12	1.11445e-10
ENSG00000139173	TMEM117	-0.87034	3.07e-08	1.69e-06								ENSG00000213943	KRT18P17	-3.16665	2.28023e-12	1.15061e-10
ENSG00000137275	RIPK1	-0.538218	3.11e-08	1.7e-06								ENSG00000133135	RNF128	-1.2696	2.3464e-12	1.18009e-10
ENSG00000196700	ZNF512B	-1.34311	3.12e-08	1.7e-06								ENSG00000007384	RHBDF1	-2.2031	2.36103e-12	1.18354e-10
ENSG00000107738	C10orf54	-2.75983	3.16e-08	1.72e-06								ENSG00000135074	ADAM19	-2.51265	2.45965e-12	1.22894e-10
ENSG00000186577	C6orf1	-1.26312	3.18e-08	1.73e-06								ENSG00000116191	RALGPS2	-1.72223	2.7383e-12	1.36369e-10
ENSG00000066230	SLC9A3	-1.77441	3.32e-08	1.79e-06								ENSG00000183598	HIST2H3D	1.96786	2.97404e-12	1.47627e-10
ENSG00000140022	STON2	-1.3894	3.34e-08	1.8e-06								ENSG00000048471	SNX29	-2.08056	3.03893e-12	1.50358e-10
ENSG00000213943	KRT18P17	-2.05848	3.45e-08	1.86e-06								ENSG00000171206	TRIM8	-1.93916	3.10548e-12	1.53153e-10
ENSG00000239305	RNF103	-1.12852	3.46e-08	1.86e-06								ENSG00000260807	RP11-161M6.2	-3.84744	3.11867e-12	1.53308e-10
ENSG00000140950	TLDC1	-1.33795	3.49e-08	1.86e-06								ENSG00000099625	C19orf26	-2.73467	3.13448e-12	1.5359e-10
ENSG00000214176	PLEKHM1P	-1.67176	3.5e-08	1.86e-06								ENSG00000030110	BAK1	-1.45571	3.34111e-12	1.63189e-10
ENSG00000110628	SLC22A18	-1.39567	3.55e-08	1.88e-06								ENSG00000173166	RAPH1	-2.39598	3.50548e-12	1.70671e-10
ENSG00000154447	SH3RF1	-1.04391	3.64e-08	1.92e-06								ENSG00000076928	ARHGEF1	-1.73538	3.70266e-12	1.79697e-10
ENSG00000115084	SLC35F5	-0.972169	3.91e-08	2.06e-06								ENSG00000153071	DAB2	-1.85172	3.9974e-12	1.93385e-10
ENSG00000237202	AJ239321.3	-3.54169	3.96e-08	2.08e-06								ENSG00000101608	MYL12A	-1.13725	4.48214e-12	2.1615e-10
ENSG00000159267	HLCS	-1.14404	4.11e-08	2.16e-06								ENSG00000162852	CNST	-1.18438	4.61912e-12	2.22053e-10
ENSG00000205899	BHLHA9	-3.49111	4.12e-08	2.16e-06								ENSG00000149554	CHEK1	1.41759	5.01795e-12	2.40467e-10
ENSG00000165092	ALDH1A1	0.934657	4.17e-08	2.17e-06								ENSG00000166446	CDYL2	-2.91105	5.33001e-12	2.54621e-10
ENSG00000142733	MAP3K6	-1.9342	4.19e-08	2.18e-06								ENSG00000155189	AGPAT5	-1.86223	5.82584e-12	2.77438e-10
ENSG00000182372	CLN8	-0.722284	4.26e-08	2.2e-06								ENSG00000089159	PXN	-1.58892	5.86879e-12	2.78612e-10
ENSG00000152413	HOMER1	-1.17491	4.28e-08	2.21e-06								ENSG00000012822	CALCOCO1	-3.12471	5.92617e-12	2.80462e-10
ENSG00000144118	RALB	-1.07916	4.39e-08	2.26e-06								ENSG00000115525	ST3GAL5	-2.21132	5.97054e-12	2.81688e-10
ENSG00000089159	PXN	-1.07365	4.52e-08	2.32e-06								ENSG00000065613	SLK	-1.51784	6.01024e-12	2.82685e-10
ENSG00000162594	IL23R	-2.80411	4.55e-08	2.33e-06								ENSG00000116584	ARHGEF2	-1.47562	6.35615e-12	2.98035e-10
ENSG00000103742	IGDCC4	-2.16931	4.58e-08	2.33e-06								ENSG00000114423	CBLB	-1.54131	6.53368e-12	3.05419e-10
ENSG00000184792	OSBP2	-1.56153	4.57e-08	2.33e-06								ENSG00000111206	FOXM1	1.83386	6.55655e-12	3.05551e-10
ENSG00000118200	CAMSAP2	-0.756357	4.72e-08	2.39e-06								ENSG00000125753	VASP	-1.84572	6.68197e-12	3.10447e-10
ENSG00000025772	TOMM34	-1.20492	4.76e-08	2.4e-06								ENSG00000103089	FA2H	-1.83359	7.15274e-12	3.31309e-10
ENSG00000008513	ST3GAL1	-5.20856	5.06e-08	2.55e-06								ENSG00000147889	CDKN2A	-3.22356	7.69677e-12	3.55427e-10
ENSG00000187583	PLEKHN1	-2.77203	5.13e-08	2.57e-06								ENSG00000068489	PRR11	2.05553	7.96185e-12	3.66558e-10
ENSG00000104361	NIPAL2	-1.1975	5.31e-08	2.66e-06								ENSG00000249898	CTD-2541M15.1	-3.37974	8.04234e-12	3.69148e-10
ENSG00000117394	SLC2A1	-1.22331	5.34e-08	2.67e-06								ENSG00000112782	CLIC5	-4.2755	8.14793e-12	3.72872e-10
ENSG00000050405	LIMA1	-1.23071	5.36e-08	2.67e-06								ENSG00000089685	BIRC5	1.84665	8.2032e-12	3.74277e-10
ENSG00000169994	MYO7B	-1.23202	5.46e-08	2.71e-06								ENSG00000103966	EHD4	-1.75531	8.61913e-12	3.92081e-10
ENSG00000054793	ATP9A	-0.887852	5.98e-08	2.94e-06								ENSG00000136560	TANK	-1.24217	9.33612e-12	4.23432e-10
ENSG00000140526	ABHD2	-1.13696	5.98e-08	2.94e-06								ENSG00000204128	C2orf72	2.11793	1.07059e-11	4.84118e-10
ENSG00000165169	DYNLT3	-1.64881	5.96e-08	2.94e-06								ENSG00000204282	TNRC6C-AS1	-3.65232	1.1272e-11	5.08208e-10
ENSG00000120306	CYSTM1	-1.44733	6.06e-08	2.96e-06								ENSG00000113742	CPEB4	-1.85207	1.24746e-11	5.60767e-10
ENSG00000139318	DUSP6	-1.8556	6.05e-08	2.96e-06								ENSG00000184731	FAM110C	-2.32697	1.26121e-11	5.65283e-10
ENSG00000186862	PDZD7	-1.16778	6.16e-08	3e-06								ENSG00000067082	KLF6	-3.23082	1.29351e-11	5.78059e-10
ENSG00000051108	HERPUD1	-1.12078	6.31e-08	3.07e-06								ENSG00000100162	CENPM	1.88172	1.30155e-11	5.79949e-10
ENSG00000130513	GDF15	-1.71439	6.49e-08	3.14e-06								ENSG00000140525	FANCI	1.37576	1.39497e-11	6.19765e-10
ENSG00000124225	PMEPA1	-2.54823	6.53e-08	3.16e-06								ENSG00000027697	IFNGR1	-1.61544	1.40094e-11	6.2061e-10
ENSG00000107338	SHB	-1.14924	6.59e-08	3.16e-06								ENSG00000131016	AKAP12	-7.39172	1.42156e-11	6.27916e-10
ENSG00000234745	HLA-B	-1.47172	6.57e-08	3.16e-06								ENSG00000188910	GJB3	-6.44894	1.56244e-11	6.88151e-10
ENSG00000184731	FAM110C	-1.53982	6.71e-08	3.21e-06								ENSG00000107738	C10orf54	-3.59311	1.68601e-11	7.40436e-10
ENSG00000173267	SNCG	-3.30995	6.75e-08	3.22e-06								ENSG00000072364	AFF4	-1.4587	1.75842e-11	7.70018e-10
ENSG00000088367	EPB41L1	-1.54329	6.99e-08	3.31e-06								ENSG00000027075	PRKCH	-1.74438	1.91958e-11	8.38181e-10
ENSG00000204540	PSORS1C1	-2.00539	6.99e-08	3.31e-06								ENSG00000186577	C6orf1	-1.91449	1.98933e-11	8.66154e-10
ENSG00000234737	KRT18P15	-1.91757	6.97e-08	3.31e-06								ENSG00000213771	KRT8P37	-3.04153	2.01573e-11	8.75149e-10
ENSG00000142627	EPHA2	-1.53126	7.02e-08	3.31e-06								ENSG00000168056	LTBP3	-2.02278	2.11166e-11	9.14191e-10
ENSG00000128422	KRT17	-6.24561	7.25e-08	3.41e-06								ENSG00000197324	LRP10	-1.95804	2.41936e-11	1.04444e-09
ENSG00000100003	SEC14L2	-2.1802	7.46e-08	3.5e-06								ENSG00000166851	PLK1	1.7407	2.45461e-11	1.05666e-09
ENSG00000147041	SYTL5	-3.3184	7.72e-08	3.61e-06								ENSG00000090006	LTBP4	-2.91759	2.47263e-11	1.05844e-09
ENSG00000184292	TACSTD2	-2.9297	7.74e-08	3.61e-06								ENSG00000135596	MICAL1	-2.20292	2.47002e-11	1.05844e-09
ENSG00000155252	PI4K2A	-0.805617	7.78e-08	3.62e-06								ENSG00000102048	ASB9	1.97364	2.56854e-11	1.09641e-09
ENSG00000070159	PTPN3	-1.1833	7.93e-08	3.68e-06								ENSG00000135046	ANXA1	-6.22668	2.61972e-11	1.11514e-09
ENSG00000006453	BAIAP2L1	-1.09476	8.13e-08	3.76e-06								ENSG00000147642	SYBU	1.6978	2.74294e-11	1.16433e-09
ENSG00000163235	TGFA	-1.13864	8.27e-08	3.82e-06								ENSG00000131067	GGT7	-1.96857	3.03569e-11	1.28502e-09
ENSG00000126458	RRAS	-1.45669	8.4e-08	3.87e-06								ENSG00000221968	FADS3	-2.44365	3.10018e-11	1.30869e-09
ENSG00000063660	GPC1	-3.95507	8.52e-08	3.91e-06								ENSG00000228666	KRT18P1	-3.15646	3.52468e-11	1.48377e-09
ENSG00000232803	RP11-93B14.5	-4.38345	8.72e-08	3.99e-06								ENSG00000124882	EREG	-3.52832	3.70102e-11	1.55372e-09
ENSG00000173846	PLK3	-1.83608	9.21e-08	4.21e-06								ENSG00000167513	CDT1	1.50993	3.95201e-11	1.65453e-09
ENSG00000172375	C2CD2L	-1.23725	9.39e-08	4.28e-06								ENSG00000198648	STK39	-1.5301	4.12841e-11	1.72364e-09
ENSG00000071054	MAP4K4	-0.984463	9.45e-08	4.29e-06								ENSG00000183597	TANGO2	-1.05834	4.24995e-11	1.76954e-09
ENSG00000235314	LINC00957	-2.30647	9.46e-08	4.29e-06								ENSG00000143476	DTL	1.8603	4.39724e-11	1.82587e-09
ENSG00000228666	KRT18P1	-2.07039	1e-07	4.53e-06								ENSG00000142156	COL6A1	-3.20213	4.42529e-11	1.83253e-09
ENSG00000163395	IGFN1	-6.35152	1.02e-07	4.6e-06								ENSG00000089220	PEBP1	1.08218	4.52877e-11	1.87029e-09
ENSG00000221968	FADS3	-1.59443	1.05e-07	4.73e-06								ENSG00000085832	EPS15	-1.18667	5.02699e-11	2.07044e-09
ENSG00000162923	WDR26	-0.846485	1.06e-07	4.75e-06								ENSG00000090889	KIF4A	1.69088	5.29645e-11	2.17554e-09
ENSG00000091622	PITPNM3	-1.87345	1.06e-07	4.76e-06								ENSG00000214176	PLEKHM1P	-2.50343	5.32557e-11	2.18162e-09
ENSG00000135596	MICAL1	-1.40126	1.09e-07	4.84e-06								ENSG00000186318	BACE1	2.05694	5.63709e-11	2.30305e-09
ENSG00000102760	RGCC	-2.16851	1.14e-07	5.08e-06								ENSG00000170537	TMC7	-2.98764	5.71168e-11	2.32589e-09
ENSG00000007384	RHBDF1	-1.41579	1.16e-07	5.16e-06								ENSG00000197142	ACSL5	-2.5221	5.72353e-11	2.32589e-09
ENSG00000169692	AGPAT2	-1.21076	1.26e-07	5.55e-06								ENSG00000115648	MLPH	-3.77296	6.17476e-11	2.50258e-09
ENSG00000169213	RAB3B	-2.5035	1.28e-07	5.66e-06								ENSG00000101782	RIOK3	-1.33391	6.37487e-11	2.57683e-09
ENSG00000185507	IRF7	-1.64953	1.29e-07	5.69e-06								ENSG00000160408	ST6GALNAC6	-2.46435	6.6814e-11	2.6936e-09
ENSG00000112033	PPARD	-1.16502	1.31e-07	5.73e-06								ENSG00000160888	IER2	-1.9536	7.54764e-11	3.03479e-09
ENSG00000167723	TRPV3	-1.9803	1.31e-07	5.73e-06								ENSG00000107338	SHB	-1.80024	7.95919e-11	3.19184e-09
ENSG00000088002	SULT2B1	-3.99989	1.32e-07	5.74e-06								ENSG00000174021	GNG5	-1.46208	8.09257e-11	3.23682e-09
ENSG00000104892	KLC3	-3.6599	1.38e-07	5.98e-06								ENSG00000182606	TRAK1	-1.262	8.14118e-11	3.24773e-09
ENSG00000172594	SMPDL3A	-1.87765	1.38e-07	5.98e-06								ENSG00000156398	SFXN2	1.26229	8.90721e-11	3.54405e-09
ENSG00000184557	SOCS3	-5.94044	1.39e-07	6.01e-06								ENSG00000198752	CDC42BPB	-1.57414	9.00897e-11	3.5752e-09
ENSG00000228705	LINC00659	-4.93236	1.41e-07	6.08e-06								ENSG00000058668	ATP2B4	-2.98362	9.74659e-11	3.85788e-09
ENSG00000147459	DOCK5	-0.77753	1.41e-07	6.09e-06								ENSG00000005238	FAM214B	-2.85224	1.00211e-10	3.95625e-09
ENSG00000215807	KRT18P65	-2.06769	1.44e-07	6.17e-06								ENSG00000107404	DVL1	-1.40255	1.02017e-10	4.01713e-09
ENSG00000106460	TMEM106B	-1.21341	1.49e-07	6.39e-06								ENSG00000160161	CILP2	-3.3845	1.04726e-10	4.11321e-09
ENSG00000068971	PPP2R5B	-1.59568	1.63e-07	6.95e-06								ENSG00000003436	TFPI	-4.28736	1.07352e-10	4.2055e-09
ENSG00000118855	MFSD1	-0.84981	1.65e-07	7.01e-06								ENSG00000100228	RAB36	-2.03979	1.10453e-10	4.31586e-09
ENSG00000184702	SEPT5	-2.5747	1.65e-07	7.01e-06								ENSG00000184916	JAG2	-2.09527	1.14089e-10	4.44656e-09
ENSG00000224520	KRT8P45	-2.05082	1.65e-07	7.01e-06								ENSG00000047365	ARAP2	-1.74378	1.1623e-10	4.51845e-09
ENSG00000102699	PARP4	-0.57571	1.67e-07	7.07e-06								ENSG00000035499	DEPDC1B	1.87402	1.30696e-10	5.06788e-09
ENSG00000156671	SAMD8	-1.00142	1.71e-07	7.23e-06								ENSG00000241186	TDGF1	2.17475	1.31592e-10	5.08967e-09
ENSG00000074370	ATP2A3	-1.19068	1.75e-07	7.35e-06								ENSG00000140859	KIFC3	-2.18428	1.33278e-10	5.14185e-09
ENSG00000003436	TFPI	-3.38583	1.77e-07	7.41e-06								ENSG00000114529	C3orf52	-1.80491	1.36519e-10	5.25356e-09
ENSG00000151376	ME3	0.721771	1.82e-07	7.59e-06								ENSG00000117724	CENPF	1.89289	1.38435e-10	5.31388e-09
ENSG00000204228	HSD17B8	0.775527	1.82e-07	7.59e-06								ENSG00000101109	STK4	-1.26743	1.39508e-10	5.34161e-09
ENSG00000138678	AGPAT9	-2.83648	1.83e-07	7.62e-06								ENSG00000185222	WBP5	-1.39903	1.41902e-10	5.40613e-09
ENSG00000001617	SEMA3F	-1.31853	1.87e-07	7.75e-06								ENSG00000186174	BCL9L	-1.49212	1.41598e-10	5.40613e-09
ENSG00000163110	PDLIM5	-0.749446	1.87e-07	7.75e-06								ENSG00000134278	SPIRE1	-1.65845	1.4737e-10	5.60041e-09
ENSG00000198900	TOP1	-1.1878	1.89e-07	7.83e-06								ENSG00000169641	LUZP1	-1.46796	1.47963e-10	5.60897e-09
ENSG00000005238	FAM214B	-2.00924	1.92e-07	7.92e-06								ENSG00000113758	DBN1	-3.02867	1.53135e-10	5.79061e-09
ENSG00000171889	MIR31HG	-4.05086	1.97e-07	8.1e-06								ENSG00000258947	TUBB3	-4.12067	1.53675e-10	5.79667e-09
ENSG00000101342	TLDC2	-1.63419	2e-07	8.22e-06								ENSG00000169692	AGPAT2	-1.76895	1.58359e-10	5.9586e-09
ENSG00000137947	GTF2B	-0.745096	2.08e-07	8.5e-06								ENSG00000173221	GLRX	-2.31923	1.61665e-10	6.06802e-09
ENSG00000100221	JOSD1	-0.989892	2.11e-07	8.6e-06								ENSG00000012048	BRCA1	1.67781	1.72157e-10	6.44594e-09
ENSG00000130164	LDLR	-1.29427	2.11e-07	8.6e-06								ENSG00000112394	SLC16A10	1.44434	1.75436e-10	6.55264e-09
ENSG00000135709	KIAA0513	-1.66709	2.14e-07	8.7e-06								ENSG00000139318	DUSP6	-2.8435	1.78546e-10	6.65246e-09
ENSG00000124097	HMGB1P1	0.944081	2.19e-07	8.86e-06								ENSG00000174136	RGMB	1.53276	1.85334e-10	6.88853e-09
ENSG00000183960	KCNH8	-1.88937	2.21e-07	8.94e-06								ENSG00000163110	PDLIM5	-1.1609	1.89266e-10	7.01759e-09
ENSG00000180263	FGD6	-1.17352	2.26e-07	9.11e-06								ENSG00000136840	ST6GALNAC4	-2.03101	1.93931e-10	7.1731e-09
ENSG00000088340	FER1L4	-3.16259	2.28e-07	9.18e-06								ENSG00000050405	LIMA1	-1.7877	1.96024e-10	7.23296e-09
ENSG00000175793	SFN	-1.52916	2.35e-07	9.41e-06								ENSG00000175197	DDIT3	-1.48098	1.9864e-10	7.31178e-09
ENSG00000130340	SNX9	-1.04381	2.4e-07	9.59e-06								ENSG00000140522	RLBP1	-3.11483	2.02416e-10	7.43281e-09
ENSG00000110925	CSRNP2	-0.728125	2.42e-07	9.65e-06								ENSG00000097033	SH3GLB1	-1.40394	2.18896e-10	8.01816e-09
ENSG00000010310	GIPR	-2.17398	2.44e-07	9.69e-06								ENSG00000179833	SERTAD2	-1.86371	2.19409e-10	8.01816e-09
ENSG00000100055	CYTH4	-3.83986	2.43e-07	9.69e-06								ENSG00000034063	UHRF1	1.32697	2.3988e-10	8.74528e-09
ENSG00000065809	FAM107B	-0.956789	2.45e-07	9.71e-06								ENSG00000198561	CTNND1	-1.0203	2.40667e-10	8.75302e-09
ENSG00000130479	MAP1S	-0.966354	2.51e-07	9.93e-06								ENSG00000198830	HMGN2	1.38628	2.48415e-10	9.01333e-09
ENSG00000197324	LRP10	-1.30528	2.55e-07	1.01e-05								ENSG00000164221	CCDC112	-1.76965	2.58724e-10	9.36505e-09
ENSG00000129566	TEP1	-0.780737	2.66e-07	1.05e-05								ENSG00000145685	LHFPL2	-1.30064	2.79088e-10	1.00782e-08
ENSG00000221926	TRIM16	-0.784911	2.67e-07	1.05e-05								ENSG00000166401	SERPINB8	-2.98335	2.82298e-10	1.01701e-08
ENSG00000171867	PRNP	-0.517385	2.73e-07	1.07e-05								ENSG00000151491	EPS8	-1.39735	2.88042e-10	1.03525e-08
ENSG00000172380	GNG12	-0.726132	2.73e-07	1.07e-05								ENSG00000232803	RP11-93B14.5	-5.68696	2.93985e-10	1.05413e-08
ENSG00000183624	HMCES	-0.39964	2.81e-07	1.1e-05								ENSG00000179361	ARID3B	-1.79177	3.09042e-10	1.10552e-08
ENSG00000138434	SSFA2	-1.16349	2.95e-07	1.15e-05								ENSG00000064932	SBNO2	-1.09882	3.11521e-10	1.11177e-08
ENSG00000036565	SLC18A1	3.09191	2.97e-07	1.15e-05								ENSG00000104880	ARHGEF18	-1.27144	3.20531e-10	1.14125e-08
ENSG00000085117	CD82	-1.49298	3.13e-07	1.21e-05								ENSG00000136002	ARHGEF4	-5.05284	3.27713e-10	1.16411e-08
ENSG00000139626	ITGB7	-2.37875	3.17e-07	1.22e-05								ENSG00000175182	FAM131A	-1.61057	3.53657e-10	1.25334e-08
ENSG00000118513	MYB	0.827013	3.18e-07	1.23e-05								ENSG00000090776	EFNB1	-1.73509	3.75489e-10	1.32763e-08
ENSG00000112378	PERP	-0.931789	3.34e-07	1.29e-05								ENSG00000178999	AURKB	1.66945	3.78635e-10	1.33565e-08
ENSG00000133048	CHI3L1	-4.5177	3.47e-07	1.33e-05								ENSG00000130513	GDF15	-2.44908	3.83237e-10	1.34876e-08
ENSG00000171608	PIK3CD	-2.04749	3.54e-07	1.35e-05								ENSG00000147168	IL2RG	-2.28647	3.88344e-10	1.36359e-08
ENSG00000121743	GJA3	-2.35577	3.59e-07	1.37e-05								ENSG00000166311	SMPD1	-2.06037	4.16623e-10	1.45952e-08
ENSG00000100994	PYGB	-0.981389	3.62e-07	1.38e-05								ENSG00000168496	FEN1	1.44893	4.24191e-10	1.48262e-08
ENSG00000166750	SLFN5	-1.21119	3.65e-07	1.39e-05								ENSG00000139636	LMBR1L	-1.48502	4.31378e-10	1.50429e-08
ENSG00000113369	ARRDC3	-1.46066	3.77e-07	1.43e-05								ENSG00000016391	CHDH	1.20633	4.34526e-10	1.51181e-08
ENSG00000158270	COLEC12	-4.11118	4.02e-07	1.52e-05								ENSG00000167325	RRM1	1.22577	4.44066e-10	1.54149e-08
ENSG00000179833	SERTAD2	-1.19558	4.06e-07	1.53e-05								ENSG00000102265	TIMP1	-2.87439	4.51397e-10	1.56337e-08
ENSG00000149260	CAPN5	-1.17293	4.08e-07	1.54e-05								ENSG00000181652	ATG9B	-3.2906	4.68598e-10	1.61927e-08
ENSG00000100311	PDGFB	-2.8319	4.12e-07	1.55e-05								ENSG00000214814	FER1L6	-6.1594	4.84834e-10	1.67158e-08
ENSG00000150457	LATS2	-0.86271	4.16e-07	1.56e-05								ENSG00000104361	NIPAL2	-1.79363	4.96299e-10	1.7034e-08
ENSG00000247844	CCAT1	-1.29434	4.2e-07	1.57e-05								ENSG00000198858	R3HDM4	-1.18992	4.95424e-10	1.7034e-08
ENSG00000263325	LA16c-325D7.1	-4.21393	4.31e-07	1.61e-05								ENSG00000174171	RP11-23P13.6	-3.48149	5.47221e-10	1.87396e-08
ENSG00000107833	NPM3	0.807472	4.64e-07	1.73e-05								ENSG00000144554	FANCD2	1.58566	5.82996e-10	1.99199e-08
ENSG00000136560	TANK	-0.796921	4.66e-07	1.73e-05								ENSG00000115084	SLC35F5	-1.35262	6.07156e-10	2.0699e-08
ENSG00000137648	TMPRSS4	-1.47733	4.7e-07	1.74e-05								ENSG00000234737	KRT18P15	-2.8551	6.09551e-10	2.07343e-08
ENSG00000168056	LTBP3	-1.29183	4.7e-07	1.74e-05								ENSG00000261116	RP3-523K23.2	-3.81359	6.1365e-10	2.08272e-08
ENSG00000106123	EPHB6	-4.3858	4.78e-07	1.77e-05								ENSG00000073711	PPP2R3A	-1.6267	6.72978e-10	2.27784e-08
ENSG00000155744	FAM126B	-1.13192	4.97e-07	1.83e-05								ENSG00000131725	WDR44	-1.12292	6.7413e-10	2.27784e-08
ENSG00000139436	GIT2	-0.44349	4.99e-07	1.83e-05								ENSG00000075624	ACTB	-1.37797	6.77451e-10	2.284e-08
ENSG00000164924	YWHAZ	-0.63728	5.23e-07	1.92e-05								ENSG00000100350	FOXRED2	1.89676	7.02114e-10	2.36192e-08
ENSG00000189171	S100A13	-1.76475	5.73e-07	2.1e-05								ENSG00000183765	CHEK2	1.22383	7.08594e-10	2.37847e-08
ENSG00000120278	PLEKHG1	-1.3367	5.81e-07	2.12e-05								ENSG00000082153	BZW1	-1.26787	7.22726e-10	2.42057e-08
ENSG00000136811	ODF2	0.706475	5.82e-07	2.12e-05								ENSG00000105963	ADAP1	-1.41442	7.82126e-10	2.61377e-08
ENSG00000169905	TOR1AIP2	-0.447639	5.81e-07	2.12e-05								ENSG00000188312	CENPP	1.81284	8.27918e-10	2.76075e-08
ENSG00000137124	ALDH1B1	0.872676	5.88e-07	2.12e-05								ENSG00000137124	ALDH1B1	1.42414	8.44099e-10	2.80857e-08
ENSG00000143702	CEP170	-0.766403	5.86e-07	2.12e-05								ENSG00000170340	B3GNT2	-1.0697	8.69698e-10	2.88743e-08
ENSG00000164951	PDP1	-0.927496	5.87e-07	2.12e-05								ENSG00000183087	GAS6	-1.37074	9.14352e-10	3.02909e-08
ENSG00000166965	RCCD1	0.697141	5.91e-07	2.13e-05								ENSG00000112312	GMNN	1.31103	9.30236e-10	3.07503e-08
ENSG00000135437	RDH5	-1.88348	5.96e-07	2.14e-05								ENSG00000140950	TLDC1	-1.82925	1.00105e-09	3.2981e-08
ENSG00000226287	TMEM191A	-1.39643	5.98e-07	2.15e-05								ENSG00000159055	MIS18A	1.25058	1.00205e-09	3.2981e-08
ENSG00000102886	GDPD3	-1.52575	6.07e-07	2.17e-05								ENSG00000148339	SLC25A25	-1.64677	1.00792e-09	3.31027e-08
ENSG00000135097	MSI1	1.41027	6.15e-07	2.2e-05								ENSG00000165169	DYNLT3	-2.1934	1.02873e-09	3.37136e-08
ENSG00000166272	WBP1L	-0.529231	6.21e-07	2.21e-05								ENSG00000196923	PDLIM7	-2.84853	1.06234e-09	3.4666e-08
ENSG00000123636	BAZ2B	-1.44176	6.24e-07	2.22e-05								ENSG00000198742	SMURF1	-1.23174	1.06169e-09	3.4666e-08
ENSG00000165097	KDM1B	-1.0122	6.24e-07	2.22e-05								ENSG00000117472	TSPAN1	-3.1176	1.09026e-09	3.55009e-08
ENSG00000101109	STK4	-0.759419	6.28e-07	2.23e-05								ENSG00000140941	MAP1LC3B	-1.71986	1.13873e-09	3.70003e-08
ENSG00000101844	ATG4A	-1.12403	6.41e-07	2.27e-05								ENSG00000204580	DDR1	-1.63189	1.15412e-09	3.74205e-08
ENSG00000145247	OCIAD2	-0.623862	6.44e-07	2.27e-05								ENSG00000075711	DLG1	-1.31702	1.17432e-09	3.79945e-08
ENSG00000128578	STRIP2	-1.2664	6.82e-07	2.4e-05								ENSG00000213923	CSNK1E	-1.14748	1.26661e-09	4.08938e-08
ENSG00000150093	ITGB1	-1.2065	6.81e-07	2.4e-05								ENSG00000198959	TGM2	-2.31862	1.26963e-09	4.09047e-08
ENSG00000173269	MMRN2	-4.69823	7.07e-07	2.48e-05								ENSG00000179104	TMTC2	-2.00735	1.31227e-09	4.21893e-08
ENSG00000103671	TRIP4	-0.879076	7.16e-07	2.5e-05								ENSG00000154447	SH3RF1	-1.54381	1.35845e-09	4.3582e-08
ENSG00000142156	COL6A1	-2.5426	7.39e-07	2.58e-05								ENSG00000102901	CENPT	-2.41249	1.41897e-09	4.53326e-08
ENSG00000156510	HKDC1	-1.10082	7.59e-07	2.64e-05								ENSG00000169429	IL8	-4.85035	1.41864e-09	4.53326e-08
ENSG00000072736	NFATC3	-0.590013	7.6e-07	2.64e-05								ENSG00000169435	RASSF6	-1.39697	1.45354e-09	4.63398e-08
ENSG00000174028	FAM3C2	-1.51933	7.66e-07	2.65e-05								ENSG00000128923	FAM63B	-1.54452	1.4653e-09	4.66173e-08
ENSG00000215089	KRT18P11	-2.08218	7.65e-07	2.65e-05								ENSG00000163072	NOSTRIN	-2.30385	1.54939e-09	4.91898e-08
ENSG00000139044	B4GALNT3	-1.59299	7.69e-07	2.66e-05								ENSG00000134057	CCNB1	1.82207	1.55262e-09	4.919e-08
ENSG00000258311	RP11-644F5.10	-2.18116	7.82e-07	2.7e-05								ENSG00000144063	MALL	-3.20826	1.57963e-09	4.9942e-08
ENSG00000213771	KRT8P37	-1.93749	7.9e-07	2.72e-05								ENSG00000128016	ZFP36	-1.86704	1.64406e-09	5.18712e-08
ENSG00000182158	CREB3L2	-0.970655	8.12e-07	2.79e-05								ENSG00000134317	GRHL1	-1.83845	1.65079e-09	5.1976e-08
ENSG00000116668	SWT1	-1.06528	8.15e-07	2.79e-05								ENSG00000141458	NPC1	-1.3041	1.68568e-09	5.2965e-08
ENSG00000132470	ITGB4	-1.30355	8.36e-07	2.85e-05								ENSG00000167748	KLK1	-3.95273	1.70173e-09	5.33595e-08
ENSG00000149798	CDC42EP2	-1.14008	8.36e-07	2.85e-05								ENSG00000167670	CHAF1A	1.43849	1.70778e-09	5.34392e-08
ENSG00000172031	EPHX4	-1.19363	8.4e-07	2.86e-05								ENSG00000171606	ZNF274	-1.16808	1.71177e-09	5.34542e-08
ENSG00000092820	EZR	-1.18543	8.59e-07	2.92e-05								ENSG00000240668	KRT8P36	-3.43276	1.76279e-09	5.49349e-08
ENSG00000186529	CYP4F3	-1.85566	8.67e-07	2.94e-05								ENSG00000256940	RP11-783K16.5	-3.30735	1.77568e-09	5.52237e-08
ENSG00000142197	DOPEY2	-0.67174	8.97e-07	3.04e-05								ENSG00000162804	SNED1	-2.66362	1.81553e-09	5.63479e-08
ENSG00000128923	FAM63B	-1.01426	9.02e-07	3.05e-05								ENSG00000117298	ECE1	-1.08972	1.8703e-09	5.79299e-08
ENSG00000114923	SLC4A3	-2.14129	9.08e-07	3.06e-05								ENSG00000184009	ACTG1	-1.62481	1.88582e-09	5.82921e-08
ENSG00000136141	LRCH1	-1.08963	9.08e-07	3.06e-05								ENSG00000021762	OSBPL5	-1.62029	1.95566e-09	6.03285e-08
ENSG00000165102	HGSNAT	-0.525968	9.32e-07	3.13e-05								ENSG00000079616	KIF22	1.48648	1.96113e-09	6.03749e-08
ENSG00000114423	CBLB	-0.923363	9.58e-07	3.21e-05								ENSG00000137804	NUSAP1	1.77795	1.96757e-09	6.04513e-08
ENSG00000008382	MPND	0.756523	9.62e-07	3.22e-05								ENSG00000112562	SMOC2	2.1831	1.97893e-09	6.06778e-08
ENSG00000074319	TSG101	-0.609753	9.7e-07	3.24e-05								ENSG00000162407	PPAP2B	1.40808	2.03117e-09	6.21545e-08
ENSG00000204371	EHMT2	0.630422	9.74e-07	3.25e-05								ENSG00000163545	NUAK2	1.91431	2.06978e-09	6.32091e-08
ENSG00000174567	GOLT1A	-1.02125	9.85e-07	3.27e-05								ENSG00000083857	FAT1	-2.05422	2.10296e-09	6.4094e-08
ENSG00000158825	CDA	-2.57033	1.01e-06	3.36e-05								ENSG00000196535	MYO18A	-1.3772	2.13142e-09	6.48316e-08
ENSG00000157227	MMP14	-1.51581	1.02e-06	3.37e-05								ENSG00000197261	C6orf141	-3.29019	2.16868e-09	6.58337e-08
ENSG00000181652	ATG9B	-2.25425	1.03e-06	3.41e-05								ENSG00000173846	PLK3	-2.70958	2.21892e-09	6.72249e-08
ENSG00000103647	CORO2B	-5.97518	1.06e-06	3.49e-05								ENSG00000109756	RAPGEF2	-0.976671	2.314e-09	6.99459e-08
ENSG00000124209	RAB22A	-0.876806	1.06e-06	3.49e-05								ENSG00000226287	TMEM191A	-2.22515	2.31791e-09	6.99459e-08
ENSG00000145390	USP53	-0.891208	1.07e-06	3.51e-05								ENSG00000155252	PI4K2A	-1.23649	2.32262e-09	6.99494e-08
ENSG00000143067	ZNF697	-1.27444	1.08e-06	3.53e-05								ENSG00000089902	RCOR1	-1.85796	2.3333e-09	7.01324e-08
ENSG00000115504	EHBP1	-0.934372	1.09e-06	3.56e-05								ENSG00000161981	SNRNP25	1.58134	2.35082e-09	7.052e-08
ENSG00000198742	SMURF1	-0.750346	1.09e-06	3.56e-05								ENSG00000143891	GALM	1.52963	2.36391e-09	7.07732e-08
ENSG00000240668	KRT8P36	-2.25167	1.1e-06	3.58e-05								ENSG00000165512	ZNF22	1.15038	2.52114e-09	7.53328e-08
ENSG00000116584	ARHGEF2	-0.918815	1.13e-06	3.68e-05								ENSG00000103742	IGDCC4	-3.05356	2.54227e-09	7.58153e-08
ENSG00000126391	FRMD8	-1.15298	1.14e-06	3.71e-05								ENSG00000149295	DRD2	2.37626	2.58752e-09	7.70141e-08
ENSG00000173221	GLRX	-1.46322	1.15e-06	3.71e-05								ENSG00000073737	DHRS9	-9.23758	2.64309e-09	7.85148e-08
ENSG00000107960	OBFC1	-1.30273	1.15e-06	3.72e-05								ENSG00000165915	SLC39A13	-1.14081	2.65369e-09	7.86761e-08
ENSG00000214193	SH3D21	-1.55419	1.16e-06	3.73e-05								ENSG00000243477	NAT6	-1.89014	2.76837e-09	8.19168e-08
ENSG00000166886	NAB2	-1.28006	1.17e-06	3.77e-05								ENSG00000105355	PLIN3	-1.57663	2.78704e-09	8.23096e-08
ENSG00000109572	CLCN3	-0.829364	1.2e-06	3.86e-05								ENSG00000167460	TPM4	-1.09566	2.82928e-09	8.33953e-08
ENSG00000253219	KRT18P41	-1.90837	1.22e-06	3.91e-05								ENSG00000185507	IRF7	-2.48765	2.94002e-09	8.64922e-08
ENSG00000186174	BCL9L	-0.946652	1.24e-06	3.95e-05								ENSG00000070731	ST6GALNAC2	-3.78804	2.98841e-09	8.77465e-08
ENSG00000119333	WDR34	0.708804	1.27e-06	4.06e-05								ENSG00000104889	RNASEH2A	1.55997	3.05049e-09	8.9397e-08
ENSG00000090776	EFNB1	-1.13824	1.29e-06	4.12e-05								ENSG00000228903	RASA4CP	-5.6108	3.15367e-09	9.22432e-08
ENSG00000106384	MOGAT3	-1.26184	1.31e-06	4.16e-05								ENSG00000158470	B4GALT5	-1.30125	3.19473e-09	9.32653e-08
ENSG00000107819	SFXN3	-1.16896	1.32e-06	4.2e-05								ENSG00000112414	GPR126	-2.05585	3.20534e-09	9.33961e-08
ENSG00000173530	TNFRSF10D	-1.02674	1.36e-06	4.32e-05								ENSG00000085978	ATG16L1	-1.59204	3.34088e-09	9.71598e-08
ENSG00000176855	KRT18P28	-2.09431	1.36e-06	4.32e-05								ENSG00000164924	YWHAZ	-1.01587	3.39814e-09	9.86367e-08
ENSG00000146477	SLC22A3	-3.36418	1.39e-06	4.38e-05								ENSG00000099860	GADD45B	-1.7747	3.41657e-09	9.8983e-08
ENSG00000010818	HIVEP2	-0.895975	1.42e-06	4.46e-05								ENSG00000149798	CDC42EP2	-1.80599	3.61189e-09	1.04443e-07
ENSG00000134193	REG4	-3.81286	1.44e-06	4.54e-05								ENSG00000146072	TNFRSF21	-1.50596	3.71556e-09	1.07238e-07
ENSG00000168564	CDKN2AIP	-0.618641	1.46e-06	4.6e-05								ENSG00000122952	ZWINT	1.53999	3.82068e-09	1.10063e-07
ENSG00000116455	WDR77	0.53173	1.5e-06	4.69e-05								ENSG00000117525	F3	-1.72921	4.02445e-09	1.15714e-07
ENSG00000136143	SUCLA2	-0.856044	1.55e-06	4.86e-05								ENSG00000115009	CCL20	-2.42652	4.05522e-09	1.1638e-07
ENSG00000100422	CERK	-1.69627	1.57e-06	4.89e-05								ENSG00000259230	CTD-2555C10.3	-4.51819	4.23533e-09	1.2132e-07
ENSG00000156639	ZFAND3	-0.574847	1.57e-06	4.89e-05								ENSG00000146670	CDCA5	1.43254	4.46922e-09	1.27779e-07
ENSG00000115641	FHL2	-0.950019	1.59e-06	4.94e-05								ENSG00000021300	PLEKHB1	2.06903	4.52792e-09	1.29215e-07
ENSG00000196998	WDR45	-0.96088	1.62e-06	5.02e-05								ENSG00000106003	LFNG	-1.54452	4.59091e-09	1.30524e-07
ENSG00000077238	IL4R	-1.08858	1.62e-06	5.03e-05								ENSG00000257743	RP11-1220K2.2	1.94296	4.58257e-09	1.30524e-07
ENSG00000103034	NDRG4	-1.74854	1.64e-06	5.07e-05								ENSG00000214193	SH3D21	-2.45201	4.64735e-09	1.31883e-07
ENSG00000134278	SPIRE1	-1.12425	1.65e-06	5.07e-05								ENSG00000166508	MCM7	1.20751	4.70857e-09	1.33372e-07
ENSG00000145780	FEM1C	-1.06323	1.64e-06	5.07e-05								ENSG00000074319	TSG101	-0.899858	4.72653e-09	1.33632e-07
ENSG00000250221	KRT8P32	-1.68697	1.65e-06	5.07e-05								ENSG00000143669	LYST	-2.55567	4.74537e-09	1.33916e-07
ENSG00000235884	LINC00941	-2.53588	1.65e-06	5.08e-05								ENSG00000091651	ORC6	1.1886	4.92623e-09	1.38763e-07
ENSG00000183386	FHL3	-1.21406	1.67e-06	5.13e-05								ENSG00000106460	TMEM106B	-1.79614	5.03018e-09	1.41169e-07
ENSG00000255112	CHMP1B	-0.860158	1.68e-06	5.13e-05								ENSG00000186205	MARC1	1.57722	5.02471e-09	1.41169e-07
ENSG00000118898	PPL	-1.42484	1.73e-06	5.29e-05								ENSG00000092470	WDR76	1.57413	5.05618e-09	1.41638e-07
ENSG00000109452	INPP4B	-1.52938	1.74e-06	5.31e-05								ENSG00000184292	TACSTD2	-4.05746	5.49092e-09	1.53534e-07
ENSG00000138386	NAB1	-0.612672	1.82e-06	5.53e-05								ENSG00000083937	CHMP2B	-1.51514	5.51751e-09	1.53713e-07
ENSG00000140564	FURIN	-0.960586	1.82e-06	5.53e-05								ENSG00000107819	SFXN3	-1.80711	5.51708e-09	1.53713e-07
ENSG00000035403	VCL	-0.520884	1.83e-06	5.55e-05								ENSG00000111445	RFC5	1.20643	5.56223e-09	1.54677e-07
ENSG00000099860	GADD45B	-1.23536	1.83e-06	5.55e-05								ENSG00000132824	SERINC3	-0.976505	5.60981e-09	1.55716e-07
ENSG00000013563	DNASE1L1	-1.10909	1.85e-06	5.58e-05								ENSG00000077238	IL4R	-1.68148	5.65075e-09	1.56567e-07
ENSG00000083937	CHMP2B	-1.03002	1.87e-06	5.63e-05								ENSG00000112118	MCM3	1.28678	5.67758e-09	1.57025e-07
ENSG00000137414	FAM8A1	-0.678648	1.9e-06	5.72e-05								ENSG00000166289	PLEKHF1	2.09237	5.73025e-09	1.58194e-07
ENSG00000075651	PLD1	-1.17499	1.92e-06	5.76e-05								ENSG00000124766	SOX4	-1.37382	5.74959e-09	1.58441e-07
ENSG00000082153	BZW1	-0.780995	1.92e-06	5.76e-05								ENSG00000010310	GIPR	-3.16301	5.90992e-09	1.62565e-07
ENSG00000155366	RHOC	-1.39292	1.92e-06	5.76e-05								ENSG00000071539	TRIP13	1.43176	6.19717e-09	1.7016e-07
ENSG00000134313	KIDINS220	-0.542073	1.98e-06	5.93e-05								ENSG00000106992	AK1	-3.00551	6.21271e-09	1.7028e-07
ENSG00000012822	CALCOCO1	-2.09654	1.99e-06	5.94e-05								ENSG00000168564	CDKN2AIP	-1.0102	6.25422e-09	1.7111e-07
ENSG00000165233	C9orf89	-0.69883	1.99e-06	5.94e-05								ENSG00000108669	CYTH1	-1.52557	6.32836e-09	1.72828e-07
ENSG00000237943	PRKCQ-AS1	0.949659	2e-06	5.95e-05								ENSG00000119801	YPEL5	-1.49418	6.4142e-09	1.74794e-07
ENSG00000173442	EHBP1L1	-1.26418	2.01e-06	5.95e-05								ENSG00000203879	GDI1	-1.00099	6.42329e-09	1.74794e-07
ENSG00000203727	SAMD5	-1.3723	2.03e-06	6e-05								ENSG00000120802	TMPO	1.16796	6.48811e-09	1.76243e-07
ENSG00000054179	ENTPD2	-1.69071	2.04e-06	6e-05								ENSG00000125508	SRMS	-2.5223	6.66912e-09	1.80837e-07
ENSG00000083857	FAT1	-1.32261	2.03e-06	6e-05								ENSG00000006459	KDM7A	-1.76996	6.73906e-09	1.82409e-07
ENSG00000134569	LRP4	1.32465	2.03e-06	6e-05								ENSG00000229656	RP11-462L8.1	-3.3854	7.1478e-09	1.9313e-07
ENSG00000165476	REEP3	-0.692775	2.04e-06	6.01e-05								ENSG00000101384	JAG1	-1.46425	7.32376e-09	1.97534e-07
ENSG00000198858	R3HDM4	-0.742783	2.06e-06	6.05e-05								ENSG00000151893	CACUL1	-1.26211	7.53074e-09	2.02758e-07
ENSG00000023572	GLRX2	-0.590739	2.07e-06	6.05e-05								ENSG00000118855	MFSD1	-1.26089	7.73347e-09	2.07849e-07
ENSG00000189433	GJB4	-5.13753	2.06e-06	6.05e-05								ENSG00000005059	CCDC109B	1.96468	7.77823e-09	2.08684e-07
ENSG00000151893	CACUL1	-0.79243	2.09e-06	6.11e-05								ENSG00000120756	PLS1	-1.45929	8.03044e-09	2.15072e-07
ENSG00000197261	C6orf141	-2.2695	2.11e-06	6.16e-05								ENSG00000239305	RNF103	-1.66161	8.47981e-09	2.26708e-07
ENSG00000149136	SSRP1	0.495278	2.12e-06	6.18e-05								ENSG00000101342	TLDC2	-2.28326	8.59711e-09	2.29442e-07
ENSG00000103966	EHD4	-1.05486	2.17e-06	6.31e-05								ENSG00000148803	FUOM	-1.14868	8.66347e-09	2.30466e-07
ENSG00000183087	GAS6	-0.858282	2.2e-06	6.39e-05								ENSG00000167723	TRPV3	-2.68719	8.66572e-09	2.30466e-07
ENSG00000065613	SLK	-0.960312	2.25e-06	6.5e-05								ENSG00000123104	ITPR2	1.47102	8.96165e-09	2.37921e-07
ENSG00000166833	NAV2	-2.3139	2.26e-06	6.54e-05								ENSG00000140598	EFTUD1	-1.06287	9.28514e-09	2.4608e-07
ENSG00000205356	TECPR1	-0.857421	2.35e-06	6.79e-05								ENSG00000150764	DIXDC1	1.36583	9.46191e-09	2.5033e-07
ENSG00000105963	ADAP1	-0.922252	2.39e-06	6.88e-05								ENSG00000198056	PRIM1	1.6028	1.01187e-08	2.67242e-07
ENSG00000101311	FERMT1	-1.29836	2.41e-06	6.92e-05								ENSG00000134184	GSTM1	1.60905	1.02822e-08	2.71092e-07
ENSG00000103089	FA2H	-1.2658	2.47e-06	7.08e-05								ENSG00000139209	SLC38A4	1.90183	1.03528e-08	2.72481e-07
ENSG00000090006	LTBP4	-1.88307	2.49e-06	7.13e-05								ENSG00000168393	DTYMK	1.42904	1.04593e-08	2.7481e-07
ENSG00000214012	KRT18P38	-1.8753	2.49e-06	7.13e-05								ENSG00000035862	TIMP2	-3.5369	1.05585e-08	2.76938e-07
ENSG00000172379	ARNT2	-1.75381	2.57e-06	7.32e-05								ENSG00000117650	NEK2	1.76228	1.06012e-08	2.7758e-07
ENSG00000187531	SIRT7	-1.09078	2.57e-06	7.32e-05								ENSG00000120278	PLEKHG1	-2.07622	1.09231e-08	2.85519e-07
ENSG00000150687	PRSS23	1.15735	2.58e-06	7.35e-05								ENSG00000113368	LMNB1	1.51433	1.12144e-08	2.9263e-07
ENSG00000084733	RAB10	-0.955419	2.6e-06	7.4e-05								ENSG00000196611	MMP1	-10.1598	1.13287e-08	2.95109e-07
ENSG00000143079	CTTNBP2NL	-0.780441	2.67e-06	7.57e-05								ENSG00000166595	FAM96B	-0.986781	1.15363e-08	3.00004e-07
ENSG00000154358	OBSCN	-1.42022	2.82e-06	8e-05								ENSG00000123405	NFE2	3.0331	1.19674e-08	3.10155e-07
ENSG00000162804	SNED1	-1.7498	2.84e-06	8.03e-05								ENSG00000163235	TGFA	-1.59287	1.19586e-08	3.10155e-07
ENSG00000110046	ATG2A	-0.893386	2.95e-06	8.32e-05								ENSG00000105717	PBX4	-2.32326	1.24326e-08	3.21664e-07
ENSG00000196154	S100A4	-1.54706	2.95e-06	8.32e-05								ENSG00000198517	MAFK	-1.56518	1.27234e-08	3.28631e-07
ENSG00000135919	SERPINE2	-1.21679	2.97e-06	8.34e-05								ENSG00000121152	NCAPH	1.56756	1.27707e-08	3.29293e-07
ENSG00000134324	LPIN1	-0.978444	3e-06	8.42e-05								ENSG00000100439	ABHD4	-1.50772	1.29543e-08	3.33463e-07
												ENSG00000014216	CAPN1	-1.17955	1.29856e-08	3.33706e-07
												ENSG00000065328	MCM10	1.54946	1.31482e-08	3.37315e-07
												ENSG00000111581	NUP107	1.19797	1.33361e-08	3.4156e-07
												ENSG00000084731	KIF3C	-1.61712	1.34179e-08	3.42505e-07
												ENSG00000153044	CENPH	1.40041	1.33979e-08	3.42505e-07
												ENSG00000078070	MCCC1	1.06043	1.3867e-08	3.53377e-07
												ENSG00000080546	SESN1	1.58595	1.53748e-08	3.91146e-07
												ENSG00000130584	ZBTB46	-4.53894	1.57726e-08	4.00364e-07
												ENSG00000172965	MIR4435-1HG	-1.80626	1.57897e-08	4.00364e-07
												ENSG00000106384	MOGAT3	-1.99228	1.59089e-08	4.02718e-07
												ENSG00000101447	FAM83D	1.83287	1.65818e-08	4.18854e-07
												ENSG00000145349	CAMK2D	-1.28157	1.66013e-08	4.18854e-07
												ENSG00000184792	OSBP2	-2.20412	1.72597e-08	4.34745e-07
												ENSG00000187741	FANCA	1.244	1.73281e-08	4.35748e-07
												ENSG00000197043	ANXA6	-1.58417	1.76737e-08	4.43707e-07
												ENSG00000163050	ADCK3	1.20428	1.78165e-08	4.46554e-07
												ENSG00000143878	RHOB	-1.83771	1.79946e-08	4.50278e-07
												ENSG00000119333	WDR34	1.13908	1.80901e-08	4.51926e-07
												ENSG00000106123	EPHB6	-6.09801	1.84093e-08	4.58397e-07
												ENSG00000137310	TCF19	1.23825	1.84055e-08	4.58397e-07
												ENSG00000111897	SERINC1	-1.48219	1.86749e-08	4.64252e-07
												ENSG00000175550	DRAP1	-1.37821	1.93036e-08	4.79101e-07
												ENSG00000110697	PITPNM1	-1.59801	1.94012e-08	4.80469e-07
												ENSG00000261609	GAN	-1.57915	1.94218e-08	4.80469e-07
												ENSG00000157483	MYO1E	-1.03492	1.97453e-08	4.87679e-07
												ENSG00000162878	PKDCC	1.52477	1.98611e-08	4.89747e-07
												ENSG00000104695	PPP2CB	-1.34829	2.12061e-08	5.22067e-07
												ENSG00000197183	C20orf112	-0.882271	2.13847e-08	5.25616e-07
												ENSG00000150457	LATS2	-1.27931	2.17466e-08	5.33649e-07
												ENSG00000183386	FHL3	-1.80434	2.18657e-08	5.35709e-07
												ENSG00000163827	LRRC2	2.38524	2.19254e-08	5.36309e-07
												ENSG00000185043	CIB1	-1.18645	2.2839e-08	5.57761e-07
												ENSG00000132967	HMGB1P5	1.2637	2.32757e-08	5.67518e-07
												ENSG00000156970	BUB1B	1.56902	2.35297e-08	5.72776e-07
												ENSG00000215089	KRT18P11	-3.20786	2.35665e-08	5.72776e-07
												ENSG00000076770	MBNL3	2.15707	2.36863e-08	5.74769e-07
												ENSG00000120306	CYSTM1	-2.17185	2.43122e-08	5.8902e-07
												ENSG00000164211	STARD4	-1.66256	2.46008e-08	5.95067e-07
												ENSG00000051009	FAM160A2	-1.57314	2.48249e-08	5.97641e-07
												ENSG00000134215	VAV3	1.65731	2.47808e-08	5.97641e-07
												ENSG00000159128	IFNGR2	-1.13734	2.48057e-08	5.97641e-07
												ENSG00000127423	AUNIP	1.88172	2.54843e-08	6.11582e-07
												ENSG00000132688	NES	-1.99634	2.54737e-08	6.11582e-07
												ENSG00000110047	EHD1	-1.49076	2.60564e-08	6.2433e-07
												ENSG00000129566	TEP1	-1.19003	2.63037e-08	6.2849e-07
												ENSG00000165233	C9orf89	-1.12348	2.63125e-08	6.2849e-07
												ENSG00000131370	SH3BP5	-1.63504	2.66265e-08	6.3378e-07
												ENSG00000166833	NAV2	-3.27294	2.66588e-08	6.3378e-07
												ENSG00000237238	BMS1P10	-2.37377	2.66127e-08	6.3378e-07
												ENSG00000164045	CDC25A	1.29556	2.7291e-08	6.47801e-07
												ENSG00000170608	FOXA3	-1.33698	2.75456e-08	6.52827e-07
												ENSG00000203814	HIST2H2BF	1.99999	2.7921e-08	6.60695e-07
												ENSG00000117632	STMN1	1.49185	2.86298e-08	6.76418e-07
												ENSG00000124209	RAB22A	-1.31067	2.90277e-08	6.84757e-07
												ENSG00000177000	MTHFR	-1.45831	2.93004e-08	6.90121e-07
												ENSG00000138180	CEP55	1.66996	2.94486e-08	6.92543e-07
												ENSG00000054793	ATP9A	-1.3355	3.00046e-08	7.04531e-07
												ENSG00000101871	MID1	1.53134	3.01177e-08	7.06097e-07
												ENSG00000112769	LAMA4	-5.12909	3.08065e-08	7.21136e-07
												ENSG00000041880	PARP3	-1.59381	3.10831e-08	7.26495e-07
												ENSG00000171988	JMJD1C	-1.28458	3.17775e-08	7.41589e-07
												ENSG00000088325	TPX2	1.64053	3.21125e-08	7.48261e-07
												ENSG00000120885	CLU	-3.42134	3.25415e-08	7.571e-07
												ENSG00000176720	BOK	-1.83148	3.44659e-08	8.0065e-07
												ENSG00000197321	SVIL	-0.939324	3.58249e-08	8.30953e-07
												ENSG00000099256	PRTFDC1	1.51778	3.86492e-08	8.94855e-07
												ENSG00000163808	KIF15	1.6415	3.86974e-08	8.94855e-07
												ENSG00000167914	GSDMA	-8.82225	3.87779e-08	8.95359e-07
												ENSG00000074370	ATP2A3	-1.68831	3.88745e-08	8.9623e-07
												ENSG00000196998	WDR45	-1.53409	3.93074e-08	9.04841e-07
												ENSG00000092841	MYL6	-0.895116	3.98266e-08	9.15412e-07
												ENSG00000134690	CDCA8	1.56091	4.03583e-08	9.26236e-07
												ENSG00000163818	LZTFL1	1.26656	4.17201e-08	9.56049e-07
												ENSG00000136811	ODF2	1.16832	4.19012e-08	9.58757e-07
												ENSG00000137267	TUBB2A	-2.68003	4.26052e-08	9.73405e-07
												ENSG00000143126	CELSR2	1.5887	4.31846e-08	9.85166e-07
												ENSG00000126391	FRMD8	-1.81917	4.41647e-08	1.00602e-06
												ENSG00000100226	GTPBP1	-0.996472	4.42979e-08	1.00675e-06
												ENSG00000114993	RTKN	-1.1977	4.43291e-08	1.00675e-06
												ENSG00000083223	ZCCHC6	-1.09858	4.50421e-08	1.02142e-06
												ENSG00000145247	OCIAD2	-0.978994	4.58737e-08	1.03873e-06
												ENSG00000174371	EXO1	1.58306	4.62931e-08	1.04668e-06
												ENSG00000143067	ZNF697	-1.93525	4.69955e-08	1.06098e-06
												ENSG00000010404	IDS	-1.60676	4.71693e-08	1.06333e-06
												ENSG00000177602	GSG2	1.49401	4.75956e-08	1.07136e-06
												ENSG00000144749	LRIG1	1.75591	4.90164e-08	1.10171e-06
												ENSG00000198900	TOP1	-1.65781	5.10887e-08	1.1466e-06
												ENSG00000250221	KRT8P32	-2.60334	5.19554e-08	1.16434e-06
												ENSG00000182325	FBXL6	-1.81828	5.33612e-08	1.19408e-06
												ENSG00000171617	ENC1	-1.51249	5.50566e-08	1.23011e-06
												ENSG00000184702	SEPT5	-3.68201	5.51326e-08	1.23011e-06
												ENSG00000161647	MPP3	-2.07367	5.63819e-08	1.25615e-06
												ENSG00000131747	TOP2A	1.72102	5.71895e-08	1.27228e-06
												ENSG00000166478	ZNF143	-0.909073	5.79603e-08	1.28755e-06
												ENSG00000136104	RNASEH2B	1.06876	5.9175e-08	1.31262e-06
												ENSG00000163788	SNRK	-1.11946	5.94912e-08	1.31771e-06
												ENSG00000184060	ADAP2	-2.65915	6.04035e-08	1.33598e-06
												ENSG00000196584	XRCC2	1.47938	6.14419e-08	1.35698e-06
												ENSG00000155744	FAM126B	-1.73312	6.43401e-08	1.41893e-06
												ENSG00000118922	KLF12	-4.17633	6.63601e-08	1.46136e-06
												ENSG00000021645	NRXN3	1.87556	6.80699e-08	1.49685e-06
												ENSG00000240849	TMEM189	-1.23758	6.8919e-08	1.51334e-06
												ENSG00000116954	RRAGC	-1.77073	6.93787e-08	1.52124e-06
												ENSG00000137312	FLOT1	-1.25179	6.97799e-08	1.52784e-06
												ENSG00000261553	RP11-29G8.3	-2.45297	7.04487e-08	1.54027e-06
												ENSG00000160862	AZGP1	-1.264	7.27389e-08	1.58806e-06
												ENSG00000164951	PDP1	-1.38532	7.6763e-08	1.67352e-06
												ENSG00000123472	ATPAF1	1.08171	7.81091e-08	1.70043e-06
												ENSG00000178462	TUBAL3	-3.08304	8.0113e-08	1.74157e-06
												ENSG00000123636	BAZ2B	-1.92752	8.03174e-08	1.74353e-06
												ENSG00000167900	TK1	1.75508	8.06137e-08	1.74747e-06
												ENSG00000082458	DLG3	-1.31469	8.09572e-08	1.75242e-06
												ENSG00000151503	NCAPD3	1.22237	8.14952e-08	1.76157e-06
												ENSG00000115221	ITGB6	-2.07846	8.20064e-08	1.77011e-06
												ENSG00000140022	STON2	-1.94822	8.24277e-08	1.77534e-06
												ENSG00000186529	CYP4F3	-2.28762	8.24817e-08	1.77534e-06
												ENSG00000092871	RFFL	-1.17882	8.35116e-08	1.79497e-06
												ENSG00000175063	UBE2C	1.59128	8.3994e-08	1.8028e-06
												ENSG00000135127	CCDC64	-1.65896	8.54651e-08	1.83179e-06
												ENSG00000180263	FGD6	-1.75936	8.76182e-08	1.8753e-06
												ENSG00000169679	BUB1	1.65013	9.02223e-08	1.92833e-06
												ENSG00000108352	RAPGEFL1	-1.79945	9.18829e-08	1.96107e-06
												ENSG00000104147	OIP5	1.81539	9.31196e-08	1.98218e-06
												ENSG00000166387	PPFIBP2	1.1183	9.31324e-08	1.98218e-06
												ENSG00000187583	PLEKHN1	-3.59872	9.53723e-08	2.02703e-06
												ENSG00000122035	RASL11A	2.12145	9.72368e-08	2.06378e-06
												ENSG00000077380	DYNC1I2	-1.06676	9.76637e-08	2.06995e-06
												ENSG00000075651	PLD1	-1.6738	9.81916e-08	2.07825e-06
												ENSG00000125731	SH2D3A	-1.3881	1.00411e-07	2.12227e-06
												ENSG00000112759	SLC29A1	1.38993	1.01009e-07	2.13196e-06
												ENSG00000064547	LPAR2	-1.50477	1.04563e-07	2.20392e-06
												ENSG00000178752	FAM132B	-1.21577	1.0721e-07	2.25659e-06
												ENSG00000121281	ADCY7	-2.57812	1.08549e-07	2.28163e-06
												ENSG00000140534	TICRR	1.72988	1.09735e-07	2.30339e-06
												ENSG00000134222	PSRC1	1.48816	1.12491e-07	2.35797e-06
												ENSG00000117758	STX12	-0.860523	1.12785e-07	2.36089e-06
												ENSG00000233429	HOTAIRM1	-1.95059	1.13151e-07	2.36531e-06
												ENSG00000130703	OSBPL2	-0.852087	1.14075e-07	2.38135e-06
												ENSG00000142634	EFHD2	-1.64072	1.16865e-07	2.43625e-06
												ENSG00000130816	DNMT1	1.20254	1.18466e-07	2.46626e-06
												ENSG00000166938	DIS3L	1.3623	1.24881e-07	2.59626e-06
												ENSG00000203760	CENPW	1.40689	1.26125e-07	2.61856e-06
												ENSG00000109452	INPP4B	-2.18032	1.29076e-07	2.67619e-06
												ENSG00000158050	DUSP2	-2.5175	1.29725e-07	2.68597e-06
												ENSG00000145390	USP53	-1.35423	1.31663e-07	2.7224e-06
												ENSG00000180198	RCC1	1.0355	1.32259e-07	2.73103e-06
												ENSG00000224520	KRT8P45	-3.01701	1.34094e-07	2.76517e-06
												ENSG00000160145	KALRN	-1.18193	1.37666e-07	2.83499e-06
												ENSG00000135451	TROAP	1.62313	1.40355e-07	2.88646e-06
												ENSG00000183579	ZNRF3	1.22398	1.40602e-07	2.88764e-06
												ENSG00000101945	SUV39H1	1.36841	1.42069e-07	2.90992e-06
												ENSG00000130956	HABP4	-0.962409	1.41982e-07	2.90992e-06
												ENSG00000005884	ITGA3	-2.64118	1.46714e-07	2.99702e-06
												ENSG00000134291	TMEM106C	1.15397	1.46709e-07	2.99702e-06
												ENSG00000242247	ARFGAP3	-1.26805	1.49153e-07	3.04276e-06
												ENSG00000129195	FAM64A	1.67892	1.49637e-07	3.04856e-06
												ENSG00000183941	HIST2H4A	2.11791	1.5332e-07	3.11942e-06
												ENSG00000130449	ZSWIM6	-1.25898	1.56837e-07	3.18672e-06
												ENSG00000204540	PSORS1C1	-2.6031	1.57862e-07	3.20328e-06
												ENSG00000176855	KRT18P28	-3.03756	1.59359e-07	3.22934e-06
												ENSG00000247844	CCAT1	-1.89698	1.64807e-07	3.33532e-06
												ENSG00000076382	SPAG5	1.76571	1.71517e-07	3.4665e-06
												ENSG00000166750	SLFN5	-1.84592	1.75441e-07	3.54112e-06
												ENSG00000126870	WDR60	-1.28238	1.75836e-07	3.54441e-06
												ENSG00000091317	CMTM6	-1.17281	1.76322e-07	3.5495e-06
												ENSG00000110429	FBXO3	-0.918053	1.83645e-07	3.69204e-06
												ENSG00000137834	SMAD6	1.26133	1.86632e-07	3.74714e-06
												ENSG00000119866	BCL11A	1.30605	1.91576e-07	3.84136e-06
												ENSG00000110693	SOX6	3.10886	1.97072e-07	3.94077e-06
												ENSG00000139182	CLSTN3	-1.44062	1.97188e-07	3.94077e-06
												ENSG00000181885	CLDN7	-1.21715	1.9731e-07	3.94077e-06
												ENSG00000094804	CDC6	1.18467	1.99082e-07	3.97095e-06
												ENSG00000147144	CCDC120	-1.63393	1.99569e-07	3.97548e-06
												ENSG00000116667	C1orf21	1.53307	2.01463e-07	4.00796e-06
												ENSG00000150687	PRSS23	1.93939	2.09664e-07	4.16568e-06
												ENSG00000103855	CD276	-1.02978	2.13693e-07	4.2402e-06
												ENSG00000101940	WDR13	-1.10448	2.14808e-07	4.25677e-06
												ENSG00000108106	UBE2S	1.51362	2.15093e-07	4.25688e-06
												ENSG00000100065	CARD10	-1.01145	2.15576e-07	4.26091e-06
												ENSG00000007968	E2F2	2.01845	2.19329e-07	4.32948e-06
												ENSG00000136738	STAM	-1.2094	2.21548e-07	4.36761e-06
												ENSG00000132437	DDC	1.03052	2.27047e-07	4.47025e-06
												ENSG00000164649	CDCA7L	1.56011	2.28084e-07	4.48486e-06
												ENSG00000119139	TJP2	-0.801055	2.30703e-07	4.53053e-06
												ENSG00000145386	CCNA2	1.71599	2.3106e-07	4.53169e-06
												ENSG00000149636	DSN1	1.03728	2.42598e-07	4.75186e-06
												ENSG00000081803	CADPS2	1.23518	2.50156e-07	4.89362e-06
												ENSG00000102007	PLP2	-1.15578	2.54179e-07	4.96593e-06
												ENSG00000106268	NUDT1	1.1502	2.6055e-07	5.08389e-06
												ENSG00000078747	ITCH	-0.980905	2.62101e-07	5.10762e-06
												ENSG00000140853	NLRC5	-3.05403	2.68255e-07	5.22087e-06
												ENSG00000126215	XRCC3	1.56877	2.70436e-07	5.2566e-06
												ENSG00000141140	MYO19	1.13778	2.72433e-07	5.28866e-06
												ENSG00000111665	CDCA3	1.75989	2.7672e-07	5.36505e-06
												ENSG00000178882	FAM101A	2.92696	2.81812e-07	5.45684e-06
												ENSG00000183960	KCNH8	-2.78824	2.84052e-07	5.49323e-06
												ENSG00000065357	DGKA	-1.39301	2.90838e-07	5.61735e-06
												ENSG00000130827	PLXNA3	-1.40693	2.94252e-07	5.6532e-06
												ENSG00000162062	C16orf59	1.47737	2.93726e-07	5.6532e-06
												ENSG00000171621	SPSB1	-1.20211	2.94037e-07	5.6532e-06
												ENSG00000182372	CLN8	-1.06052	2.9455e-07	5.6532e-06
												ENSG00000206503	HLA-A	-1.13802	2.93311e-07	5.6532e-06
												ENSG00000182158	CREB3L2	-1.30737	2.97782e-07	5.70805e-06
												ENSG00000156671	SAMD8	-1.39552	2.98887e-07	5.72204e-06
												ENSG00000100526	CDKN3	1.72194	3.04625e-07	5.82456e-06
												ENSG00000141510	TP53	1.15192	3.10801e-07	5.9352e-06
												ENSG00000116514	RNF19B	-1.00595	3.1487e-07	6.00539e-06
												ENSG00000164111	ANXA5	-1.07177	3.16795e-07	6.03455e-06
												ENSG00000092445	TYRO3	1.08274	3.2944e-07	6.26759e-06
												ENSG00000214012	KRT18P38	-2.92328	3.33621e-07	6.33921e-06
												ENSG00000166483	WEE1	1.35798	3.38023e-07	6.41485e-06
												ENSG00000143702	CEP170	-1.11553	3.3913e-07	6.42786e-06
												ENSG00000134909	ARHGAP32	-1.17334	3.39751e-07	6.43164e-06
												ENSG00000188486	H2AFX	1.21963	3.40683e-07	6.44128e-06
												ENSG00000117697	NSL1	1.2239	3.50038e-07	6.60989e-06
												ENSG00000166451	CENPN	1.08797	3.50469e-07	6.60989e-06
												ENSG00000135744	AGT	3.00225	3.53094e-07	6.65117e-06
												ENSG00000131724	IL13RA1	-1.21461	3.54585e-07	6.67101e-06
												ENSG00000064651	SLC12A2	1.20112	3.57473e-07	6.70907e-06
												ENSG00000101003	GINS1	1.52714	3.57488e-07	6.70907e-06
												ENSG00000124225	PMEPA1	-3.46349	3.62335e-07	6.79167e-06
												ENSG00000010818	HIVEP2	-1.35597	3.71193e-07	6.94915e-06
												ENSG00000148660	CAMK2G	0.86895	3.72994e-07	6.97431e-06
												ENSG00000171466	ZNF562	-1.04389	3.74381e-07	6.99165e-06
												ENSG00000139722	VPS37B	-1.37454	3.77831e-07	7.04746e-06
												ENSG00000123684	LPGAT1	-1.07073	3.79145e-07	7.06332e-06
												ENSG00000125885	MCM8	1.12196	3.96635e-07	7.38013e-06
												ENSG00000156510	HKDC1	-1.3999	4.0644e-07	7.55333e-06
												ENSG00000135476	ESPL1	1.85845	4.09967e-07	7.60961e-06
												ENSG00000163466	ARPC2	-0.750836	4.26824e-07	7.9124e-06
												ENSG00000196141	SPATS2L	-0.993849	4.27318e-07	7.9124e-06
												ENSG00000145569	FAM105A	1.2027	4.32485e-07	7.99835e-06
												ENSG00000151690	MFSD6	-1.2	4.35356e-07	8.04168e-06
												ENSG00000126012	KDM5C	-0.801929	4.39495e-07	8.1083e-06
												ENSG00000105011	ASF1B	1.50489	4.40448e-07	8.10914e-06
												ENSG00000116299	KIAA1324	2.73094	4.40604e-07	8.10914e-06
												ENSG00000142197	DOPEY2	-1.03938	4.41287e-07	8.11192e-06
												ENSG00000000460	C1orf112	1.26268	4.47048e-07	8.20791e-06
												ENSG00000186871	ERCC6L	1.44013	4.50339e-07	8.25839e-06
												ENSG00000189067	LITAF	-1.22109	4.56322e-07	8.35804e-06
												ENSG00000047056	WDR37	-0.980124	4.64095e-07	8.49021e-06
												ENSG00000147536	GINS4	1.28069	4.67706e-07	8.546e-06
												ENSG00000143228	NUF2	1.63439	4.74436e-07	8.65861e-06
												ENSG00000138160	KIF11	1.66183	4.75302e-07	8.66404e-06
												ENSG00000261488	RP11-757F18.5	-2.33487	4.78561e-07	8.71302e-06
												ENSG00000008517	IL32	-1.80139	4.84283e-07	8.80667e-06
												ENSG00000116833	NR5A2	-1.41491	4.89e-07	8.88185e-06
												ENSG00000183208	GDPGP1	-1.69465	5.07503e-07	9.20695e-06
												ENSG00000225193	RPS12P26	-2.99356	5.12359e-07	9.284e-06
												ENSG00000142945	KIF2C	1.58191	5.19313e-07	9.39882e-06
												ENSG00000096696	DSP	-1.41192	5.25786e-07	9.50469e-06
												ENSG00000118137	APOA1	-5.64636	5.29599e-07	9.56227e-06
												ENSG00000137440	FGFBP1	-2.36889	5.3273e-07	9.60742e-06
												ENSG00000175203	DCTN2	-0.984793	5.4333e-07	9.787e-06
												ENSG00000172380	GNG12	-1.04149	5.52089e-07	9.93304e-06
												ENSG00000040608	RTN4R	-1.48874	5.58613e-07	1.00386e-05
												ENSG00000221926	TRIM16	-1.16228	5.66334e-07	1.01653e-05
												ENSG00000105486	LIG1	1.32184	5.68437e-07	1.01911e-05
												ENSG00000173207	CKS1B	1.18266	5.91134e-07	1.05855e-05
												ENSG00000168242	HIST1H2BI	1.70338	5.9237e-07	1.05952e-05
												ENSG00000109572	CLCN3	-1.17007	6.02513e-07	1.0764e-05
												ENSG00000164078	MST1R	-2.06325	6.03834e-07	1.0775e-05
												ENSG00000162923	WDR26	-1.23119	6.16851e-07	1.09944e-05
												ENSG00000206341	HLA-H	-2.36635	6.37489e-07	1.13489e-05
												ENSG00000118200	CAMSAP2	-1.08353	6.43385e-07	1.14405e-05
												ENSG00000099194	SCD	-1.10018	6.51944e-07	1.1572e-05
												ENSG00000132646	PCNA	1.12963	6.52296e-07	1.1572e-05
												ENSG00000172031	EPHX4	-1.68575	6.56665e-07	1.1636e-05
												ENSG00000136930	PSMB7	-0.872969	6.64996e-07	1.17699e-05
												ENSG00000131351	HAUS8	1.31463	6.6758e-07	1.18019e-05
												ENSG00000139289	PHLDA1	-1.26378	6.68736e-07	1.18086e-05
												ENSG00000104783	KCNN4	-2.30653	6.70368e-07	1.18238e-05
												ENSG00000004700	RECQL	-0.958298	6.74258e-07	1.18786e-05
												ENSG00000057704	TMCC3	-2.79445	6.90782e-07	1.21557e-05
												ENSG00000107372	ZFAND5	-1.13373	7.02859e-07	1.23539e-05
												ENSG00000135437	RDH5	-2.73216	7.37153e-07	1.29418e-05
												ENSG00000221829	FANCG	1.21726	7.39061e-07	1.29604e-05
												ENSG00000167705	RILP	-1.83137	7.49151e-07	1.31222e-05
												ENSG00000120738	EGR1	-4.56709	7.67139e-07	1.34218e-05
												ENSG00000073464	CLCN4	1.80836	7.74831e-07	1.35254e-05
												ENSG00000198355	PIM3	-1.17494	7.74514e-07	1.35254e-05
												ENSG00000176619	LMNB2	1.08353	8.04273e-07	1.40232e-05
												ENSG00000137309	HMGA1	-1.4552	8.1326e-07	1.41637e-05
												ENSG00000134569	LRP4	2.05121	8.22429e-07	1.43071e-05
												ENSG00000075399	VPS9D1	-1.80386	8.24215e-07	1.43218e-05
												ENSG00000185630	PBX1	1.50032	8.25891e-07	1.43346e-05
												ENSG00000166145	SPINT1	-1.24123	8.36964e-07	1.45102e-05
												ENSG00000104892	KLC3	-5.07508	8.46951e-07	1.46667e-05
												ENSG00000162063	CCNF	1.43748	8.63451e-07	1.49355e-05
												ENSG00000141449	GREB1L	-1.42097	8.65952e-07	1.49588e-05
												ENSG00000260231	JHDM1D-AS1	-2.44064	8.66763e-07	1.49588e-05
												ENSG00000163993	S100P	-1.77534	8.78949e-07	1.51519e-05
												ENSG00000062822	POLD1	1.07732	8.81062e-07	1.51712e-05
												ENSG00000138759	FRAS1	2.0866	8.85439e-07	1.52293e-05
												ENSG00000075218	GTSE1	1.74836	8.97104e-07	1.54126e-05
												ENSG00000135241	PNPLA8	-1.48034	9.03543e-07	1.55057e-05
												ENSG00000156500	FAM122C	-2.58071	9.18896e-07	1.57515e-05
												ENSG00000135709	KIAA0513	-2.25614	9.31606e-07	1.59514e-05
												ENSG00000161800	RACGAP1	1.40597	9.3287e-07	1.59551e-05
												ENSG00000185650	ZFP36L1	-1.26458	9.41328e-07	1.60817e-05
												ENSG00000154358	OBSCN	-2.09645	9.52654e-07	1.6257e-05
												ENSG00000142552	RCN3	2.41961	9.63576e-07	1.6425e-05
												ENSG00000100311	PDGFB	-3.94958	9.73686e-07	1.65788e-05
												ENSG00000152240	HAUS1	1.1618	1.00212e-06	1.70439e-05
												ENSG00000137575	SDCBP	-1.44884	1.03188e-06	1.75305e-05
												ENSG00000140451	PIF1	1.74871	1.03522e-06	1.75676e-05
												ENSG00000166886	NAB2	-1.86642	1.03862e-06	1.76057e-05
												ENSG00000065054	SLC9A3R2	-1.61016	1.04512e-06	1.76962e-05
												ENSG00000023839	ABCC2	1.63987	1.05047e-06	1.77671e-05
												ENSG00000143079	CTTNBP2NL	-1.12941	1.05554e-06	1.78329e-05
												ENSG00000197697	HIST1H2BE	1.66426	1.05701e-06	1.7838e-05
												ENSG00000010292	NCAPD2	1.33852	1.0644e-06	1.79428e-05
												ENSG00000114805	PLCH1	1.18495	1.12398e-06	1.88846e-05
												ENSG00000120675	DNAJC15	-1.04872	1.12382e-06	1.88846e-05
												ENSG00000185130	HIST1H2BL	1.64307	1.12232e-06	1.88846e-05
												ENSG00000146918	NCAPG2	1.33978	1.14714e-06	1.92525e-05
												ENSG00000134531	EMP1	-5.09081	1.16242e-06	1.94661e-05
												ENSG00000183814	LIN9	1.21269	1.16144e-06	1.94661e-05
												ENSG00000151376	ME3	0.947901	1.18407e-06	1.98068e-05
												ENSG00000101057	MYBL2	1.75543	1.18607e-06	1.98185e-05
												ENSG00000175556	LONRF3	-1.16296	1.19162e-06	1.98896e-05
												ENSG00000124693	HIST1H3B	1.54097	1.21676e-06	2.02869e-05
												ENSG00000184678	HIST2H2BE	1.55233	1.22143e-06	2.03425e-05
												ENSG00000118620	ZNF430	-1.14592	1.22794e-06	2.04285e-05
												ENSG00000006831	ADIPOR2	-1.13122	1.23701e-06	2.0557e-05
												ENSG00000099957	P2RX6	-3.52813	1.24575e-06	2.06797e-05
												ENSG00000089195	TRMT6	-0.783809	1.24897e-06	2.07106e-05
												ENSG00000133048	CHI3L1	-5.83648	1.25749e-06	2.08292e-05
												ENSG00000065809	FAM107B	-1.35548	1.28197e-06	2.12117e-05
												ENSG00000167508	MVD	-1.22114	1.29047e-06	2.13292e-05
												ENSG00000109046	WSB1	-1.09556	1.29947e-06	2.14546e-05
												ENSG00000095002	MSH2	1.03811	1.30114e-06	2.14589e-05
												ENSG00000115504	EHBP1	-1.38314	1.34683e-06	2.21843e-05
												ENSG00000154839	SKA1	1.53779	1.34803e-06	2.21843e-05
												ENSG00000183856	IQGAP3	1.60292	1.35532e-06	2.22801e-05
												ENSG00000167600	CYP2S1	-1.0037	1.37096e-06	2.25129e-05
												ENSG00000135097	MSI1	2.42375	1.38009e-06	2.26386e-05
												ENSG00000179299	NSUN7	1.12581	1.3862e-06	2.27143e-05
												ENSG00000256663	RP11-424C20.2	2.03358	1.38934e-06	2.27413e-05
												ENSG00000089199	CHGB	-2.36977	1.39183e-06	2.27577e-05
												ENSG00000168268	NT5DC2	1.26041	1.4031e-06	2.29174e-05
												ENSG00000130150	MOSPD2	-1.2274	1.43238e-06	2.33705e-05
												ENSG00000110911	SLC11A2	1.09643	1.45829e-06	2.37677e-05
												ENSG00000005189	AC004381.6	1.37114	1.48787e-06	2.42239e-05
												ENSG00000137700	SLC37A4	0.752823	1.49121e-06	2.42525e-05
												ENSG00000170271	FAXDC2	-2.9869	1.4939e-06	2.42703e-05
												ENSG00000102699	PARP4	-0.810645	1.51845e-06	2.46429e-05
												ENSG00000213100	KRT18P68	-3.2402	1.52089e-06	2.46561e-05
												ENSG00000141452	C18orf8	-1.03708	1.52897e-06	2.47609e-05
												ENSG00000146054	TRIM7	-2.99982	1.60244e-06	2.59231e-05
												ENSG00000114923	SLC4A3	-3.01775	1.63517e-06	2.64065e-05
												ENSG00000196331	HIST1H2BO	1.47104	1.63579e-06	2.64065e-05
												ENSG00000168286	THAP11	1.11065	1.64449e-06	2.65189e-05
												ENSG00000058056	USP13	1.73727	1.67466e-06	2.69768e-05
												ENSG00000143147	GPR161	4.27729	1.71051e-06	2.75252e-05
												ENSG00000115310	RTN4	-1.00304	1.74825e-06	2.8103e-05
												ENSG00000158467	AHCYL2	-1.25452	1.76032e-06	2.82671e-05
												ENSG00000132334	PTPRE	-1.10689	1.76654e-06	2.83371e-05
												ENSG00000124788	ATXN1	-1.4683	1.78723e-06	2.8639e-05
												ENSG00000178996	SNX18	1.29171	1.82558e-06	2.92227e-05
												ENSG00000107833	NPM3	1.23232	1.83573e-06	2.93544e-05
												ENSG00000158352	SHROOM4	-2.60254	1.85484e-06	2.96289e-05
												ENSG00000069702	TGFBR3	1.67155	1.87376e-06	2.98997e-05
												ENSG00000165861	ZFYVE1	-1.60282	1.96131e-06	3.12507e-05
												ENSG00000196374	HIST1H2BM	1.96256	1.96253e-06	3.12507e-05
												ENSG00000051341	POLQ	1.43225	1.97611e-06	3.14342e-05
												ENSG00000182489	XKRX	-1.59432	1.99747e-06	3.17407e-05
												ENSG00000152766	ANKRD22	-2.09683	2.05553e-06	3.26293e-05
												ENSG00000108861	DUSP3	-0.99274	2.06046e-06	3.26737e-05
												ENSG00000065621	GSTO2	1.11843	2.10635e-06	3.33666e-05
												ENSG00000145990	GFOD1	-3.9642	2.12575e-06	3.3639e-05
												ENSG00000198113	TOR4A	-1.23599	2.16512e-06	3.42265e-05
												ENSG00000196693	ZNF33B	1.22006	2.17842e-06	3.44009e-05
												ENSG00000189403	HMGB1	0.77657	2.18091e-06	3.44046e-05
												ENSG00000165801	ARHGEF40	1.35544	2.19391e-06	3.45383e-05
												ENSG00000172167	MTBP	1.48666	2.19242e-06	3.45383e-05
												ENSG00000265982	RP11-927P21.4	-2.60666	2.21132e-06	3.47763e-05
												ENSG00000068971	PPP2R5B	-2.23949	2.22084e-06	3.48901e-05
												ENSG00000014138	POLA2	1.11036	2.23145e-06	3.49902e-05
												ENSG00000135404	CD63	-1.17004	2.2318e-06	3.49902e-05
												ENSG00000077585	GPR137B	-1.34823	2.27834e-06	3.5683e-05
												ENSG00000092036	HAUS4	1.1357	2.46879e-06	3.86262e-05
												ENSG00000131153	GINS2	1.68939	2.48398e-06	3.88239e-05
												ENSG00000115641	FHL2	-1.3863	2.50596e-06	3.91273e-05
												ENSG00000134996	OSTF1	-0.831169	2.51306e-06	3.91981e-05
												ENSG00000088340	FER1L4	-4.21128	2.52028e-06	3.92705e-05
												ENSG00000168778	TCTN2	1.57336	2.56736e-06	3.99632e-05
												ENSG00000164690	SHH	-1.51677	2.63451e-06	4.09249e-05
												ENSG00000247596	TWF2	-1.19977	2.63384e-06	4.09249e-05
												ENSG00000102886	GDPD3	-2.07731	2.66106e-06	4.12952e-05
												ENSG00000160213	CSTB	-1.28244	2.67297e-06	4.14379e-05
												ENSG00000099337	KCNK6	-1.49917	2.67765e-06	4.14682e-05
												ENSG00000145780	FEM1C	-1.55968	2.69305e-06	4.16644e-05
												ENSG00000166682	TMPRSS5	2.36831	2.7249e-06	4.21143e-05
												ENSG00000149115	TNKS1BP1	-1.06125	2.782e-06	4.29533e-05
												ENSG00000125734	GPR108	-1.23182	2.79761e-06	4.31506e-05
												ENSG00000167552	TUBA1A	-1.52538	2.83037e-06	4.36117e-05
												ENSG00000086065	CHMP5	-0.912346	2.85392e-06	4.39301e-05
												ENSG00000220785	MTMR9LP	-2.23949	2.89271e-06	4.44824e-05
												ENSG00000173598	NUDT4	-0.898348	2.96261e-06	4.55113e-05
												ENSG00000164109	MAD2L1	1.52402	2.9836e-06	4.57875e-05
												ENSG00000102287	GABRE	-1.92036	2.99229e-06	4.58748e-05
												ENSG00000164976	KIAA1161	-1.25322	3.00205e-06	4.59781e-05
												ENSG00000115902	SLC1A4	1.22917	3.00834e-06	4.60282e-05
												ENSG00000068697	LAPTM4A	-0.892221	3.02493e-06	4.61431e-05
												ENSG00000176092	AIM1L	-2.08507	3.02316e-06	4.61431e-05
												ENSG00000253305	PCDHGB6	-1.66747	3.02159e-06	4.61431e-05
												ENSG00000117399	CDC20	1.51677	3.05431e-06	4.65447e-05
												ENSG00000136141	LRCH1	-1.6062	3.08436e-06	4.69557e-05

## Sheet: BRAF Fusions vs. Rest
AGAP3-BRAF, DLG1-BRAF, TRIM24-BRAF vs. All other lines
geneSet	description	link	Size Gene Set	Genes in Gene Set	Expected	Ratio	pValue	padj	FDR	overlapId	userId
R-HSA-1474244	Extracellular matrix organization	http://reactome.org/PathwayBrowser/#/R-HSA-1474244	301	30	9.15579	3.27662	9.34254e-09	5.53078e-06	1.61439e-05	1291;3673;3675;3688;3691;3694;3695;3909;3910;3914;3918;4038;4054;4312;4323;5045;5054;5154;5155;5339;55214;56999;634;6385;7076;7077;726;824;8425;8728	ENSG00000053747;ENSG00000164171;ENSG00000197461;ENSG00000162909;ENSG00000178209;ENSG00000135074;ENSG00000196878;ENSG00000058085;ENSG00000102265;ENSG00000035862;ENSG00000079385;ENSG00000106366;ENSG00000124145;ENSG00000090530;ENSG00000112769;ENSG00000163638;ENSG00000196611;ENSG00000115221;ENSG00000005884;ENSG00000139626;ENSG00000149260;ENSG00000100311;ENSG00000168056;ENSG00000150093;ENSG00000142156…
R-HSA-6785807	Interleukin-4 and Interleukin-13 signaling	http://reactome.org/PathwayBrowser/#/R-HSA-6785807	108	16	3.28513	4.87043	1.49278e-07	8.83728e-05	0.000128977	149233;2353;301;3561;3566;3570;3576;3688;3717;3726;4170;4312;51561;6624;7076;9021	ENSG00000075618;ENSG00000169429;ENSG00000170345;ENSG00000135046;ENSG00000160712;ENSG00000147168;ENSG00000143384;ENSG00000102265;ENSG00000171223;ENSG00000110944;ENSG00000096968;ENSG00000196611;ENSG00000162594;ENSG00000184557;ENSG00000150093;ENSG00000077238
R-HSA-75205	Dissolution of Fibrin Clot	http://reactome.org/PathwayBrowser/#/R-HSA-75205	13	6	0.395433	15.1733	1.08336e-06	0.000641349	0.000624015	302;5054;5270;5271;5329;6281	ENSG00000011422;ENSG00000166401;ENSG00000182718;ENSG00000197747;ENSG00000106366;ENSG00000135919
R-HSA-109582	Hemostasis	http://reactome.org/PathwayBrowser/#/R-HSA-109582	620	41	18.8591	2.17402	1.95271e-06	0.001156	0.000757177	10381;10447;147700;221037;22920;23052;2316;23303;23764;2621;2787;2817;302;3673;3675;3688;3717;4312;4602;489;493;5054;5154;5155;5270;5271;5329;5526;55970;6281;634;6385;64780;7035;7076;7280;7414;7534;79861;80005;8793	ENSG00000164171;ENSG00000197461;ENSG00000011422;ENSG00000166401;ENSG00000075945;ENSG00000182718;ENSG00000196924;ENSG00000197747;ENSG00000102265;ENSG00000079385;ENSG00000106366;ENSG00000124145;ENSG00000196937;ENSG00000197892;ENSG00000185022;ENSG00000096968;ENSG00000258947;ENSG00000058668;ENSG00000137267;ENSG00000149218;ENSG00000178462;ENSG00000171988;ENSG00000196611;ENSG00000174021;ENSG00000005884…
R-HSA-3000157	Laminin interactions	http://reactome.org/PathwayBrowser/#/R-HSA-3000157	30	8	0.912537	8.76677	2.1909e-06	0.00129702	0.000757177	3673;3675;3688;3691;3909;3910;3914;3918	ENSG00000053747;ENSG00000164171;ENSG00000196878;ENSG00000058085;ENSG00000112769;ENSG00000005884;ENSG00000150093;ENSG00000132470
R-HSA-157858	Gap junction trafficking and regulation	http://reactome.org/PathwayBrowser/#/R-HSA-157858	47	9	1.42964	6.29529	9.79822e-06	0.00580054	0.00216665	10381;127534;1601;2700;2706;2707;7082;7280;79861	ENSG00000188910;ENSG00000153071;ENSG00000104067;ENSG00000258947;ENSG00000137267;ENSG00000178462;ENSG00000165474;ENSG00000121743;ENSG00000189433
R-HSA-3000171	Non-integrin membrane-ECM interactions	http://reactome.org/PathwayBrowser/#/R-HSA-3000171	59	10	1.79466	5.5721	9.85338e-06	0.0058332	0.00216665	3673;3688;3691;3909;3910;3914;3918;5154;5155;6385	ENSG00000053747;ENSG00000164171;ENSG00000197461;ENSG00000196878;ENSG00000058085;ENSG00000124145;ENSG00000112769;ENSG00000100311;ENSG00000150093;ENSG00000132470
R-HSA-446107	Type I hemidesmosome assembly	http://reactome.org/PathwayBrowser/#/R-HSA-446107	11	5	0.334597	14.9434	1.00308e-05	0.00593824	0.00216665	3691;3909;3914;3918;5339	ENSG00000053747;ENSG00000178209;ENSG00000196878;ENSG00000058085;ENSG00000132470
R-HSA-6798695	Neutrophil degranulation	http://reactome.org/PathwayBrowser/#/R-HSA-6798695	479	32	14.5702	2.19627	2.32308e-05	0.0137526	0.00434315	10555;10890;1116;11322;138050;1604;1774;1992;272;2934;302;3106;374403;4057;4353;51125;51646;5329;5337;54509;5646;5834;6282;634;6386;64114;7077;7414;84418;966;978;9961	ENSG00000133805;ENSG00000011422;ENSG00000182718;ENSG00000085063;ENSG00000196352;ENSG00000141524;ENSG00000139725;ENSG00000163191;ENSG00000010438;ENSG00000035862;ENSG00000148180;ENSG00000079385;ENSG00000135926;ENSG00000119801;ENSG00000137575;ENSG00000012223;ENSG00000005381;ENSG00000147533;ENSG00000021355;ENSG00000175463;ENSG00000013364;ENSG00000120306;ENSG00000234745;ENSG00000169692;ENSG00000133048…
R-HSA-8874081	MET activates PTK2 signaling	http://reactome.org/PathwayBrowser/#/R-HSA-8874081	30	7	0.912537	7.67092	2.51339e-05	0.0148793	0.00434315	3673;3675;3688;3909;3910;3914;3918	ENSG00000053747;ENSG00000164171;ENSG00000196878;ENSG00000058085;ENSG00000112769;ENSG00000005884;ENSG00000150093
EnsembleGeneID	Gene Symbol
ENSG00000125848	FLRT3
ENSG00000164023	SGMS2
ENSG00000057019	DCBLD2
ENSG00000147065	MSN
ENSG00000144366	GULP1
ENSG00000253368	TRNP1
ENSG00000053747	LAMA3
ENSG00000164171	ITGA2
ENSG00000188277	C15orf62
ENSG00000235750	KIAA0040
ENSG00000075618	FSCN1
ENSG00000099617	EFNA2
ENSG00000101213	PTK6
ENSG00000134954	ETS1
ENSG00000197461	PDGFA
ENSG00000169429	IL8
ENSG00000188064	WNT7B
ENSG00000006327	TNFRSF12A
ENSG00000243927	MRPS6
ENSG00000162909	CAPN2
ENSG00000128591	FLNC
ENSG00000179674	ARL14
ENSG00000133805	AMPD3
ENSG00000125744	RTN2
ENSG00000124143	ARHGAP40
ENSG00000173334	TRIB1
ENSG00000011422	PLAUR
ENSG00000137331	IER3
ENSG00000162975	KCNF1
ENSG00000225190	PLEKHM1
ENSG00000078804	TP53INP2
ENSG00000147883	CDKN2B
ENSG00000125775	SDCBP2
ENSG00000166401	SERPINB8
ENSG00000167895	TMC8
ENSG00000005108	THSD7A
ENSG00000075945	KIFAP3
ENSG00000188643	S100A16
ENSG00000136167	LCP1
ENSG00000185761	ADAMTSL5
ENSG00000101188	NTSR1
ENSG00000178607	ERN1
ENSG00000182718	ANXA2
ENSG00000100097	LGALS1
ENSG00000181191	PJA1
ENSG00000085063	CD59
ENSG00000012061	ERCC1
ENSG00000178209	PLEC
ENSG00000131016	AKAP12
ENSG00000188613	NANOS1
ENSG00000188910	GJB3
ENSG00000197019	SERTAD1
ENSG00000076864	RAP1GAP
ENSG00000171345	KRT19
ENSG00000118922	KLF12
ENSG00000170345	FOS
ENSG00000135046	ANXA1
ENSG00000101457	DNTTIP1
ENSG00000142669	SH3BGRL3
ENSG00000196352	CD55
ENSG00000171346	KRT15
ENSG00000114115	RBP1
ENSG00000259230	CTD-2555C10.3
ENSG00000196924	FLNA
ENSG00000130589	HELZ2
ENSG00000141524	TMC6
ENSG00000176678	FOXL1
ENSG00000163082	SGPP2
ENSG00000197747	S100A10
ENSG00000168143	FAM83B
ENSG00000007516	BAIAP3
ENSG00000170421	KRT8
ENSG00000153391	INO80C
ENSG00000143344	RGL1
ENSG00000069535	MAOB
ENSG00000106258	CYP3A5
ENSG00000135074	ADAM19
ENSG00000138623	SEMA7A
ENSG00000172183	ISG20
ENSG00000160161	CILP2
ENSG00000249898	CTD-2541M15.1
ENSG00000182795	C1orf116
ENSG00000261116	RP3-523K23.2
ENSG00000048471	SNX29
ENSG00000170537	TMC7
ENSG00000204282	TNRC6C-AS1
ENSG00000136002	ARHGEF4
ENSG00000196878	LAMB3
ENSG00000057657	PRDM1
ENSG00000153071	DAB2
ENSG00000107984	DKK1
ENSG00000118276	B4GALT6
ENSG00000189050	RNFT1
ENSG00000116014	KISS1R
ENSG00000130584	ZBTB46
ENSG00000124171	PARD6B
ENSG00000125266	EFNB2
ENSG00000167470	MIDN
ENSG00000188042	ARL4C
ENSG00000124920	MYRF
ENSG00000143797	MBOAT2
ENSG00000166510	CCDC68
ENSG00000174718	KIAA1551
ENSG00000151718	WWC2
ENSG00000116285	ERRFI1
ENSG00000111057	KRT18
ENSG00000163814	CDCP1
ENSG00000116191	RALGPS2
ENSG00000116704	SLC35D1
ENSG00000139725	RHOF
ENSG00000163947	ARHGEF3
ENSG00000110888	CAPRIN2
ENSG00000058085	LAMC2
ENSG00000214814	FER1L6
ENSG00000123240	OPTN
ENSG00000160712	IL6R
ENSG00000147168	IL2RG
ENSG00000144821	MYH15
ENSG00000137877	SPTBN5
ENSG00000143384	MCL1
ENSG00000100439	ABHD4
ENSG00000231991	ANXA2P2
ENSG00000066248	NGEF
ENSG00000099960	SLC7A4
ENSG00000163297	ANTXR2
ENSG00000228903	RASA4CP
ENSG00000133985	TTC9
ENSG00000073711	PPP2R3A
ENSG00000104067	TJP1
ENSG00000185567	AHNAK2
ENSG00000254285	KRT8P3
ENSG00000163191	S100A11
ENSG00000189369	GSPT2
ENSG00000080031	PTPRH
ENSG00000135549	PKIB
ENSG00000169641	LUZP1
ENSG00000185033	SEMA4B
ENSG00000144063	MALL
ENSG00000010438	PRSS3
ENSG00000184060	ADAP2
ENSG00000151689	INPP1
ENSG00000196754	S100A2
ENSG00000101928	MOSPD1
ENSG00000137819	PAQR5
ENSG00000154217	PITPNC1
ENSG00000120899	PTK2B
ENSG00000102265	TIMP1
ENSG00000124466	LYPD3
ENSG00000035862	TIMP2
ENSG00000137700	SLC37A4
ENSG00000148180	GSN
ENSG00000175482	POLD4
ENSG00000171223	JUNB
ENSG00000079385	CEACAM1
ENSG00000155189	AGPAT5
ENSG00000140522	RLBP1
ENSG00000013588	GPRC5A
ENSG00000106366	SERPINE1
ENSG00000253305	PCDHGB6
ENSG00000110944	IL23A
ENSG00000100036	SLC35E4
ENSG00000136059	VILL
ENSG00000131037	EPS8L1
ENSG00000137094	DNAJB5
ENSG00000077585	GPR137B
ENSG00000170542	SERPINB9
ENSG00000143669	LYST
ENSG00000047056	WDR37
ENSG00000005001	PRSS22
ENSG00000182378	PLCXD1
ENSG00000172828	CES3
ENSG00000124145	SDC4
ENSG00000187678	SPRY4
ENSG00000135926	TMBIM1
ENSG00000160360	GPSM1
ENSG00000115170	ACVR1
ENSG00000163898	LIPH
ENSG00000185989	RASA3
ENSG00000090530	LEPREL1
ENSG00000112414	GPR126
ENSG00000117016	RIMS3
ENSG00000119801	YPEL5
ENSG00000116977	LGALS8
ENSG00000146112	PPP1R18
ENSG00000144655	CSRNP1
ENSG00000180198	RCC1
ENSG00000137575	SDCBP
ENSG00000079393	DUSP13
ENSG00000165046	LETM2
ENSG00000134531	EMP1
ENSG00000161714	PLCD3
ENSG00000068697	LAPTM4A
ENSG00000196937	FAM3C
ENSG00000147889	CDKN2A
ENSG00000109321	AREG
ENSG00000164251	F2RL1
ENSG00000175505	CLCF1
ENSG00000197457	STMN3
ENSG00000112769	LAMA4
ENSG00000066084	DIP2B
ENSG00000117595	IRF6
ENSG00000129657	SEC14L1
ENSG00000125089	SH3TC1
ENSG00000197892	KIF13B
ENSG00000167748	KLK1
ENSG00000010404	IDS
ENSG00000012223	LTF
ENSG00000171206	TRIM8
ENSG00000185022	MAFF
ENSG00000250539	KRT8P33
ENSG00000181649	PHLDA2
ENSG00000256940	RP11-783K16.5
ENSG00000213722	DDAH2
ENSG00000067082	KLF6
ENSG00000151693	ASAP2
ENSG00000166446	CDYL2
ENSG00000100228	RAB36
ENSG00000116954	RRAGC
ENSG00000198576	ARC
ENSG00000272695	GAS6-AS2
ENSG00000141449	GREB1L
ENSG00000196923	PDLIM7
ENSG00000096968	JAK2
ENSG00000117868	ESYT2
ENSG00000168679	SLC16A4
ENSG00000005381	MPO
ENSG00000085832	EPS15
ENSG00000147533	GOLGA7
ENSG00000127585	FBXL16
ENSG00000118515	SGK1
ENSG00000105339	DENND3
ENSG00000163638	ADAMTS9
ENSG00000047365	ARAP2
ENSG00000140941	MAP1LC3B
ENSG00000169908	TM4SF1
ENSG00000214207	KRT18P10
ENSG00000258947	TUBB3
ENSG00000058668	ATP2B4
ENSG00000189334	S100A14
ENSG00000138166	DUSP5
ENSG00000027697	IFNGR1
ENSG00000162241	SLC25A45
ENSG00000214595	EML6
ENSG00000142867	BCL10
ENSG00000179388	EGR3
ENSG00000144136	SLC20A1
ENSG00000003402	CFLAR
ENSG00000021355	SERPINB1
ENSG00000073737	DHRS9
ENSG00000124116	WFDC3
ENSG00000137267	TUBB2A
ENSG00000131725	WDR44
ENSG00000198959	TGM2
ENSG00000225339	RP11-513I15.6
ENSG00000149218	ENDOD1
ENSG00000198814	GK
ENSG00000137364	TPMT
ENSG00000115648	MLPH
ENSG00000197956	S100A6
ENSG00000178462	TUBAL3
ENSG00000160408	ST6GALNAC6
ENSG00000125753	VASP
ENSG00000203799	CCDC162P
ENSG00000197142	ACSL5
ENSG00000151715	TMEM45B
ENSG00000204610	TRIM15
ENSG00000115525	ST3GAL5
ENSG00000042493	CAPG
ENSG00000118816	CCNI
ENSG00000171988	JMJD1C
ENSG00000088826	SMOX
ENSG00000136802	LRRC8A
ENSG00000134668	SPOCD1
ENSG00000175463	TBC1D10C
ENSG00000152503	TRIM36
ENSG00000196611	MMP1
ENSG00000130449	ZSWIM6
ENSG00000089639	GMIP
ENSG00000066322	ELOVL1
ENSG00000172965	MIR4435-1HG
ENSG00000173166	RAPH1
ENSG00000179104	TMTC2
ENSG00000109756	RAPGEF2
ENSG00000213406	ANXA2P1
ENSG00000057704	TMCC3
ENSG00000176170	SPHK1
ENSG00000112782	CLIC5
ENSG00000166311	SMPD1
ENSG00000013364	MVP
ENSG00000174021	GNG5
ENSG00000130821	SLC6A8
ENSG00000165474	GJB2
ENSG00000176903	PNMA1
ENSG00000146648	EGFR
ENSG00000101236	RNF24
ENSG00000121039	RDH10
ENSG00000160588	MPZL3
ENSG00000115221	ITGB6
ENSG00000072364	AFF4
ENSG00000113742	CPEB4
ENSG00000005884	ITGA3
ENSG00000139173	TMEM117
ENSG00000137275	RIPK1
ENSG00000196700	ZNF512B
ENSG00000107738	C10orf54
ENSG00000186577	C6orf1
ENSG00000066230	SLC9A3
ENSG00000140022	STON2
ENSG00000213943	KRT18P17
ENSG00000239305	RNF103
ENSG00000140950	TLDC1
ENSG00000214176	PLEKHM1P
ENSG00000110628	SLC22A18
ENSG00000154447	SH3RF1
ENSG00000115084	SLC35F5
ENSG00000237202	AJ239321.3
ENSG00000159267	HLCS
ENSG00000205899	BHLHA9
ENSG00000165092	ALDH1A1
ENSG00000142733	MAP3K6
ENSG00000182372	CLN8
ENSG00000152413	HOMER1
ENSG00000144118	RALB
ENSG00000089159	PXN
ENSG00000162594	IL23R
ENSG00000103742	IGDCC4
ENSG00000184792	OSBP2
ENSG00000118200	CAMSAP2
ENSG00000025772	TOMM34
ENSG00000008513	ST3GAL1
ENSG00000187583	PLEKHN1
ENSG00000104361	NIPAL2
ENSG00000117394	SLC2A1
ENSG00000050405	LIMA1
ENSG00000169994	MYO7B
ENSG00000054793	ATP9A
ENSG00000140526	ABHD2
ENSG00000165169	DYNLT3
ENSG00000120306	CYSTM1
ENSG00000139318	DUSP6
ENSG00000186862	PDZD7
ENSG00000051108	HERPUD1
ENSG00000130513	GDF15
ENSG00000124225	PMEPA1
ENSG00000107338	SHB
ENSG00000234745	HLA-B
ENSG00000184731	FAM110C
ENSG00000173267	SNCG
ENSG00000088367	EPB41L1
ENSG00000204540	PSORS1C1
ENSG00000234737	KRT18P15
ENSG00000142627	EPHA2
ENSG00000128422	KRT17
ENSG00000100003	SEC14L2
ENSG00000147041	SYTL5
ENSG00000184292	TACSTD2
ENSG00000155252	PI4K2A
ENSG00000070159	PTPN3
ENSG00000006453	BAIAP2L1
ENSG00000163235	TGFA
ENSG00000126458	RRAS
ENSG00000063660	GPC1
ENSG00000232803	RP11-93B14.5
ENSG00000173846	PLK3
ENSG00000172375	C2CD2L
ENSG00000071054	MAP4K4
ENSG00000235314	LINC00957
ENSG00000228666	KRT18P1
ENSG00000163395	IGFN1
ENSG00000221968	FADS3
ENSG00000162923	WDR26
ENSG00000091622	PITPNM3
ENSG00000135596	MICAL1
ENSG00000102760	RGCC
ENSG00000007384	RHBDF1
ENSG00000169692	AGPAT2
ENSG00000169213	RAB3B
ENSG00000185507	IRF7
ENSG00000112033	PPARD
ENSG00000167723	TRPV3
ENSG00000088002	SULT2B1
ENSG00000104892	KLC3
ENSG00000172594	SMPDL3A
ENSG00000184557	SOCS3
ENSG00000228705	LINC00659
ENSG00000147459	DOCK5
ENSG00000215807	KRT18P65
ENSG00000106460	TMEM106B
ENSG00000068971	PPP2R5B
ENSG00000118855	MFSD1
ENSG00000184702	SEPT5
ENSG00000224520	KRT8P45
ENSG00000102699	PARP4
ENSG00000156671	SAMD8
ENSG00000074370	ATP2A3
ENSG00000003436	TFPI
ENSG00000151376	ME3
ENSG00000204228	HSD17B8
ENSG00000138678	AGPAT9
ENSG00000001617	SEMA3F
ENSG00000163110	PDLIM5
ENSG00000198900	TOP1
ENSG00000005238	FAM214B
ENSG00000171889	MIR31HG
ENSG00000101342	TLDC2
ENSG00000137947	GTF2B
ENSG00000100221	JOSD1
ENSG00000130164	LDLR
ENSG00000135709	KIAA0513
ENSG00000124097	HMGB1P1
ENSG00000183960	KCNH8
ENSG00000180263	FGD6
ENSG00000088340	FER1L4
ENSG00000175793	SFN
ENSG00000130340	SNX9
ENSG00000110925	CSRNP2
ENSG00000010310	GIPR
ENSG00000100055	CYTH4
ENSG00000065809	FAM107B
ENSG00000130479	MAP1S
ENSG00000197324	LRP10
ENSG00000129566	TEP1
ENSG00000221926	TRIM16
ENSG00000171867	PRNP
ENSG00000172380	GNG12
ENSG00000183624	HMCES
ENSG00000138434	SSFA2
ENSG00000036565	SLC18A1
ENSG00000085117	CD82
ENSG00000139626	ITGB7
ENSG00000118513	MYB
ENSG00000112378	PERP
ENSG00000133048	CHI3L1
ENSG00000171608	PIK3CD
ENSG00000121743	GJA3
ENSG00000100994	PYGB
ENSG00000166750	SLFN5
ENSG00000113369	ARRDC3
ENSG00000158270	COLEC12
ENSG00000179833	SERTAD2
ENSG00000149260	CAPN5
ENSG00000100311	PDGFB
ENSG00000150457	LATS2
ENSG00000247844	CCAT1
ENSG00000263325	LA16c-325D7.1
ENSG00000107833	NPM3
ENSG00000136560	TANK
ENSG00000137648	TMPRSS4
ENSG00000168056	LTBP3
ENSG00000106123	EPHB6
ENSG00000155744	FAM126B
ENSG00000139436	GIT2
ENSG00000164924	YWHAZ
ENSG00000189171	S100A13
ENSG00000120278	PLEKHG1
ENSG00000136811	ODF2
ENSG00000169905	TOR1AIP2
ENSG00000137124	ALDH1B1
ENSG00000143702	CEP170
ENSG00000164951	PDP1
ENSG00000166965	RCCD1
ENSG00000135437	RDH5
ENSG00000226287	TMEM191A
ENSG00000102886	GDPD3
ENSG00000135097	MSI1
ENSG00000166272	WBP1L
ENSG00000123636	BAZ2B
ENSG00000165097	KDM1B
ENSG00000101109	STK4
ENSG00000101844	ATG4A
ENSG00000145247	OCIAD2
ENSG00000128578	STRIP2
ENSG00000150093	ITGB1
ENSG00000173269	MMRN2
ENSG00000103671	TRIP4
ENSG00000142156	COL6A1
ENSG00000156510	HKDC1
ENSG00000072736	NFATC3
ENSG00000174028	FAM3C2
ENSG00000215089	KRT18P11
ENSG00000139044	B4GALNT3
ENSG00000258311	RP11-644F5.10
ENSG00000213771	KRT8P37
ENSG00000182158	CREB3L2
ENSG00000116668	SWT1
ENSG00000132470	ITGB4
ENSG00000149798	CDC42EP2
ENSG00000172031	EPHX4
ENSG00000092820	EZR
ENSG00000186529	CYP4F3
ENSG00000142197	DOPEY2
ENSG00000128923	FAM63B
ENSG00000114923	SLC4A3
ENSG00000136141	LRCH1
ENSG00000165102	HGSNAT
ENSG00000114423	CBLB
ENSG00000008382	MPND
ENSG00000074319	TSG101
ENSG00000204371	EHMT2
ENSG00000174567	GOLT1A
ENSG00000158825	CDA
ENSG00000157227	MMP14
ENSG00000181652	ATG9B
ENSG00000103647	CORO2B
ENSG00000124209	RAB22A
ENSG00000145390	USP53
ENSG00000143067	ZNF697
ENSG00000115504	EHBP1
ENSG00000198742	SMURF1
ENSG00000240668	KRT8P36
ENSG00000116584	ARHGEF2
ENSG00000126391	FRMD8
ENSG00000173221	GLRX
ENSG00000107960	OBFC1
ENSG00000214193	SH3D21
ENSG00000166886	NAB2
ENSG00000109572	CLCN3
ENSG00000253219	KRT18P41
ENSG00000186174	BCL9L
ENSG00000119333	WDR34
ENSG00000090776	EFNB1
ENSG00000106384	MOGAT3
ENSG00000107819	SFXN3
ENSG00000173530	TNFRSF10D
ENSG00000176855	KRT18P28
ENSG00000146477	SLC22A3
ENSG00000010818	HIVEP2
ENSG00000134193	REG4
ENSG00000168564	CDKN2AIP
ENSG00000116455	WDR77
ENSG00000136143	SUCLA2
ENSG00000100422	CERK
ENSG00000156639	ZFAND3
ENSG00000115641	FHL2
ENSG00000196998	WDR45
ENSG00000077238	IL4R
ENSG00000103034	NDRG4
ENSG00000134278	SPIRE1
ENSG00000145780	FEM1C
ENSG00000250221	KRT8P32
ENSG00000235884	LINC00941
ENSG00000183386	FHL3
ENSG00000255112	CHMP1B
ENSG00000118898	PPL
ENSG00000109452	INPP4B
ENSG00000138386	NAB1
ENSG00000140564	FURIN
ENSG00000035403	VCL
ENSG00000099860	GADD45B
ENSG00000013563	DNASE1L1
ENSG00000083937	CHMP2B
ENSG00000137414	FAM8A1
ENSG00000075651	PLD1
ENSG00000082153	BZW1
ENSG00000155366	RHOC
ENSG00000134313	KIDINS220
ENSG00000012822	CALCOCO1
ENSG00000165233	C9orf89
ENSG00000237943	PRKCQ-AS1
ENSG00000173442	EHBP1L1
ENSG00000203727	SAMD5
ENSG00000054179	ENTPD2
ENSG00000083857	FAT1
ENSG00000134569	LRP4
ENSG00000165476	REEP3
ENSG00000198858	R3HDM4
ENSG00000023572	GLRX2
ENSG00000189433	GJB4
ENSG00000151893	CACUL1
ENSG00000197261	C6orf141
ENSG00000149136	SSRP1
ENSG00000103966	EHD4
ENSG00000183087	GAS6
ENSG00000065613	SLK
ENSG00000166833	NAV2
ENSG00000205356	TECPR1
ENSG00000105963	ADAP1
ENSG00000101311	FERMT1
ENSG00000103089	FA2H
ENSG00000090006	LTBP4
ENSG00000214012	KRT18P38
ENSG00000172379	ARNT2
ENSG00000187531	SIRT7
ENSG00000150687	PRSS23
ENSG00000084733	RAB10
ENSG00000143079	CTTNBP2NL
ENSG00000154358	OBSCN
ENSG00000162804	SNED1
ENSG00000110046	ATG2A
ENSG00000196154	S100A4
ENSG00000135919	SERPINE2
ENSG00000134324	LPIN1

## Sheet: AGAP3&DLG1&TRIM24 vs. controls
AGAP3-BRAF, DLG1-BRAF, TRIM24-BRAF vs. All uninduced lines and induced GFP line
geneSet	description	link	Size Gene Set	Genes in Gene Set	Expected	Ratio	pValue	padj	FDR	overlapId	userId
R-HSA-3000157	Laminin interactions	http://reactome.org/PathwayBrowser/#/R-HSA-3000157	30	3	0.0284279	105.53	2.45479e-06	3.68218e-05	0.00212094	3673;3909;3918	ENSG00000053747;ENSG00000164171;ENSG00000058085
R-HSA-8874081	MET activates PTK2 signaling	http://reactome.org/PathwayBrowser/#/R-HSA-8874081	30	3	0.0284279	105.53	2.45479e-06	3.68218e-05	0.00212094	3673;3909;3918	ENSG00000053747;ENSG00000164171;ENSG00000058085
R-HSA-8875878	MET promotes cell motility	http://reactome.org/PathwayBrowser/#/R-HSA-8875878	41	3	0.0388515	77.2171	6.41009e-06	9.61514e-05	0.00369221	3673;3909;3918	ENSG00000053747;ENSG00000164171;ENSG00000058085
R-HSA-3000171	Non-integrin membrane-ECM interactions	http://reactome.org/PathwayBrowser/#/R-HSA-3000171	59	3	0.0559083	53.6593	1.93737e-05	0.000290605	0.00836943	3673;3909;3918	ENSG00000053747;ENSG00000164171;ENSG00000058085
R-HSA-446107	Type I hemidesmosome assembly	http://reactome.org/PathwayBrowser/#/R-HSA-446107	11	2	0.0104236	191.873	4.42505e-05	0.000663757	0.0134377	3909;3918	ENSG00000053747;ENSG00000058085
R-HSA-6806834	Signaling by MET	http://reactome.org/PathwayBrowser/#/R-HSA-6806834	79	3	0.0748602	40.0747	4.66589e-05	0.000699883	0.0134377	3673;3909;3918	ENSG00000053747;ENSG00000164171;ENSG00000058085
R-HSA-2214320	Anchoring fibril formation	http://reactome.org/PathwayBrowser/#/R-HSA-2214320	15	2	0.014214	140.707	8.43075e-05	0.00126461	0.0208119	3909;3918	ENSG00000053747;ENSG00000058085
R-HSA-3928664	Ephrin signaling	http://reactome.org/PathwayBrowser/#/R-HSA-3928664	19	2	0.0180044	111.084	0.000137023	0.00205535	0.0295971	1948;2051	ENSG00000106123;ENSG00000125266
R-HSA-3928662	EPHB-mediated forward signaling	http://reactome.org/PathwayBrowser/#/R-HSA-3928662	42	2	0.0397991	50.2524	0.000681946	0.0102292	0.130934	1948;2051	ENSG00000106123;ENSG00000125266
R-HSA-3928665	EPH-ephrin mediated repulsion of cells	http://reactome.org/PathwayBrowser/#/R-HSA-3928665	51	2	0.0483275	41.3843	0.00100526	0.015079	0.17371	1948;2051	ENSG00000106123;ENSG00000125266
EnsembleGeneID	Gene Symbol
ENSG00000057019	DCBLD2
ENSG00000005001	PRSS22
ENSG00000228705	LINC00659
ENSG00000063660	GPC1
ENSG00000106123	EPHB6
ENSG00000125266	EFNB2
ENSG00000188910	GJB3
ENSG00000053747	LAMA3
ENSG00000069535	MAOB
ENSG00000185567	AHNAK2
ENSG00000164171	ITGA2
ENSG00000058085	LAMC2
ENSG00000172183	ISG20
ENSG00000131016	AKAP12
ENSG00000075618	FSCN1

## Sheet: AGAP3&DLG1 vs. controls
AGAP3-BRAF and DLG1-BRAF vs. All uninduced lines and induced GFP line
EnsembleGeneID	Gene Symbol
ENSG00000157764		BRAF
ENSG00000188613		TACSTD2
ENSG00000184292		NANOS1

## Sheet: DLG1&TRIM24 vs. controls
DLG1-BRAF and TRIM-24 vs. All uninduced lines and induced GFP line
geneSet	description	link	Size Gene Set	Genes in Gene Set	Expected	Ratio	pValue	padj	FDR	overlapId	userId
R-HSA-75205	Dissolution of Fibrin Clot	http://reactome.org/PathwayBrowser/#/R-HSA-75205	13	5	0.179854	27.8003	5.57098e-07	0.000134818	0.000962665	302;5054;5271;5329;6281	ENSG00000011422;ENSG00000106366;ENSG00000197747;ENSG00000182718;ENSG00000166401
R-HSA-6798695	Neutrophil degranulation	http://reactome.org/PathwayBrowser/#/R-HSA-6798695	479	19	6.62693	2.86709	3.21633e-05	0.00778352	0.0205804	11322;1604;1774;1992;23593;272;2934;302;4353;51646;5329;5337;54509;54918;5646;6282;64114;966;9961	ENSG00000011422;ENSG00000075651;ENSG00000091317;ENSG00000013364;ENSG00000013563;ENSG00000005381;ENSG00000135926;ENSG00000051620;ENSG00000010438;ENSG00000119801;ENSG00000139725;ENSG00000163191;ENSG00000021355;ENSG00000148180;ENSG00000141524;ENSG00000182718;ENSG00000196352;ENSG00000133805;ENSG00000085063
R-HSA-446728	Cell junction organization	http://reactome.org/PathwayBrowser/#/R-HSA-446728	91	8	1.25898	6.35436	3.57298e-05	0.00864662	0.0205804	2316;2318;3688;3691;3914;5339;7408;84612	ENSG00000150093;ENSG00000178209;ENSG00000125753;ENSG00000132470;ENSG00000128591;ENSG00000196924;ENSG00000196878;ENSG00000124171
R-HSA-1500931	Cell-Cell communication	http://reactome.org/PathwayBrowser/#/R-HSA-1500931	129	9	1.78471	5.04285	7.26501e-05	0.0175813	0.0313848	2185;2316;2318;3688;3691;3914;5339;7408;84612	ENSG00000150093;ENSG00000120899;ENSG00000178209;ENSG00000125753;ENSG00000132470;ENSG00000128591;ENSG00000196924;ENSG00000196878;ENSG00000124171
R-HSA-446353	Cell-extracellular matrix interactions	http://reactome.org/PathwayBrowser/#/R-HSA-446353	18	4	0.249029	16.0624	9.2516e-05	0.0223889	0.0319735	2316;2318;3688;7408	ENSG00000150093;ENSG00000125753;ENSG00000128591;ENSG00000196924
R-HSA-3000171	Non-integrin membrane-ECM interactions	http://reactome.org/PathwayBrowser/#/R-HSA-3000171	59	6	0.816261	7.35059	0.000155891	0.0377257	0.0448967	3688;3691;3910;3914;5154;6385	ENSG00000150093;ENSG00000132470;ENSG00000197461;ENSG00000112769;ENSG00000124145;ENSG00000196878
R-HSA-2453902	The canonical retinoid cycle in rods (twilight vision)	http://reactome.org/PathwayBrowser/#/R-HSA-2453902	23	4	0.318203	12.5706	0.000253699	0.0613951	0.0584316	10170;157506;5947;6017	ENSG00000073737;ENSG00000140522;ENSG00000121039;ENSG00000114115
R-HSA-1474244	Extracellular matrix organization	http://reactome.org/PathwayBrowser/#/R-HSA-1474244	301	13	4.16431	3.12176	0.000270517	0.0654651	0.0584316	1291;3688;3691;3910;3914;4312;4323;5054;5154;5339;6385;824;8728	ENSG00000150093;ENSG00000178209;ENSG00000132470;ENSG00000106366;ENSG00000142156;ENSG00000135074;ENSG00000162909;ENSG00000157227;ENSG00000197461;ENSG00000112769;ENSG00000124145;ENSG00000196611;ENSG00000196878
R-HSA-446107	Type I hemidesmosome assembly	http://reactome.org/PathwayBrowser/#/R-HSA-446107	11	3	0.152184	19.713	0.000394583	0.0954892	0.07576	3691;3914;5339	ENSG00000178209;ENSG00000132470;ENSG00000196878
R-HSA-3000157	Laminin interactions	http://reactome.org/PathwayBrowser/#/R-HSA-3000157	30	4	0.415048	9.63744	0.000728327	0.176255	0.125855	3688;3691;3910;3914	ENSG00000150093;ENSG00000132470;ENSG00000112769;ENSG00000196878
EnsembleGeneID	Gene Symbol
ENSG00000254285	KRT8P3
ENSG00000089199	CHGB
ENSG00000101782	RIOK3
ENSG00000189369	GSPT2
ENSG00000150093	ITGB1
ENSG00000175482	POLD4
ENSG00000214814	FER1L6
ENSG00000107960	OBFC1
ENSG00000166311	SMPD1
ENSG00000133135	RNF128
ENSG00000120899	PTK2B
ENSG00000142867	BCL10
ENSG00000136143	SUCLA2
ENSG00000185033	SEMA4B
ENSG00000169994	MYO7B
ENSG00000011422	PLAUR
ENSG00000181191	PJA1
ENSG00000138623	SEMA7A
ENSG00000140526	ABHD2
ENSG00000214207	KRT18P10
ENSG00000182378	PLCXD1
ENSG00000075651	PLD1
ENSG00000178209	PLEC
ENSG00000101844	ATG4A
ENSG00000091317	CMTM6
ENSG00000198959	TGM2
ENSG00000163898	LIPH
ENSG00000151693	ASAP2
ENSG00000013364	MVP
ENSG00000196754	S100A2
ENSG00000188042	ARL4C
ENSG00000107738	C10orf54
ENSG00000143344	RGL1
ENSG00000134278	SPIRE1
ENSG00000013563	DNASE1L1
ENSG00000123636	BAZ2B
ENSG00000100422	CERK
ENSG00000159433	STARD9
ENSG00000099337	KCNK6
ENSG00000174136	RGMB
ENSG00000005381	MPO
ENSG00000135926	TMBIM1
ENSG00000189334	S100A14
ENSG00000136560	TANK
ENSG00000101213	PTK6
ENSG00000165169	DYNLT3
ENSG00000169213	RAB3B
ENSG00000134668	SPOCD1
ENSG00000137877	SPTBN5
ENSG00000118922	KLF12
ENSG00000074370	ATP2A3
ENSG00000188277	C15orf62
ENSG00000167460	TPM4
ENSG00000232803	RP11-93B14.5
ENSG00000125775	SDCBP2
ENSG00000134954	ETS1
ENSG00000155189	AGPAT5
ENSG00000168143	FAM83B
ENSG00000184060	ADAP2
ENSG00000117595	IRF6
ENSG00000115084	SLC35F5
ENSG00000130589	HELZ2
ENSG00000135046	ANXA1
ENSG00000101188	NTSR1
ENSG00000249898	CTD-2541M15.1
ENSG00000076928	ARHGEF1
ENSG00000136802	LRRC8A
ENSG00000073711	PPP2R3A
ENSG00000100221	JOSD1
ENSG00000051620	HEBP2
ENSG00000185761	ADAMTSL5
ENSG00000115738	ID2
ENSG00000070159	PTPN3
ENSG00000105355	PLIN3
ENSG00000042493	CAPG
ENSG00000125848	FLRT3
ENSG00000163947	ARHGEF3
ENSG00000125753	VASP
ENSG00000162852	CNST
ENSG00000185022	MAFF
ENSG00000073737	DHRS9
ENSG00000169908	TM4SF1
ENSG00000010438	PRSS3
ENSG00000139044	B4GALNT3
ENSG00000132470	ITGB4
ENSG00000197892	KIF13B
ENSG00000119801	YPEL5
ENSG00000027697	IFNGR1
ENSG00000228903	RASA4CP
ENSG00000185989	RASA3
ENSG00000257743	RP11-1220K2.2
ENSG00000139725	RHOF
ENSG00000105339	DENND3
ENSG00000213722	DDAH2
ENSG00000065613	SLK
ENSG00000197019	SERTAD1
ENSG00000173442	EHBP1L1
ENSG00000166446	CDYL2
ENSG00000204634	TBC1D8
ENSG00000145349	CAMK2D
ENSG00000235314	LINC00957
ENSG00000171345	KRT19
ENSG00000144118	RALB
ENSG00000163814	CDCP1
ENSG00000163191	S100A11
ENSG00000151718	WWC2
ENSG00000186862	PDZD7
ENSG00000164251	F2RL1
ENSG00000088002	SULT2B1
ENSG00000111057	KRT18
ENSG00000137819	PAQR5
ENSG00000188643	S100A16
ENSG00000196937	FAM3C
ENSG00000130340	SNX9
ENSG00000115525	ST3GAL5
ENSG00000124466	LYPD3
ENSG00000106366	SERPINE1
ENSG00000175197	DDIT3
ENSG00000176678	FOXL1
ENSG00000099860	GADD45B
ENSG00000171346	KRT15
ENSG00000101457	DNTTIP1
ENSG00000021355	SERPINB1
ENSG00000116285	ERRFI1
ENSG00000171223	JUNB
ENSG00000074319	TSG101
ENSG00000137364	TPMT
ENSG00000235750	KIAA0040
ENSG00000131037	EPS8L1
ENSG00000197956	S100A6
ENSG00000148180	GSN
ENSG00000156510	HKDC1
ENSG00000066248	NGEF
ENSG00000166510	CCDC68
ENSG00000160360	GPSM1
ENSG00000142156	COL6A1
ENSG00000136002	ARHGEF4
ENSG00000126458	RRAS
ENSG00000118515	SGK1
ENSG00000116977	LGALS8
ENSG00000112378	PERP
ENSG00000140522	RLBP1
ENSG00000085831	TTC39A
ENSG00000092820	EZR
ENSG00000135074	ADAM19
ENSG00000130513	GDF15
ENSG00000123240	OPTN
ENSG00000243927	MRPS6
ENSG00000154217	PITPNC1
ENSG00000162909	CAPN2
ENSG00000099617	EFNA2
ENSG00000186529	CYP4F3
ENSG00000147065	MSN
ENSG00000144366	GULP1
ENSG00000128591	FLNC
ENSG00000025772	TOMM34
ENSG00000100097	LGALS1
ENSG00000170421	KRT8
ENSG00000100036	SLC35E4
ENSG00000160712	IL6R
ENSG00000075945	KIFAP3
ENSG00000106258	CYP3A5
ENSG00000164023	SGMS2
ENSG00000076864	RAP1GAP
ENSG00000143797	MBOAT2
ENSG00000136167	LCP1
ENSG00000197747	S100A10
ENSG00000142669	SH3BGRL3
ENSG00000071054	MAP4K4
ENSG00000048471	SNX29
ENSG00000242247	ARFGAP3
ENSG00000083937	CHMP2B
ENSG00000003436	TFPI
ENSG00000143384	MCL1
ENSG00000121039	RDH10
ENSG00000151376	ME3
ENSG00000133985	TTC9
ENSG00000198648	STK39
ENSG00000157227	MMP14
ENSG00000203799	CCDC162P
ENSG00000113070	HBEGF
ENSG00000197461	PDGFA
ENSG00000141524	TMC6
ENSG00000123405	NFE2
ENSG00000231991	ANXA2P2
ENSG00000144655	CSRNP1
ENSG00000151689	INPP1
ENSG00000112769	LAMA4
ENSG00000185222	WBP5
ENSG00000160588	MPZL3
ENSG00000114115	RBP1
ENSG00000066084	DIP2B
ENSG00000182718	ANXA2
ENSG00000147041	SYTL5
ENSG00000013588	GPRC5A
ENSG00000163297	ANTXR2
ENSG00000173334	TRIB1
ENSG00000080031	PTPRH
ENSG00000196352	CD55
ENSG00000012061	ERCC1
ENSG00000107863	ARHGAP21
ENSG00000123684	LPGAT1
ENSG00000124145	SDC4
ENSG00000137331	IER3
ENSG00000166401	SERPINB8
ENSG00000214595	EML6
ENSG00000007516	BAIAP3
ENSG00000103089	FA2H
ENSG00000196924	FLNA
ENSG00000117016	RIMS3
ENSG00000115091	ACTR3
ENSG00000196611	MMP1
ENSG00000198814	GK
ENSG00000178607	ERN1
ENSG00000005513	SOX8
ENSG00000066322	ELOVL1
ENSG00000255112	CHMP1B
ENSG00000133805	AMPD3
ENSG00000125744	RTN2
ENSG00000006327	TNFRSF12A
ENSG00000143669	LYST
ENSG00000136059	VILL
ENSG00000003402	CFLAR
ENSG00000001617	SEMA3F
ENSG00000170537	TMC7
ENSG00000085063	CD59
ENSG00000196878	LAMB3
ENSG00000137648	TMPRSS4
ENSG00000124171	PARD6B
ENSG00000169435	RASSF6
ENSG00000165474	GJB2
ENSG00000088826	SMOX
ENSG00000135549	PKIB
ENSG00000151715	TMEM45B
ENSG00000179674	ARL14
ENSG00000174718	KIAA1551
ENSG00000253368	TRNP1
ENSG00000161714	PLCD3
ENSG00000225190	PLEKHM1
ENSG00000101928	MOSPD1
ENSG00000078804	TP53INP2
ENSG00000138166	DUSP5

## Sheet: AGAP3 unique
AGAP3-BRAF vs. All uninduced lines and induced GFP line
EnsembleGeneID	Gene Symbol
ENSG00000133612		AGAP3

## Sheet: DLG1 unique
DLG1-BRAF vs. All uninduced lines and induced GFP line
geneSet	description	link	Size Gene Set	Genes in Gene Set	Expected	Ratio	pValue	padj	FDR	overlapId	userId
R-HSA-1640170	Cell Cycle	http://reactome.org/PathwayBrowser/#/R-HSA-1640170	641	102	26.4223	3.86037	0	0	0	1029;10381;10540;1063;11004;11065;1111;11130;11200;113130;11339;115106;1163;1454;1781;1870;220134;2237;22822;22974;2305;23175;23310;23397;23594;23649;25936;2810;286826;3014;332;3717;387103;3978;4001;401541;4085;4171;4172;4173;4174;4176;4605;4751;4957;4998;51053;5111;51512;51659;5347;54069;5424;54821;54892;54930;55143;5516;5526;55388;5557;55839;5695;57060;57122;5985;64946;6502;653604;672;699;701;7…	ENSG00000174371;ENSG00000141510;ENSG00000166451;ENSG00000065328;ENSG00000111581;ENSG00000166508;ENSG00000075218;ENSG00000164924;ENSG00000117650;ENSG00000183598;ENSG00000090097;ENSG00000102901;ENSG00000104695;ENSG00000149554;ENSG00000096968;ENSG00000120802;ENSG00000164109;ENSG00000178462;ENSG00000068971;ENSG00000131153;ENSG00000153044;ENSG00000146670;ENSG00000085840;ENSG00000147536;ENSG00000258947…
R-HSA-69278	Cell Cycle, Mitotic	http://reactome.org/PathwayBrowser/#/R-HSA-69278	536	92	22.0942	4.16399	0	0	0	1029;10381;10540;1063;11004;11065;11130;113130;115106;1163;1454;1781;1870;220134;2237;22822;22974;2305;23175;23310;23397;23594;23649;25936;286826;3014;332;3717;3978;4001;401541;4085;4171;4172;4173;4174;4176;4605;4751;4957;4998;51053;5111;51512;51659;5347;5424;54821;54892;54930;55143;5516;5526;55388;5557;55839;5695;57122;5985;64946;6502;653604;699;701;7083;7112;7153;7157;7280;7465;7846;79019;79861…	ENSG00000141510;ENSG00000166451;ENSG00000065328;ENSG00000111581;ENSG00000166508;ENSG00000075218;ENSG00000117650;ENSG00000183598;ENSG00000102901;ENSG00000104695;ENSG00000096968;ENSG00000120802;ENSG00000164109;ENSG00000178462;ENSG00000068971;ENSG00000131153;ENSG00000153044;ENSG00000146670;ENSG00000085840;ENSG00000147536;ENSG00000258947;ENSG00000167552;ENSG00000188486;ENSG00000091651;ENSG00000167900…
R-HSA-69620	Cell Cycle Checkpoints	http://reactome.org/PathwayBrowser/#/R-HSA-69620	293	56	12.0776	4.63668	0	0	0	1029;1063;11004;11065;1111;11130;11200;1781;220134;23594;25936;2810;3014;332;401541;4085;4171;4172;4173;4174;4176;4998;51512;5347;54821;55143;5516;5526;55388;55839;5695;57060;57122;5985;64946;672;699;701;7157;7465;7534;79019;79980;80152;8340;8349;83540;84515;890;891;9133;9156;9212;990;991;993	ENSG00000174371;ENSG00000141510;ENSG00000166451;ENSG00000065328;ENSG00000111581;ENSG00000166508;ENSG00000075218;ENSG00000164924;ENSG00000090097;ENSG00000102901;ENSG00000104695;ENSG00000149554;ENSG00000164109;ENSG00000068971;ENSG00000153044;ENSG00000085840;ENSG00000188486;ENSG00000012048;ENSG00000091651;ENSG00000142945;ENSG00000183765;ENSG00000175793;ENSG00000077380;ENSG00000117697;ENSG00000125885…
R-HSA-68877	Mitotic Prometaphase	http://reactome.org/PathwayBrowser/#/R-HSA-68877	198	41	8.16166	5.02349	0	0	0	10381;10540;1063;11004;11130;113130;115106;1454;1781;220134;23397;25936;332;401541;4085;4751;4957;5347;54821;54930;55143;5516;5526;55839;57122;64946;699;701;7280;7846;79019;79861;79980;80152;83540;891;9133;9212;93323;991;9918	ENSG00000166451;ENSG00000111581;ENSG00000117650;ENSG00000102901;ENSG00000104695;ENSG00000164109;ENSG00000178462;ENSG00000068971;ENSG00000153044;ENSG00000146670;ENSG00000258947;ENSG00000167552;ENSG00000142945;ENSG00000077380;ENSG00000131351;ENSG00000117697;ENSG00000089685;ENSG00000100162;ENSG00000178999;ENSG00000137267;ENSG00000134057;ENSG00000157456;ENSG00000117399;ENSG00000149636;ENSG00000169679…
R-HSA-5663220	RHO GTPases Activate Formins	http://reactome.org/PathwayBrowser/#/R-HSA-5663220	138	34	5.68843	5.97704	0	0	0	10381;1063;11004;11130;1781;1855;220134;25936;332;388;389;401541;4085;5347;54821;55143;5516;5526;55839;57122;60;64946;699;701;71;7280;7846;79019;79861;79980;80152;83540;9212;991	ENSG00000155366;ENSG00000166451;ENSG00000111581;ENSG00000102901;ENSG00000104695;ENSG00000107404;ENSG00000164109;ENSG00000178462;ENSG00000068971;ENSG00000153044;ENSG00000258947;ENSG00000167552;ENSG00000142945;ENSG00000077380;ENSG00000117697;ENSG00000089685;ENSG00000143878;ENSG00000100162;ENSG00000178999;ENSG00000184009;ENSG00000137267;ENSG00000117399;ENSG00000149636;ENSG00000169679;ENSG00000156970…
R-HSA-2500257	Resolution of Sister Chromatid Cohesion	http://reactome.org/PathwayBrowser/#/R-HSA-2500257	124	32	5.11134	6.26059	0	0	0	10381;1063;11004;11130;113130;1781;220134;25936;332;401541;4085;5347;54821;55143;5516;5526;55839;57122;64946;699;701;7280;7846;79019;79861;79980;80152;83540;891;9133;9212;991	ENSG00000166451;ENSG00000111581;ENSG00000102901;ENSG00000104695;ENSG00000164109;ENSG00000178462;ENSG00000068971;ENSG00000153044;ENSG00000146670;ENSG00000258947;ENSG00000167552;ENSG00000142945;ENSG00000077380;ENSG00000117697;ENSG00000089685;ENSG00000100162;ENSG00000178999;ENSG00000137267;ENSG00000134057;ENSG00000157456;ENSG00000117399;ENSG00000149636;ENSG00000169679;ENSG00000156970;ENSG00000143228…
R-HSA-194315	Signaling by Rho GTPases	http://reactome.org/PathwayBrowser/#/R-HSA-194315	444	58	18.3019	3.16907	2.44249e-15	1.80989e-12	6.02946e-13	10109;10381;10451;10627;1063;11004;11130;116984;128239;147700;1781;1855;220134;23370;25936;2664;2810;29127;3014;332;388;389;401541;4085;4637;5347;54821;55143;5516;5526;55701;55789;55839;57122;60;6242;64946;653604;699;701;71;7280;7534;7846;79019;79861;79980;80152;8340;8349;83540;84033;8997;9055;9181;9212;9743;991	ENSG00000155366;ENSG00000166451;ENSG00000111581;ENSG00000164924;ENSG00000183598;ENSG00000102901;ENSG00000160145;ENSG00000104695;ENSG00000107404;ENSG00000164109;ENSG00000178462;ENSG00000068971;ENSG00000153044;ENSG00000035499;ENSG00000134215;ENSG00000258947;ENSG00000167552;ENSG00000188486;ENSG00000092841;ENSG00000165801;ENSG00000142945;ENSG00000198901;ENSG00000175793;ENSG00000163466;ENSG00000077380…
R-HSA-195258	RHO GTPase Effectors	http://reactome.org/PathwayBrowser/#/R-HSA-195258	316	47	13.0257	3.60826	9.99201e-15	7.40408e-12	2.15827e-12	10109;10381;10627;1063;11004;11130;128239;147700;1781;1855;220134;25936;2810;3014;332;388;389;401541;4085;4637;5347;54821;55143;5516;5526;55839;57122;60;6242;64946;653604;699;701;71;7280;7534;7846;79019;79861;79980;80152;8340;8349;83540;9055;9212;991	ENSG00000155366;ENSG00000166451;ENSG00000111581;ENSG00000164924;ENSG00000183598;ENSG00000102901;ENSG00000104695;ENSG00000107404;ENSG00000164109;ENSG00000178462;ENSG00000068971;ENSG00000153044;ENSG00000258947;ENSG00000167552;ENSG00000188486;ENSG00000092841;ENSG00000142945;ENSG00000198901;ENSG00000175793;ENSG00000163466;ENSG00000077380;ENSG00000117697;ENSG00000089685;ENSG00000184678;ENSG00000143878…
R-HSA-68886	M Phase	http://reactome.org/PathwayBrowser/#/R-HSA-68886	393	53	16.1997	3.27167	1.13243e-14	8.39129e-12	2.17426e-12	10381;10540;1063;11004;11065;11130;113130;115106;1454;1781;220134;23175;23310;23397;25936;3014;332;4001;401541;4085;4751;4957;5347;54821;54892;54930;55143;5516;5526;55839;5695;57122;64946;653604;699;701;7112;7280;7846;79019;79861;79980;80152;8340;8349;83540;891;9133;9212;93323;9700;991;9918	ENSG00000166451;ENSG00000111581;ENSG00000117650;ENSG00000183598;ENSG00000102901;ENSG00000104695;ENSG00000120802;ENSG00000164109;ENSG00000178462;ENSG00000068971;ENSG00000153044;ENSG00000146670;ENSG00000258947;ENSG00000167552;ENSG00000188486;ENSG00000142945;ENSG00000134324;ENSG00000146918;ENSG00000077380;ENSG00000131351;ENSG00000117697;ENSG00000136930;ENSG00000089685;ENSG00000184678;ENSG00000100162…
R-HSA-69190	DNA strand elongation	http://reactome.org/PathwayBrowser/#/R-HSA-69190	32	16	1.31906	12.1299	1.73195e-14	1.28337e-11	2.99281e-12	2237;23649;3978;4171;4172;4173;4174;4176;5111;51659;5424;5557;5985;84296;84515;9837	ENSG00000166508;ENSG00000131153;ENSG00000147536;ENSG00000062822;ENSG00000125885;ENSG00000198056;ENSG00000100297;ENSG00000105486;ENSG00000101003;ENSG00000073111;ENSG00000168496;ENSG00000014138;ENSG00000112118;ENSG00000132646;ENSG00000111445;ENSG00000104738
EnsembleGeneID	Gene Symbol
ENSG00000174371	EXO1
ENSG00000155366	RHOC
ENSG00000196693	ZNF33B
ENSG00000189171	S100A13
ENSG00000163827	LRRC2
ENSG00000164221	CCDC112
ENSG00000137310	TCF19
ENSG00000140525	FANCI
ENSG00000135437	RDH5
ENSG00000108352	RAPGEFL1
ENSG00000250221	KRT8P32
ENSG00000185630	PBX1
ENSG00000141510	TP53
ENSG00000166451	CENPN
ENSG00000065328	MCM10
ENSG00000111581	NUP107
ENSG00000166508	MCM7
ENSG00000075218	GTSE1
ENSG00000116191	RALGPS2
ENSG00000109756	RAPGEF2
ENSG00000253305	PCDHGB6
ENSG00000164924	YWHAZ
ENSG00000117650	NEK2
ENSG00000183598	HIST2H3D
ENSG00000163072	NOSTRIN
ENSG00000090097	PCBP4
ENSG00000160862	AZGP1
ENSG00000146648	EGFR
ENSG00000102699	PARP4
ENSG00000131724	IL13RA1
ENSG00000102901	CENPT
ENSG00000162407	PPAP2B
ENSG00000168564	CDKN2AIP
ENSG00000005884	ITGA3
ENSG00000118276	B4GALT6
ENSG00000175550	DRAP1
ENSG00000166145	SPINT1
ENSG00000064932	SBNO2
ENSG00000160145	KALRN
ENSG00000196700	ZNF512B
ENSG00000159267	HLCS
ENSG00000112782	CLIC5
ENSG00000138759	FRAS1
ENSG00000136104	RNASEH2B
ENSG00000117394	SLC2A1
ENSG00000166478	ZNF143
ENSG00000213771	KRT8P37
ENSG00000166289	PLEKHF1
ENSG00000226287	TMEM191A
ENSG00000050405	LIMA1
ENSG00000203814	HIST2H2BF
ENSG00000185043	CIB1
ENSG00000101109	STK4
ENSG00000261553	RP11-29G8.3
ENSG00000104695	PPP2CB
ENSG00000149554	CHEK1
ENSG00000130703	OSBPL2
ENSG00000129566	TEP1
ENSG00000096968	JAK2
ENSG00000130066	SAT1
ENSG00000130827	PLXNA3
ENSG00000174171	RP11-23P13.6
ENSG00000214655	ZSWIM8
ENSG00000175556	LONRF3
ENSG00000172031	EPHX4
ENSG00000101871	MID1
ENSG00000104361	NIPAL2
ENSG00000116667	C1orf21
ENSG00000114423	CBLB
ENSG00000134569	LRP4
ENSG00000120802	TMPO
ENSG00000182795	C1orf116
ENSG00000172167	MTBP
ENSG00000065621	GSTO2
ENSG00000109452	INPP4B
ENSG00000158470	B4GALT5
ENSG00000243477	NAT6
ENSG00000148339	SLC25A25
ENSG00000102886	GDPD3
ENSG00000107338	SHB
ENSG00000146112	PPP1R18
ENSG00000035862	TIMP2
ENSG00000180198	RCC1
ENSG00000145390	USP53
ENSG00000107404	DVL1
ENSG00000130816	DNMT1
ENSG00000164109	MAD2L1
ENSG00000178462	TUBAL3
ENSG00000183941	HIST2H4A
ENSG00000139182	CLSTN3
ENSG00000176903	PNMA1
ENSG00000130449	ZSWIM6
ENSG00000166803	KIAA0101
ENSG00000101311	FERMT1
ENSG00000068971	PPP2R5B
ENSG00000136153	LMO7
ENSG00000186205	MARC1
ENSG00000137575	SDCBP
ENSG00000132824	SERINC3
ENSG00000079616	KIF22
ENSG00000160161	CILP2
ENSG00000165512	ZNF22
ENSG00000140564	FURIN
ENSG00000078747	ITCH
ENSG00000186174	BCL9L
ENSG00000070731	ST6GALNAC2
ENSG00000137825	ITPKA
ENSG00000088367	EPB41L1
ENSG00000109321	AREG
ENSG00000131153	GINS2
ENSG00000143147	GPR161
ENSG00000135241	PNPLA8
ENSG00000153044	CENPH
ENSG00000035499	DEPDC1B
ENSG00000120756	PLS1
ENSG00000146670	CDCA5
ENSG00000085840	ORC1
ENSG00000166938	DIS3L
ENSG00000165097	KDM1B
ENSG00000147536	GINS4
ENSG00000152766	ANKRD22
ENSG00000132967	HMGB1P5
ENSG00000134215	VAV3
ENSG00000027075	PRKCH
ENSG00000258947	TUBB3
ENSG00000006459	KDM7A
ENSG00000107819	SFXN3
ENSG00000102007	PLP2
ENSG00000135404	CD63
ENSG00000173846	PLK3
ENSG00000165480	SKA3
ENSG00000198561	CTNND1
ENSG00000186577	C6orf1
ENSG00000108669	CYTH1
ENSG00000117868	ESYT2
ENSG00000167552	TUBA1A
ENSG00000021762	OSBPL5
ENSG00000113758	DBN1
ENSG00000051341	POLQ
ENSG00000188486	H2AFX
ENSG00000155744	FAM126B
ENSG00000102287	GABRE
ENSG00000110693	SOX6
ENSG00000012822	CALCOCO1
ENSG00000161981	SNRNP25
ENSG00000100116	GCAT
ENSG00000092841	MYL6
ENSG00000012048	BRCA1
ENSG00000224520	KRT8P45
ENSG00000126012	KDM5C
ENSG00000145685	LHFPL2
ENSG00000149115	TNKS1BP1
ENSG00000165801	ARHGEF40
ENSG00000104889	RNASEH2A
ENSG00000099194	SCD
ENSG00000091651	ORC6
ENSG00000000460	C1orf112
ENSG00000113742	CPEB4
ENSG00000250539	KRT8P33
ENSG00000126391	FRMD8
ENSG00000166886	NAB2
ENSG00000146072	TNFRSF21
ENSG00000076382	SPAG5
ENSG00000184916	JAG2
ENSG00000143126	CELSR2
ENSG00000021300	PLEKHB1
ENSG00000163808	KIF15
ENSG00000117525	F3
ENSG00000167900	TK1
ENSG00000057657	PRDM1
ENSG00000174021	GNG5
ENSG00000137700	SLC37A4
ENSG00000118137	APOA1
ENSG00000064547	LPAR2
ENSG00000145247	OCIAD2
ENSG00000145990	GFOD1
ENSG00000160752	FDPS
ENSG00000215089	KRT18P11
ENSG00000145569	FAM105A
ENSG00000220785	MTMR9LP
ENSG00000171988	JMJD1C
ENSG00000140598	EFTUD1
ENSG00000213406	ANXA2P1
ENSG00000148803	FUOM
ENSG00000167705	RILP
ENSG00000142945	KIF2C
ENSG00000198901	PRC1
ENSG00000103742	IGDCC4
ENSG00000134324	LPIN1
ENSG00000156671	SAMD8
ENSG00000143067	ZNF697
ENSG00000109046	WSB1
ENSG00000183765	CHEK2
ENSG00000118513	MYB
ENSG00000213100	KRT18P68
ENSG00000110429	FBXO3
ENSG00000181652	ATG9B
ENSG00000089902	RCOR1
ENSG00000132437	DDC
ENSG00000121440	PDZRN3
ENSG00000234737	KRT18P15
ENSG00000175793	SFN
ENSG00000152413	HOMER1
ENSG00000163466	ARPC2
ENSG00000183814	LIN9
ENSG00000171621	SPSB1
ENSG00000180263	FGD6
ENSG00000179833	SERTAD2
ENSG00000181649	PHLDA2
ENSG00000197183	C20orf112
ENSG00000005238	FAM214B
ENSG00000165092	ALDH1A1
ENSG00000106003	LFNG
ENSG00000143079	CTTNBP2NL
ENSG00000092871	RFFL
ENSG00000115310	RTN4
ENSG00000117632	STMN1
ENSG00000196998	WDR45
ENSG00000189403	HMGB1
ENSG00000095002	MSH2
ENSG00000147533	GOLGA7
ENSG00000079385	CEACAM1
ENSG00000167895	TMC8
ENSG00000153391	INO80C
ENSG00000007384	RHBDF1
ENSG00000165861	ZFYVE1
ENSG00000146918	NCAPG2
ENSG00000221926	TRIM16
ENSG00000170608	FOXA3
ENSG00000077380	DYNC1I2
ENSG00000130956	HABP4
ENSG00000091622	PITPNM3
ENSG00000069702	TGFBR3
ENSG00000131351	HAUS8
ENSG00000116299	KIAA1324
ENSG00000062822	POLD1
ENSG00000157483	MYO1E
ENSG00000140853	NLRC5
ENSG00000140534	TICRR
ENSG00000127423	AUNIP
ENSG00000156398	SFXN2
ENSG00000179361	ARID3B
ENSG00000124143	ARHGAP40
ENSG00000078070	MCCC1
ENSG00000148660	CAMK2G
ENSG00000198752	CDC42BPB
ENSG00000135744	AGT
ENSG00000183208	GDPGP1
ENSG00000197142	ACSL5
ENSG00000178882	FAM101A
ENSG00000160213	CSTB
ENSG00000147642	SYBU
ENSG00000065809	FAM107B
ENSG00000117697	NSL1
ENSG00000137440	FGFBP1
ENSG00000041880	PARP3
ENSG00000007968	E2F2
ENSG00000106268	NUDT1
ENSG00000092470	WDR76
ENSG00000184702	SEPT5
ENSG00000168679	SLC16A4
ENSG00000125885	MCM8
ENSG00000143702	CEP170
ENSG00000260807	RP11-161M6.2
ENSG00000105971	CAV2
ENSG00000136930	PSMB7
ENSG00000104880	ARHGEF18
ENSG00000118620	ZNF430
ENSG00000116833	NR5A2
ENSG00000101447	FAM83D
ENSG00000198056	PRIM1
ENSG00000120885	CLU
ENSG00000187583	PLEKHN1
ENSG00000065054	SLC9A3R2
ENSG00000159128	IFNGR2
ENSG00000100297	MCM5
ENSG00000040608	RTN4R
ENSG00000115616	SLC9A2
ENSG00000125734	GPR108
ENSG00000145386	CCNA2
ENSG00000197261	C6orf141
ENSG00000169692	AGPAT2
ENSG00000139289	PHLDA1
ENSG00000142197	DOPEY2
ENSG00000198517	MAFK
ENSG00000107281	NPDC1
ENSG00000089685	BIRC5
ENSG00000128016	ZFP36
ENSG00000171466	ZNF562
ENSG00000103966	EHD4
ENSG00000184678	HIST2H2BE
ENSG00000179104	TMTC2
ENSG00000167513	CDT1
ENSG00000176855	KRT18P28
ENSG00000128578	STRIP2
ENSG00000183087	GAS6
ENSG00000225193	RPS12P26
ENSG00000143878	RHOB
ENSG00000162804	SNED1
ENSG00000241186	TDGF1
ENSG00000088340	FER1L4
ENSG00000196374	HIST1H2BM
ENSG00000105486	LIG1
ENSG00000113369	ARRDC3
ENSG00000184792	OSBP2
ENSG00000112033	PPARD
ENSG00000137804	NUSAP1
ENSG00000115902	SLC1A4
ENSG00000067082	KLF6
ENSG00000089195	TRMT6
ENSG00000196141	SPATS2L
ENSG00000116704	SLC35D1
ENSG00000198113	TOR4A
ENSG00000104892	KLC3
ENSG00000182606	TRAK1
ENSG00000168778	TCTN2
ENSG00000122035	RASL11A
ENSG00000100311	PDGFB
ENSG00000173221	GLRX
ENSG00000138160	KIF11
ENSG00000167914	GSDMA
ENSG00000214176	PLEKHM1P
ENSG00000214193	SH3D21
ENSG00000261116	RP3-523K23.2
ENSG00000124920	MYRF
ENSG00000185650	ZFP36L1
ENSG00000256940	RP11-783K16.5
ENSG00000137309	HMGA1
ENSG00000106460	TMEM106B
ENSG00000119139	TJP2
ENSG00000125089	SH3TC1
ENSG00000213943	KRT18P17
ENSG00000135097	MSI1
ENSG00000101003	GINS1
ENSG00000163050	ADCK3
ENSG00000090006	LTBP4
ENSG00000096696	DSP
ENSG00000058056	USP13
ENSG00000117298	ECE1
ENSG00000184731	FAM110C
ENSG00000034063	UHRF1
ENSG00000100162	CENPM
ENSG00000100526	CDKN3
ENSG00000010404	IDS
ENSG00000172375	C2CD2L
ENSG00000071539	TRIP13
ENSG00000196584	XRCC2
ENSG00000100003	SEC14L2
ENSG00000178999	AURKB
ENSG00000186594	MIR22HG
ENSG00000163993	S100P
ENSG00000206341	HLA-H
ENSG00000092445	TYRO3
ENSG00000136830	FAM129B
ENSG00000120306	CYSTM1
ENSG00000161800	RACGAP1
ENSG00000057704	TMCC3
ENSG00000135476	ESPL1
ENSG00000090776	EFNB1
ENSG00000077238	IL4R
ENSG00000073111	MCM2
ENSG00000164976	KIAA1161
ENSG00000167508	MVD
ENSG00000110492	MDK
ENSG00000112414	GPR126
ENSG00000117472	TSPAN1
ENSG00000160408	ST6GALNAC6
ENSG00000173207	CKS1B
ENSG00000114923	SLC4A3
ENSG00000030110	BAK1
ENSG00000140859	KIFC3
ENSG00000084731	KIF3C
ENSG00000163235	TGFA
ENSG00000139636	LMBR1L
ENSG00000100226	GTPBP1
ENSG00000128923	FAM63B
ENSG00000010310	GIPR
ENSG00000183579	ZNRF3
ENSG00000170340	B3GNT2
ENSG00000115641	FHL2
ENSG00000124766	SOX4
ENSG00000240849	TMEM189
ENSG00000182489	XKRX
ENSG00000196535	MYO18A
ENSG00000047365	ARAP2
ENSG00000175182	FAM131A
ENSG00000184009	ACTG1
ENSG00000113368	LMNB1
ENSG00000134184	GSTM1
ENSG00000147168	IL2RG
ENSG00000106384	MOGAT3
ENSG00000178996	SNX18
ENSG00000164211	STARD4
ENSG00000142733	MAP3K6
ENSG00000101940	WDR13
ENSG00000259230	CTD-2555C10.3
ENSG00000198858	R3HDM4
ENSG00000099256	PRTFDC1
ENSG00000145780	FEM1C
ENSG00000137267	TUBB2A
ENSG00000124209	RAB22A
ENSG00000189067	LITAF
ENSG00000203879	GDI1
ENSG00000170542	SERPINB9
ENSG00000115504	EHBP1
ENSG00000265982	RP11-927P21.4
ENSG00000169429	IL8
ENSG00000158050	DUSP2
ENSG00000168268	NT5DC2
ENSG00000162063	CCNF
ENSG00000111897	SERINC1
ENSG00000166595	FAM96B
ENSG00000110888	CAPRIN2
ENSG00000088325	TPX2
ENSG00000151491	EPS8
ENSG00000131067	GGT7
ENSG00000134317	GRHL1
ENSG00000120738	EGR1
ENSG00000161647	MPP3
ENSG00000138180	CEP55
ENSG00000007062	PROM1
ENSG00000176720	BOK
ENSG00000005059	CCDC109B
ENSG00000150687	PRSS23
ENSG00000164649	CDCA7L
ENSG00000168496	FEN1
ENSG00000256663	RP11-424C20.2
ENSG00000100350	FOXRED2
ENSG00000089220	PEBP1
ENSG00000134193	REG4
ENSG00000130584	ZBTB46
ENSG00000072364	AFF4
ENSG00000006831	ADIPOR2
ENSG00000156500	FAM122C
ENSG00000080546	SESN1
ENSG00000163545	NUAK2
ENSG00000126870	WDR60
ENSG00000166750	SLFN5
ENSG00000183597	TANGO2
ENSG00000145604	SKP2
ENSG00000048342	CC2D2A
ENSG00000014216	CAPN1
ENSG00000058668	ATP2B4
ENSG00000197324	LRP10
ENSG00000005189	AC004381.6
ENSG00000137834	SMAD6
ENSG00000111206	FOXM1
ENSG00000107372	ZFAND5
ENSG00000101057	MYBL2
ENSG00000155252	PI4K2A
ENSG00000073464	CLCN4
ENSG00000119333	WDR34
ENSG00000186318	BACE1
ENSG00000144749	LRIG1
ENSG00000021645	NRXN3
ENSG00000131069	ACSS2
ENSG00000062716	VMP1
ENSG00000240668	KRT8P36
ENSG00000118855	MFSD1
ENSG00000170345	FOS
ENSG00000152503	TRIM36
ENSG00000253219	KRT18P41
ENSG00000167723	TRPV3
ENSG00000229656	RP11-462L8.1
ENSG00000016391	CHDH
ENSG00000233429	HOTAIRM1
ENSG00000261609	GAN
ENSG00000177000	MTHFR
ENSG00000124788	ATXN1
ENSG00000166682	TMPRSS5
ENSG00000104783	KCNN4
ENSG00000075711	DLG1
ENSG00000132780	NASP
ENSG00000159055	MIS18A
ENSG00000182325	FBXL6
ENSG00000110697	PITPNM1
ENSG00000140950	TLDC1
ENSG00000101384	JAG1
ENSG00000105011	ASF1B
ENSG00000126215	XRCC3
ENSG00000134057	CCNB1
ENSG00000247844	CCAT1
ENSG00000143891	GALM
ENSG00000116584	ARHGEF2
ENSG00000198830	HMGN2
ENSG00000134531	EMP1
ENSG00000114805	PLCH1
ENSG00000076770	MBNL3
ENSG00000124225	PMEPA1
ENSG00000151893	CACUL1
ENSG00000164951	PDP1
ENSG00000115009	CCL20
ENSG00000157456	CCNB2
ENSG00000168056	LTBP3
ENSG00000176619	LMNB2
ENSG00000196331	HIST1H2BO
ENSG00000101945	SUV39H1
ENSG00000110628	SLC22A18
ENSG00000129657	SEC14L1
ENSG00000198742	SMURF1
ENSG00000167670	CHAF1A
ENSG00000131370	SH3BP5
ENSG00000204610	TRIM15
ENSG00000171606	ZNF274
ENSG00000117399	CDC20
ENSG00000118200	CAMSAP2
ENSG00000149218	ENDOD1
ENSG00000197457	STMN3
ENSG00000158352	SHROOM4
ENSG00000134909	ARHGAP32
ENSG00000123104	ITPR2
ENSG00000051108	HERPUD1
ENSG00000185130	HIST1H2BL
ENSG00000150764	DIXDC1
ENSG00000144136	SLC20A1
ENSG00000102048	ASB9
ENSG00000014138	POLA2
ENSG00000239305	RNF103
ENSG00000132334	PTPRE
ENSG00000138434	SSFA2
ENSG00000135596	MICAL1
ENSG00000084733	RAB10
ENSG00000100065	CARD10
ENSG00000147889	CDKN2A
ENSG00000163110	PDLIM5
ENSG00000163874	ZC3H12A
ENSG00000173598	NUDT4
ENSG00000168242	HIST1H2BI
ENSG00000204580	DDR1
ENSG00000158467	AHCYL2
ENSG00000101608	MYL12A
ENSG00000149636	DSN1
ENSG00000198900	TOP1
ENSG00000173166	RAPH1
ENSG00000099960	SLC7A4
ENSG00000169679	BUB1
ENSG00000115221	ITGB6
ENSG00000100558	PLEK2
ENSG00000092036	HAUS4
ENSG00000181885	CLDN7
ENSG00000260231	JHDM1D-AS1
ENSG00000171617	ENC1
ENSG00000152240	HAUS1
ENSG00000100994	PYGB
ENSG00000156970	BUB1B
ENSG00000172965	MIR4435-1HG
ENSG00000197321	SVIL
ENSG00000165233	C9orf89
ENSG00000112312	GMNN
ENSG00000103855	CD276
ENSG00000203760	CENPW
ENSG00000108861	DUSP3
ENSG00000110046	ATG2A
ENSG00000150457	LATS2
ENSG00000247596	TWF2
ENSG00000183856	IQGAP3
ENSG00000112759	SLC29A1
ENSG00000141449	GREB1L
ENSG00000172380	GNG12
ENSG00000164045	CDC25A
ENSG00000187678	SPRY4
ENSG00000151503	NCAPD3
ENSG00000125508	SRMS
ENSG00000099957	P2RX6
ENSG00000105717	PBX4
ENSG00000068697	LAPTM4A
ENSG00000143228	NUF2
ENSG00000166387	PPFIBP2
ENSG00000135709	KIAA0513
ENSG00000094804	CDC6
ENSG00000082458	DLG3
ENSG00000006453	BAIAP2L1
ENSG00000196923	PDLIM7
ENSG00000139318	DUSP6
ENSG00000213923	CSNK1E
ENSG00000186871	ERCC6L
ENSG00000142634	EFHD2
ENSG00000141458	NPC1
ENSG00000085832	EPS15
ENSG00000168393	DTYMK
ENSG00000164104	HMGB2
ENSG00000165915	SLC39A13
ENSG00000109572	CLCN3
ENSG00000085117	CD82
ENSG00000153071	DAB2
ENSG00000010818	HIVEP2
ENSG00000130164	LDLR
ENSG00000130150	MOSPD2
ENSG00000116954	RRAGC
ENSG00000162923	WDR26
ENSG00000075624	ACTB
ENSG00000023839	ABCC2
ENSG00000123472	ATPAF1
ENSG00000154358	OBSCN
ENSG00000135451	TROAP
ENSG00000167600	CYP2S1
ENSG00000261488	RP11-757F18.5
ENSG00000122952	ZWINT
ENSG00000100228	RAB36
ENSG00000154447	SH3RF1
ENSG00000187531	SIRT7
ENSG00000105963	ADAP1
ENSG00000188312	CENPP
ENSG00000104147	OIP5
ENSG00000175063	UBE2C
ENSG00000182372	CLN8
ENSG00000124882	EREG
ENSG00000149260	CAPN5
ENSG00000179299	NSUN7
ENSG00000077585	GPR137B
ENSG00000110047	EHD1
ENSG00000221968	FADS3
ENSG00000147144	CCDC120
ENSG00000141140	MYO19
ENSG00000140451	PIF1
ENSG00000112118	MCM3
ENSG00000166333	ILK
ENSG00000085978	ATG16L1
ENSG00000176974	SHMT1
ENSG00000134222	PSRC1
ENSG00000075399	VPS9D1
ENSG00000136141	LRCH1
ENSG00000100439	ABHD4
ENSG00000183960	KCNH8
ENSG00000110911	SLC11A2
ENSG00000142552	RCN3
ENSG00000197697	HIST1H2BE
ENSG00000163818	LZTFL1
ENSG00000144554	FANCD2
ENSG00000166483	WEE1
ENSG00000134291	TMEM106C
ENSG00000136840	ST6GALNAC4
ENSG00000140941	MAP1LC3B
ENSG00000107833	NPM3
ENSG00000206503	HLA-A
ENSG00000081803	CADPS2
ENSG00000167748	KLK1
ENSG00000097033	SH3GLB1
ENSG00000140022	STON2
ENSG00000112394	SLC16A10
ENSG00000106992	AK1
ENSG00000068489	PRR11
ENSG00000083857	FAT1
ENSG00000237238	BMS1P10
ENSG00000137124	ALDH1B1
ENSG00000111665	CDCA3
ENSG00000099625	C19orf26
ENSG00000177602	GSG2
ENSG00000187741	FANCA
ENSG00000064651	SLC12A2
ENSG00000130479	MAP1S
ENSG00000204282	TNRC6C-AS1
ENSG00000176092	AIM1L
ENSG00000164690	SHH
ENSG00000120675	DNAJC15
ENSG00000221829	FANCG
ENSG00000132646	PCNA
ENSG00000090889	KIF4A
ENSG00000125731	SH2D3A
ENSG00000135127	CCDC64
ENSG00000004700	RECQL
ENSG00000117724	CENPF
ENSG00000134690	CDCA8
ENSG00000082153	BZW1
ENSG00000185507	IRF7
ENSG00000086065	CHMP5
ENSG00000108106	UBE2S
ENSG00000089159	PXN
ENSG00000204128	C2orf72
ENSG00000136738	STAM
ENSG00000149295	DRD2
ENSG00000116514	RNF19B
ENSG00000142627	EPHA2
ENSG00000171206	TRIM8
ENSG00000228666	KRT18P1
ENSG00000169641	LUZP1
ENSG00000160888	IER2
ENSG00000166833	NAV2
ENSG00000215807	KRT18P65
ENSG00000139209	SLC38A4
ENSG00000124693	HIST1H3B
ENSG00000083223	ZCCHC6
ENSG00000051009	FAM160A2
ENSG00000137312	FLOT1
ENSG00000117758	STX12
ENSG00000047056	WDR37
ENSG00000104067	TJP1
ENSG00000133048	CHI3L1
ENSG00000102265	TIMP1
ENSG00000149798	CDC42EP2
ENSG00000170271	FAXDC2
ENSG00000120278	PLEKHG1
ENSG00000182158	CREB3L2
ENSG00000146054	TRIM7
ENSG00000065357	DGKA
ENSG00000167325	RRM1
ENSG00000205356	TECPR1
ENSG00000114529	C3orf52
ENSG00000136811	ODF2
ENSG00000162878	PKDCC
ENSG00000141452	C18orf8
ENSG00000198355	PIM3
ENSG00000129195	FAM64A
ENSG00000143476	DTL
ENSG00000121152	NCAPH
ENSG00000134996	OSTF1
ENSG00000137094	DNAJB5
ENSG00000101342	TLDC2
ENSG00000214012	KRT18P38
ENSG00000178752	FAM132B
ENSG00000197043	ANXA6
ENSG00000144063	MALL
ENSG00000114993	RTKN
ENSG00000010292	NCAPD2
ENSG00000106089	STX1A
ENSG00000167470	MIDN
ENSG00000112562	SMOC2
ENSG00000054179	ENTPD2
ENSG00000008517	IL32
ENSG00000163788	SNRK
ENSG00000162241	SLC25A45
ENSG00000164078	MST1R
ENSG00000175203	DCTN2
ENSG00000111445	RFC5
ENSG00000164111	ANXA5
ENSG00000162062	C16orf59
ENSG00000119866	BCL11A
ENSG00000183386	FHL3
ENSG00000166851	PLK1
ENSG00000131747	TOP2A
ENSG00000115648	MLPH
ENSG00000151690	MFSD6
ENSG00000139722	VPS37B
ENSG00000154839	SKA1
ENSG00000121281	ADCY7
ENSG00000131725	WDR44
ENSG00000168286	THAP11
ENSG00000054793	ATP9A
ENSG00000132688	NES
ENSG00000204540	PSORS1C1
ENSG00000104738	MCM4

## Sheet: TRIM24 unique
TRIM24-BRAF vs. All uninduced lines and induced GFP line
geneSet	description	link	Size Gene Set	Genes in Gene Set	Expected	Ratio	pValue	padj	FDR	overlapId	userId
R-HSA-983712	Ion channel transport	http://reactome.org/PathwayBrowser/#/R-HSA-983712	186	3	0.158628	18.9122	0.000418528	0.00418528	0.723217	444;538;55107	ENSG00000165240;ENSG00000131620;ENSG00000198363
R-HSA-382551	Transport of small molecules	http://reactome.org/PathwayBrowser/#/R-HSA-382551	723	4	0.616602	6.48717	0.00208398	0.0208398	1	444;538;55107;64078	ENSG00000165240;ENSG00000131620;ENSG00000198363;ENSG00000197506
R-HSA-2672351	Stimuli-sensing channels	http://reactome.org/PathwayBrowser/#/R-HSA-2672351	109	2	0.0929593	21.5148	0.00362967	0.0362967	1	444;55107	ENSG00000131620;ENSG00000198363
R-HSA-83936	Transport of nucleosides and free purine and pyrimidine bases across the plasma membrane	http://reactome.org/PathwayBrowser/#/R-HSA-83936	7	1	0.00596987	167.508	0.0059563	0.059563	1	64078	ENSG00000197506
R-HSA-8983711	OAS antiviral response	http://reactome.org/PathwayBrowser/#/R-HSA-8983711	8	1	0.0068227	146.569	0.00680462	0.0680462	1	6041	ENSG00000135828
R-HSA-193775	Synthesis of bile acids and bile salts via 24-hydroxycholesterol	http://reactome.org/PathwayBrowser/#/R-HSA-193775	14	1	0.0119397	83.754	0.011881	0.11881	1	8644	ENSG00000196139
R-HSA-193807	Synthesis of bile acids and bile salts via 27-hydroxycholesterol	http://reactome.org/PathwayBrowser/#/R-HSA-193807	15	1	0.0127926	78.1704	0.0127249	0.127249	1	8644	ENSG00000196139
R-HSA-2162123	Synthesis of Prostaglandins (PG) and Thromboxanes (TX)	http://reactome.org/PathwayBrowser/#/R-HSA-2162123	15	1	0.0127926	78.1704	0.0127249	0.127249	1	8644	ENSG00000196139
R-HSA-6804115	TP53 regulates transcription of additional cell cycle genes whose exact role in the p53 pathway remain uncertain	http://reactome.org/PathwayBrowser/#/R-HSA-6804115	21	1	0.0179096	55.836	0.0177744	0.177744	1	28984	ENSG00000102760
R-HSA-5365859	RA biosynthesis pathway	http://reactome.org/PathwayBrowser/#/R-HSA-5365859	22	1	0.0187624	53.298	0.0186137	0.186137	1	8644	ENSG00000196139
EnsembleGeneID	Gene Symbol
ENSG00000165240	ATP7A
ENSG00000131620	ANO1
ENSG00000198363	ASPH
ENSG00000197506	SLC28A3
ENSG00000196139	AKR1C3
ENSG00000182247	UBE2E2
ENSG00000102760	RGCC
ENSG00000117266	CDK18
ENSG00000161547	SRSF2
ENSG00000135828	RNASEL
